# Supplementary material for: 1,2,3-Triazole-fused spirochromenes as potential anti-tubercular agents: synthesis and biological evaluation
Source: Royal Society of Chemistry journal article supplement (doi:10.1039/c8ra03197e), 2018-01-01

Supporting Information

## 1,2,3-triazole fused spirochromenes as potential anti-tubercular agents: Synthesis and biological evaluation

Dongamanti Ashok,<sup>a\*</sup> Pamula Chiranjeevi,<sup>a</sup> Aamate Vikas Kumar,<sup>a</sup> Madderla Sarasija,<sup>b</sup> Vagolu Siva Krishna,<sup>c</sup> Dharmarajan Sriram,<sup>c</sup> Sridhar Balasubramanian<sup>d</sup>

<sup>a</sup>*Green and Medicinal Chemistry Lab, Department of Chemistry, Osmania University, Hyderabad-500 007, Telangana State, India*

<sup>b</sup>*Department of Chemistry, Satavahana University, Karimnagar-505 001, Telangana State, India*

<sup>c</sup>*Department of Pharmacy, Birla Institute of Technology & Science - Pilani, Hyderabad Campus, Jawahar Nagar, Hyderabad-500 078, Telangana State, India*

<sup>d</sup>*X- ray Crystallography Division, CSIR-Indian Institute of Chemical Technology, Hyderabad-500 007, India*

\* Corresponding author Tel.: +91-9391024769; e-mail: [ashokdou@gmail.com](mailto:ashokdou@gmail.com).

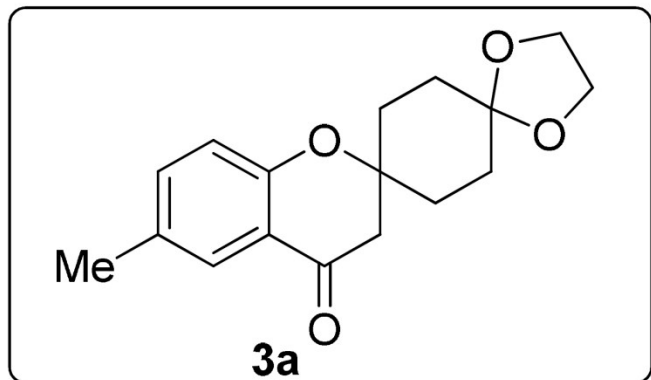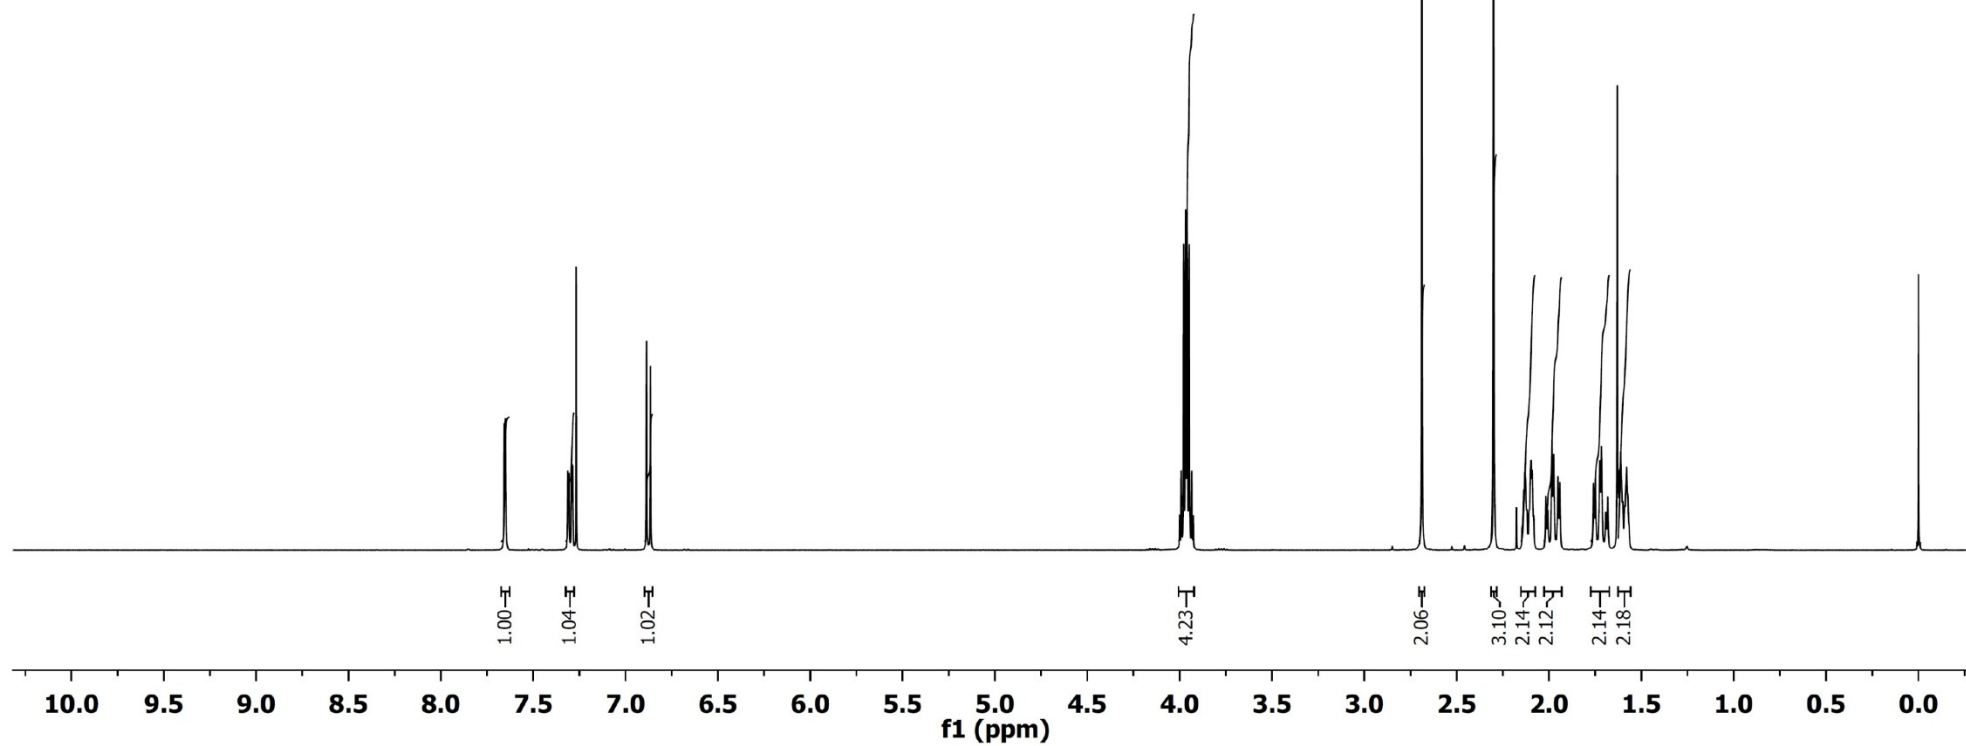

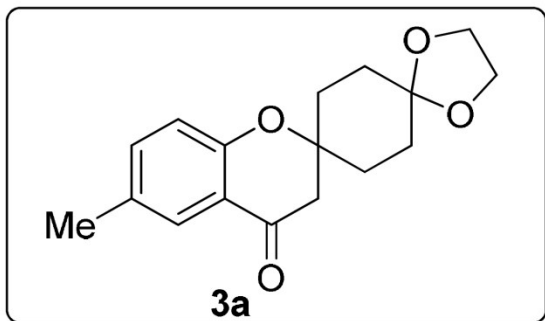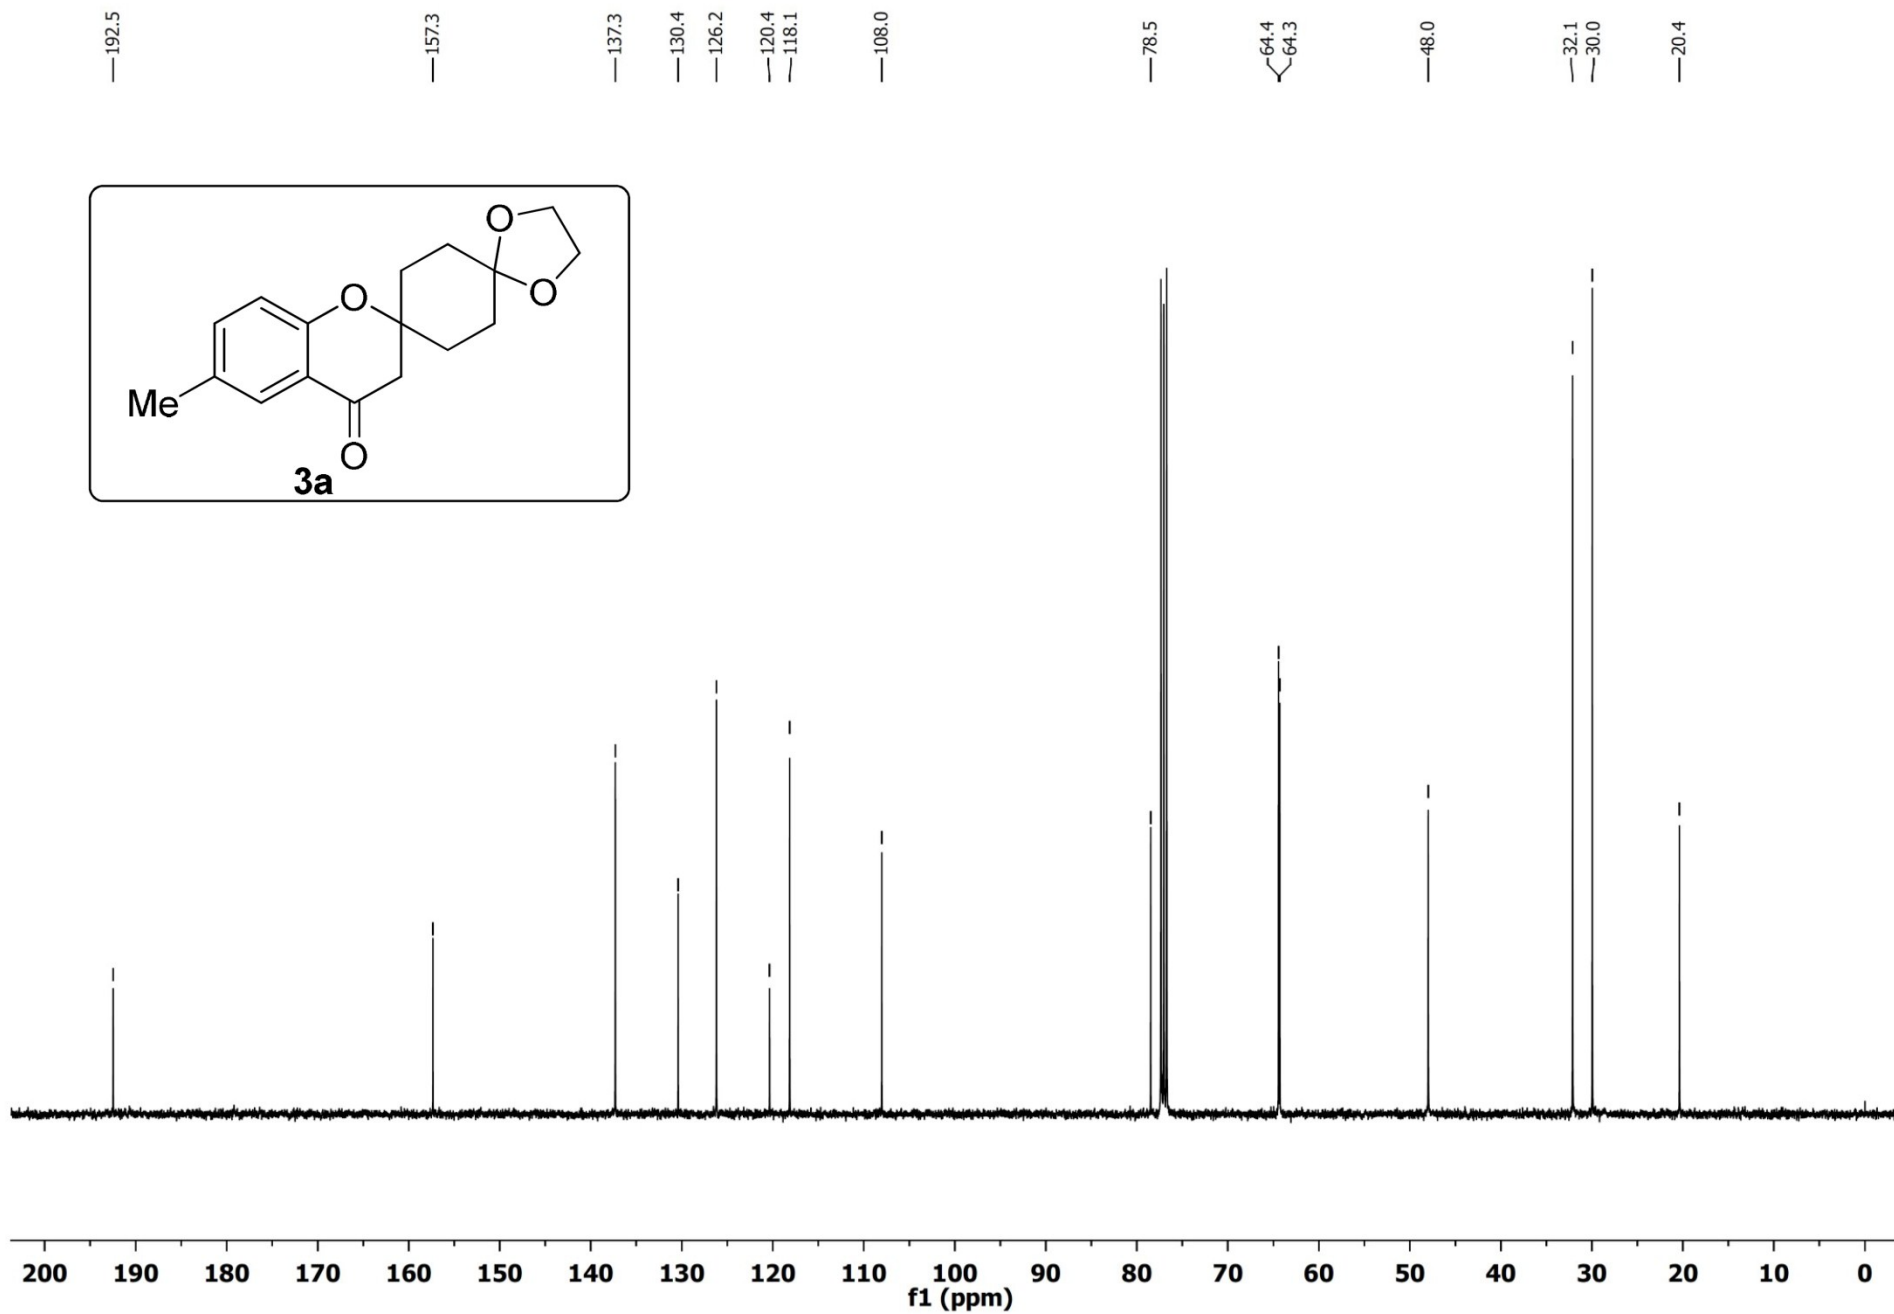

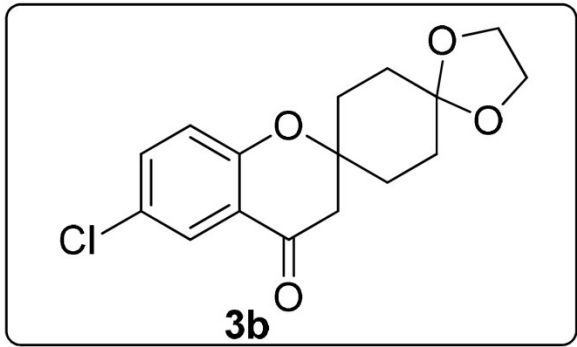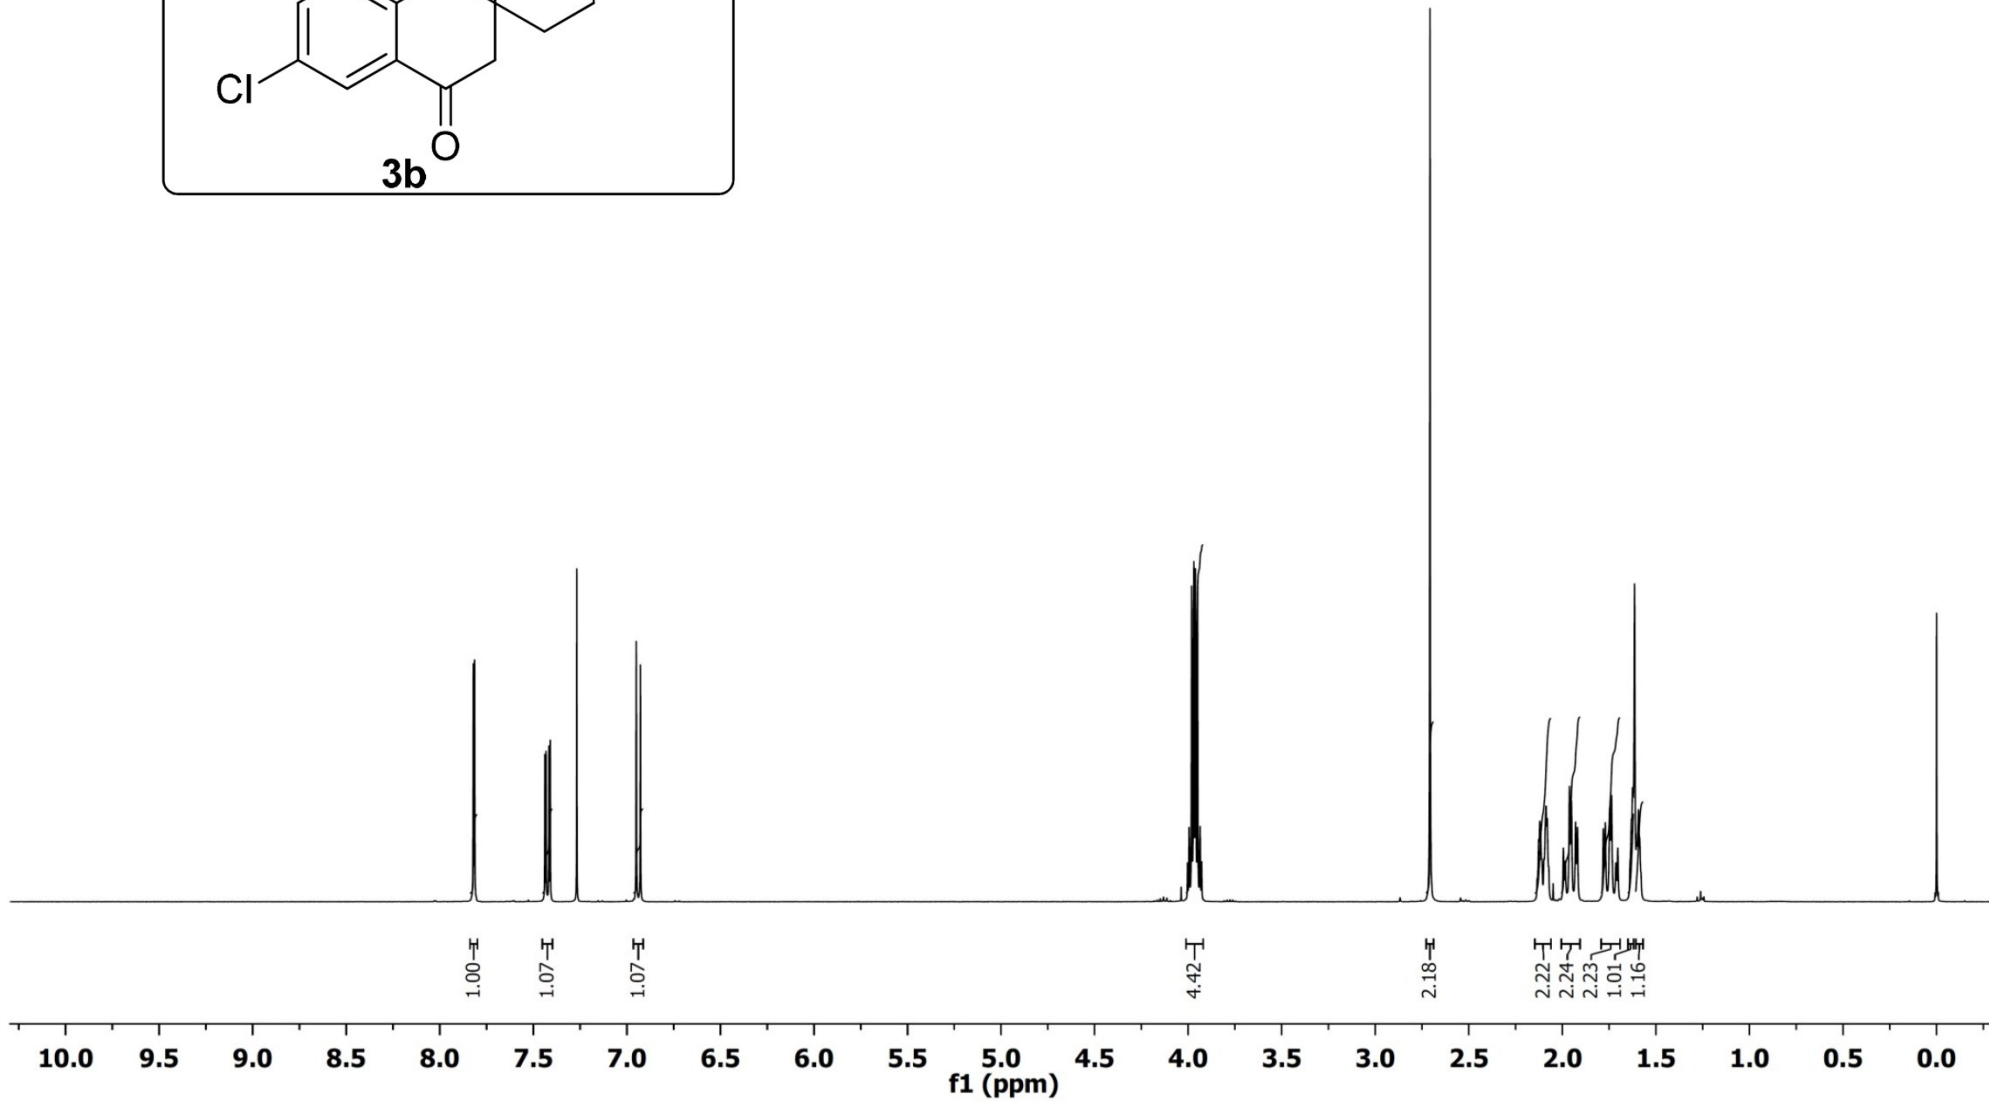

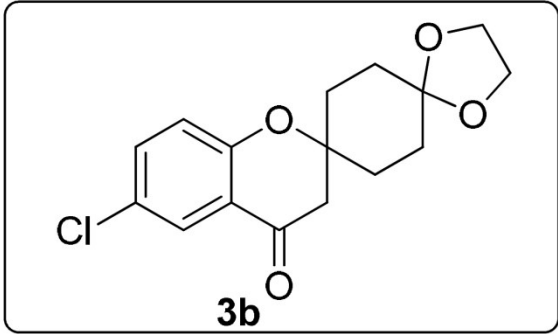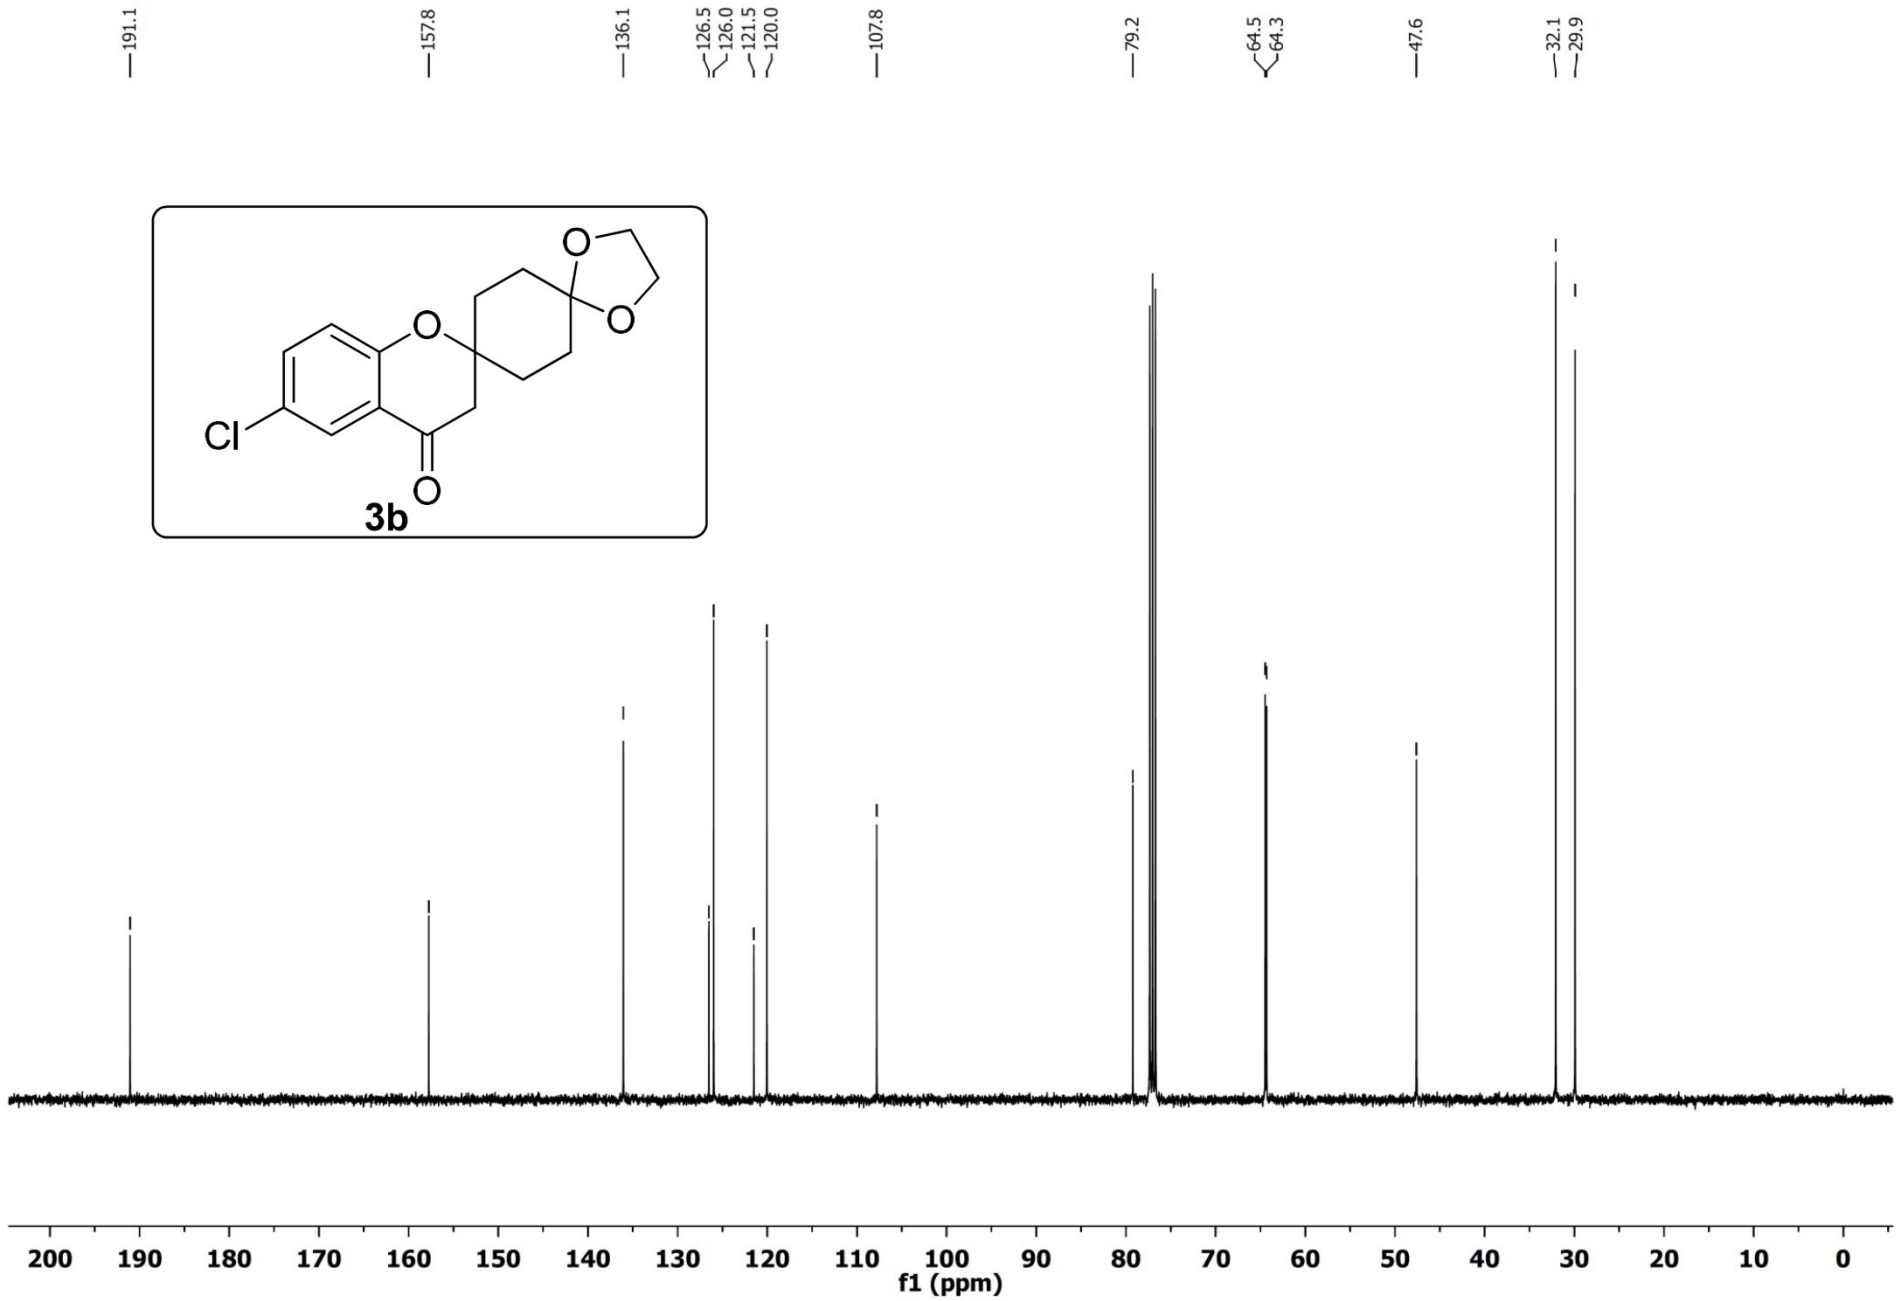

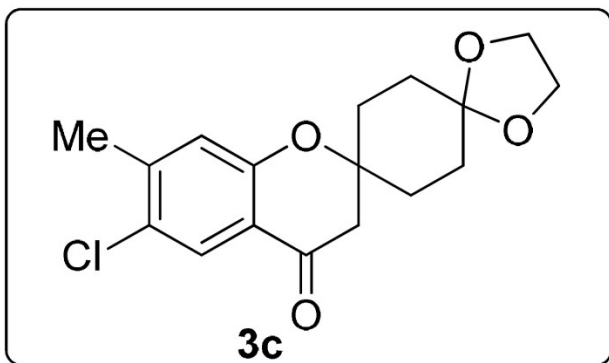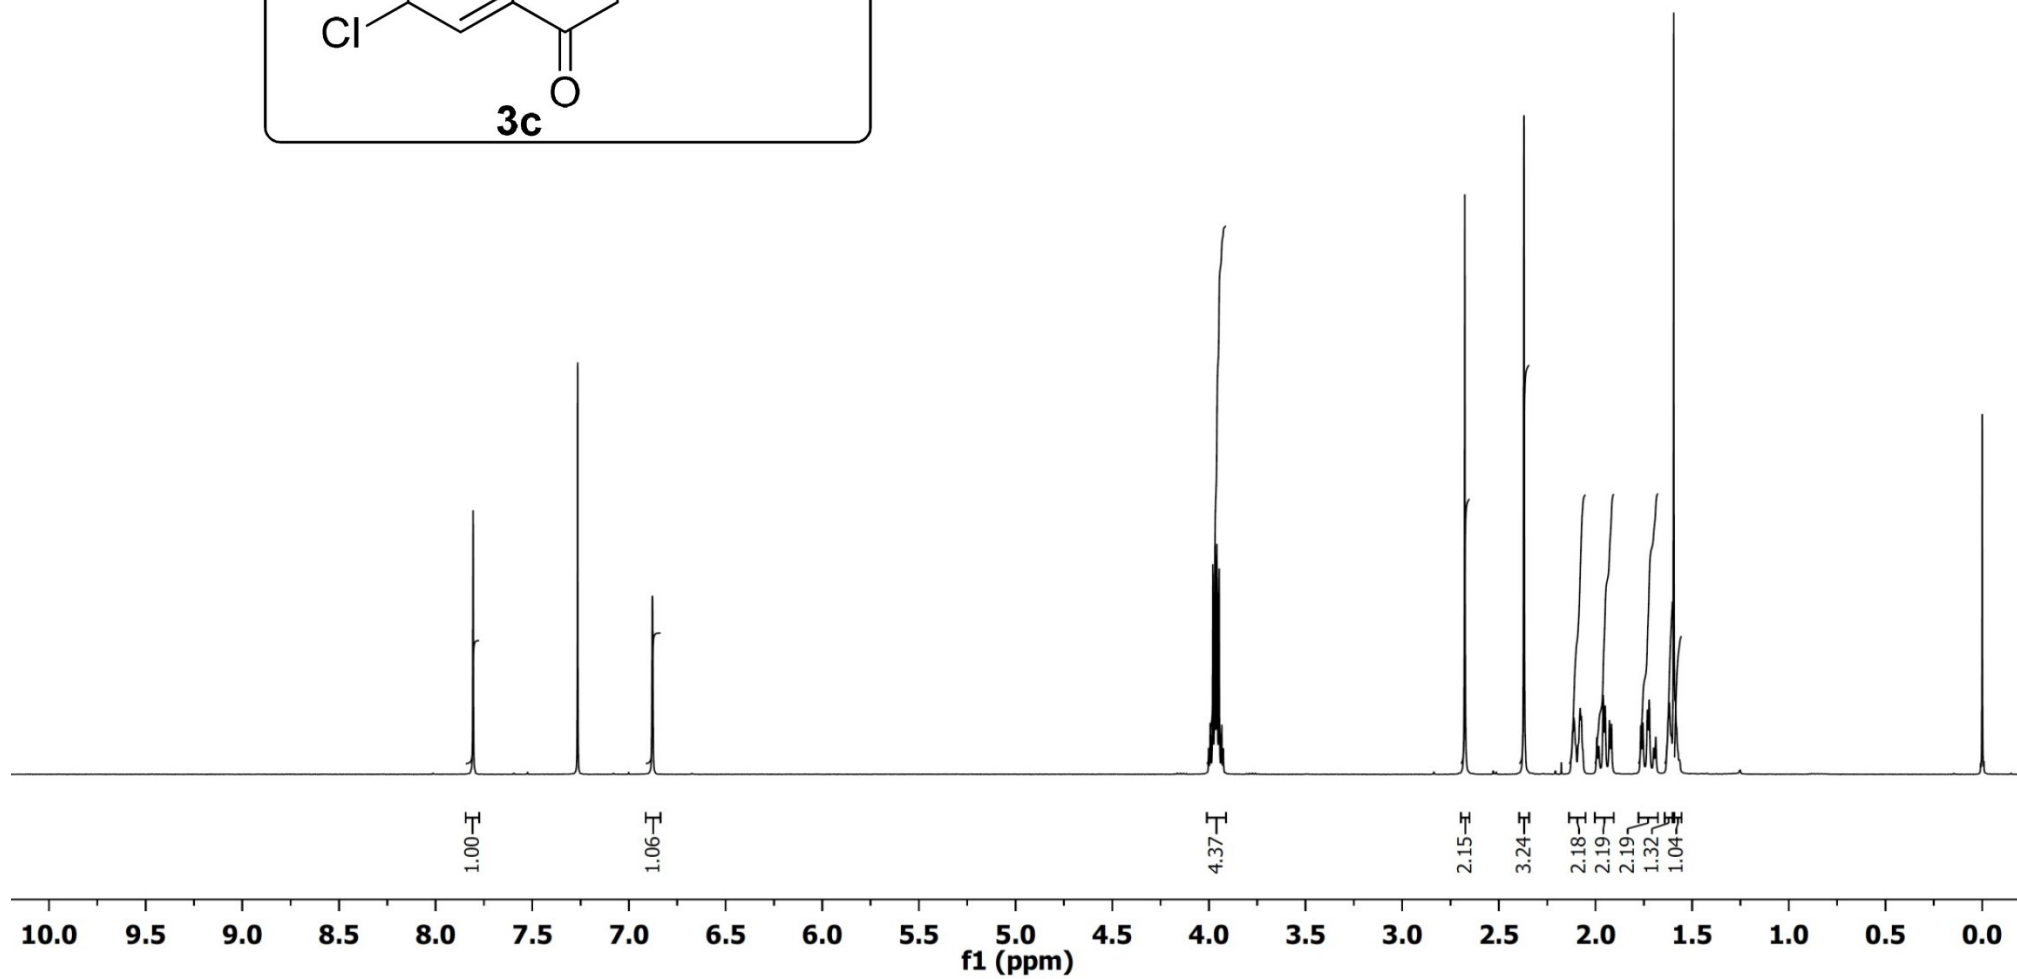

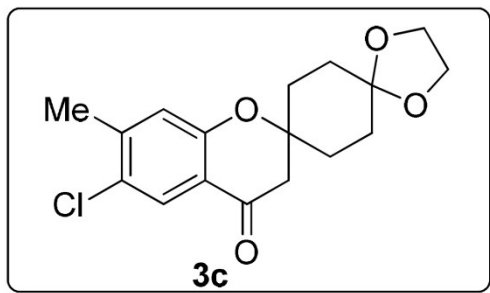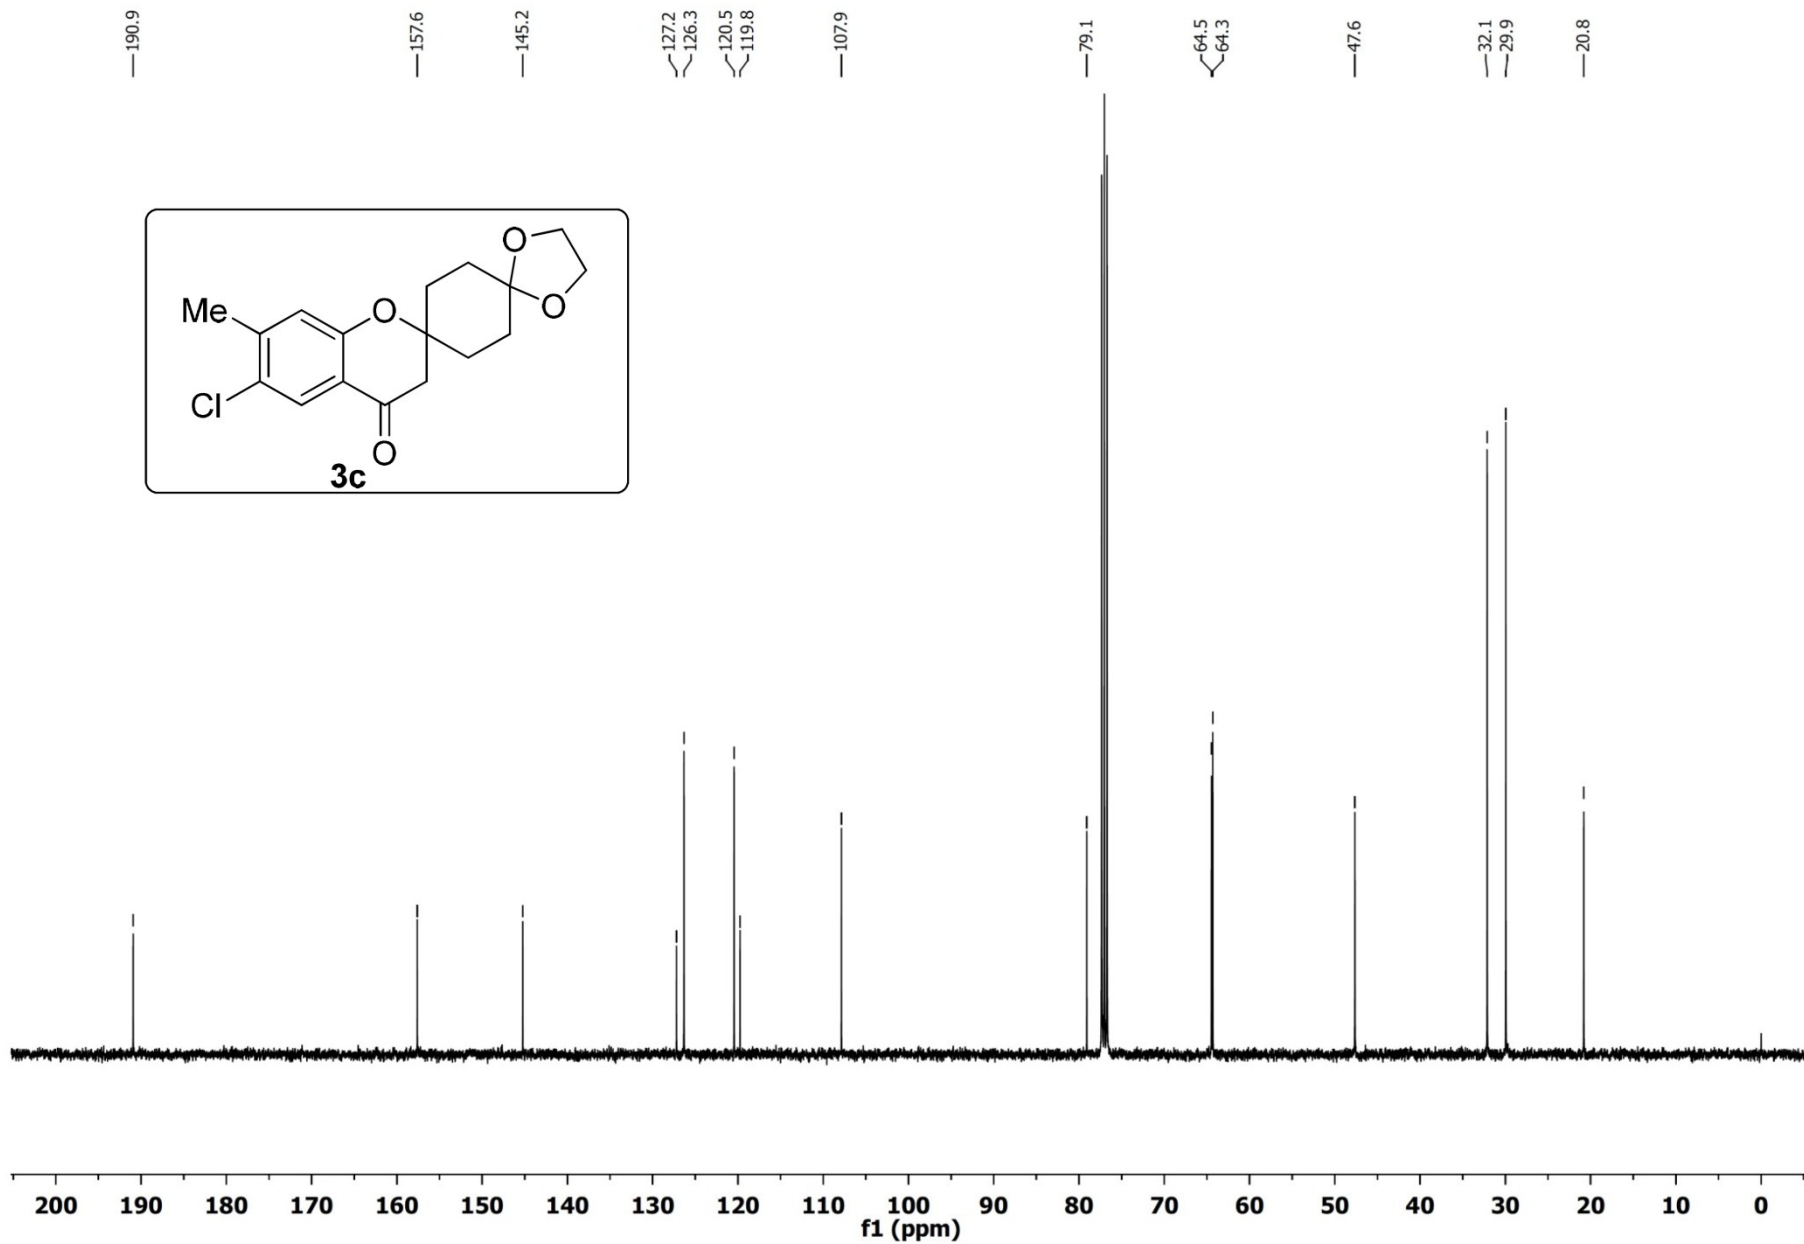

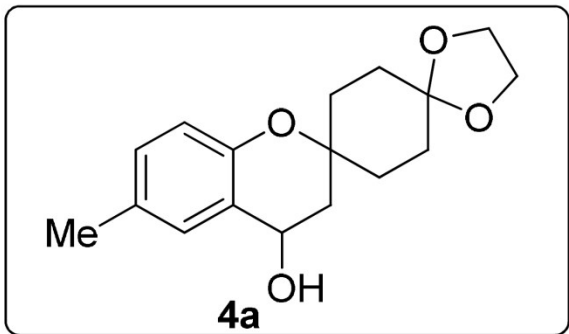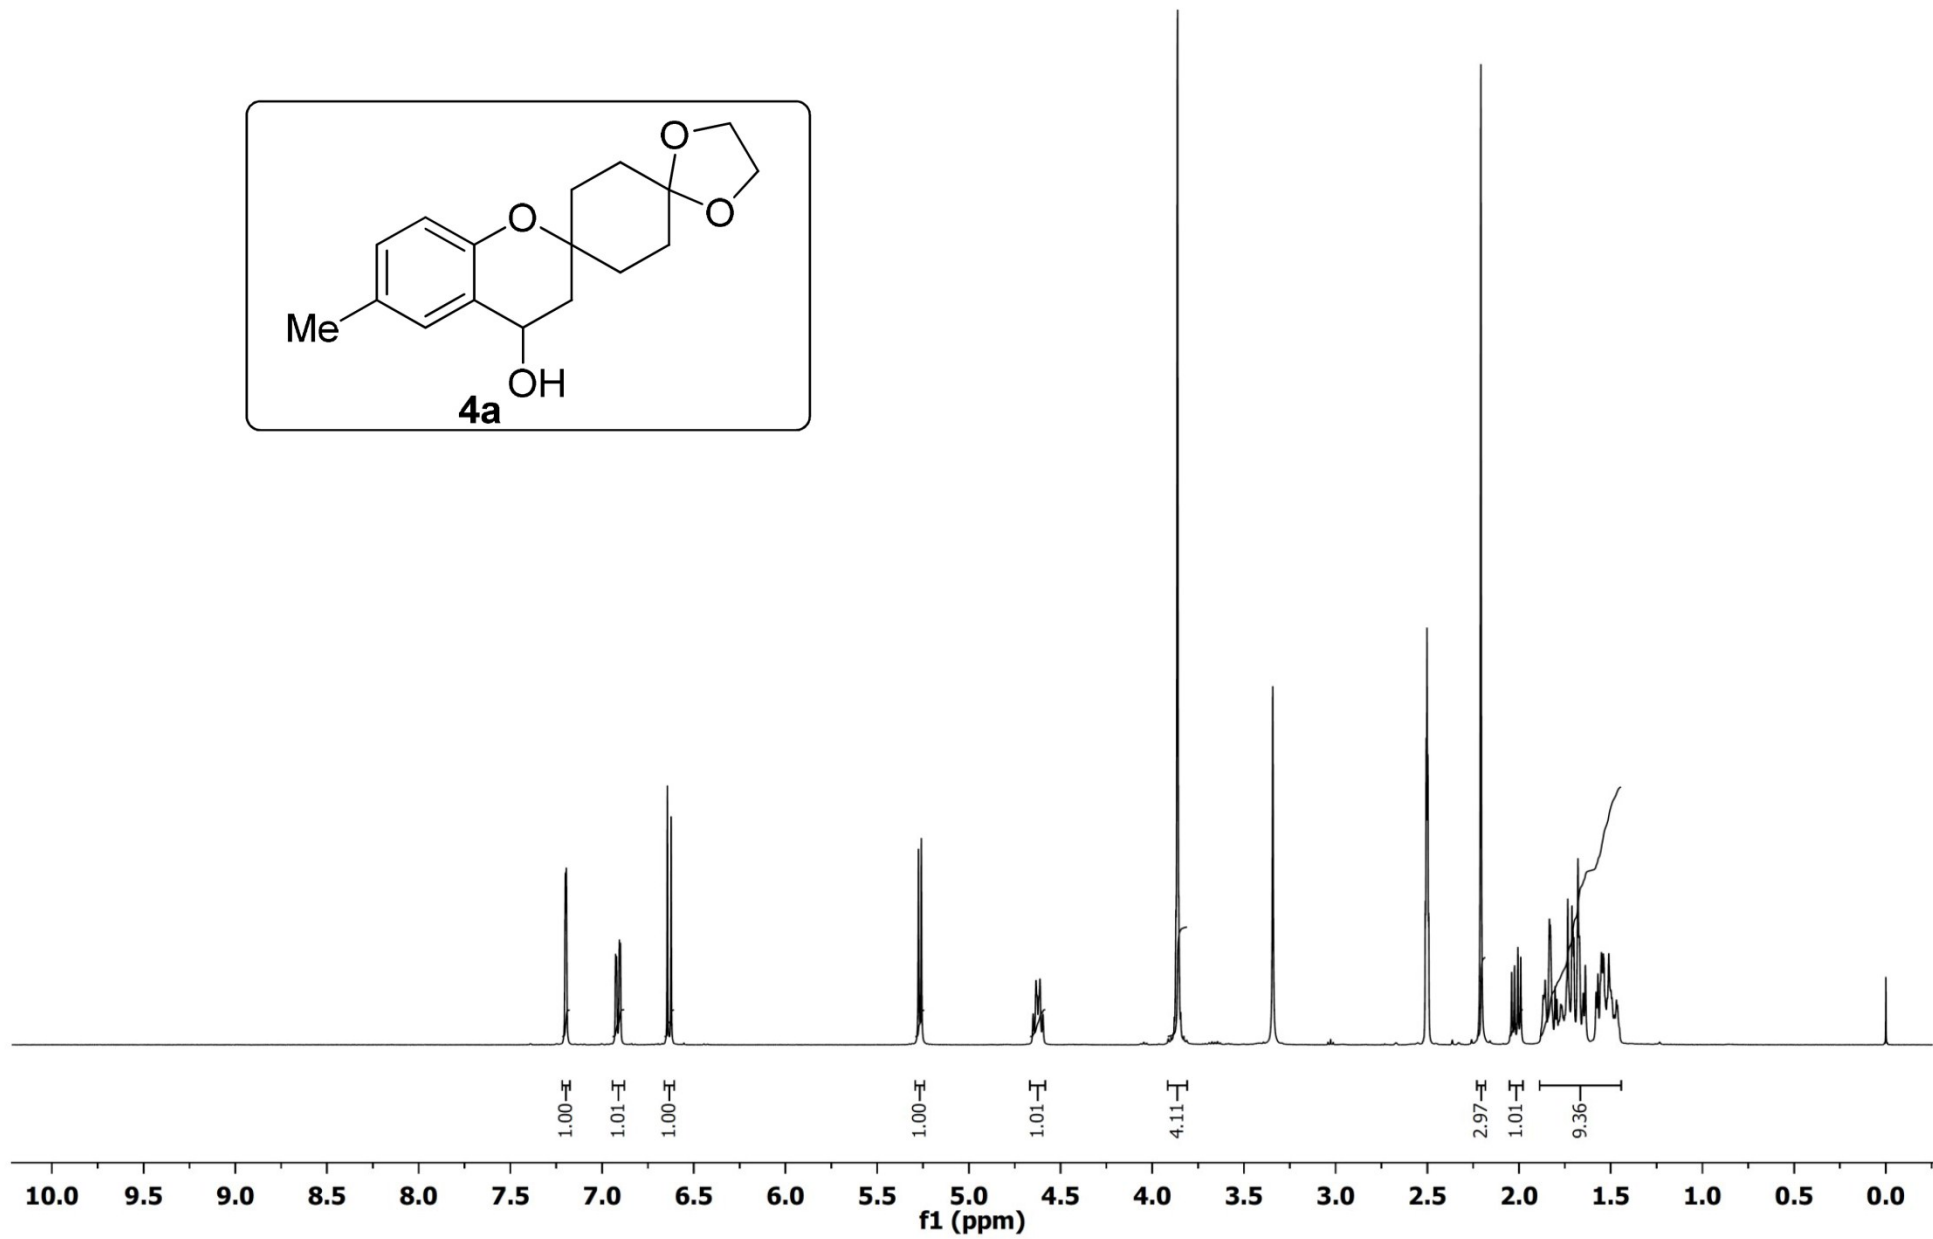



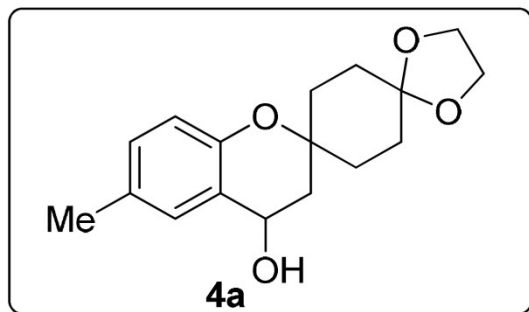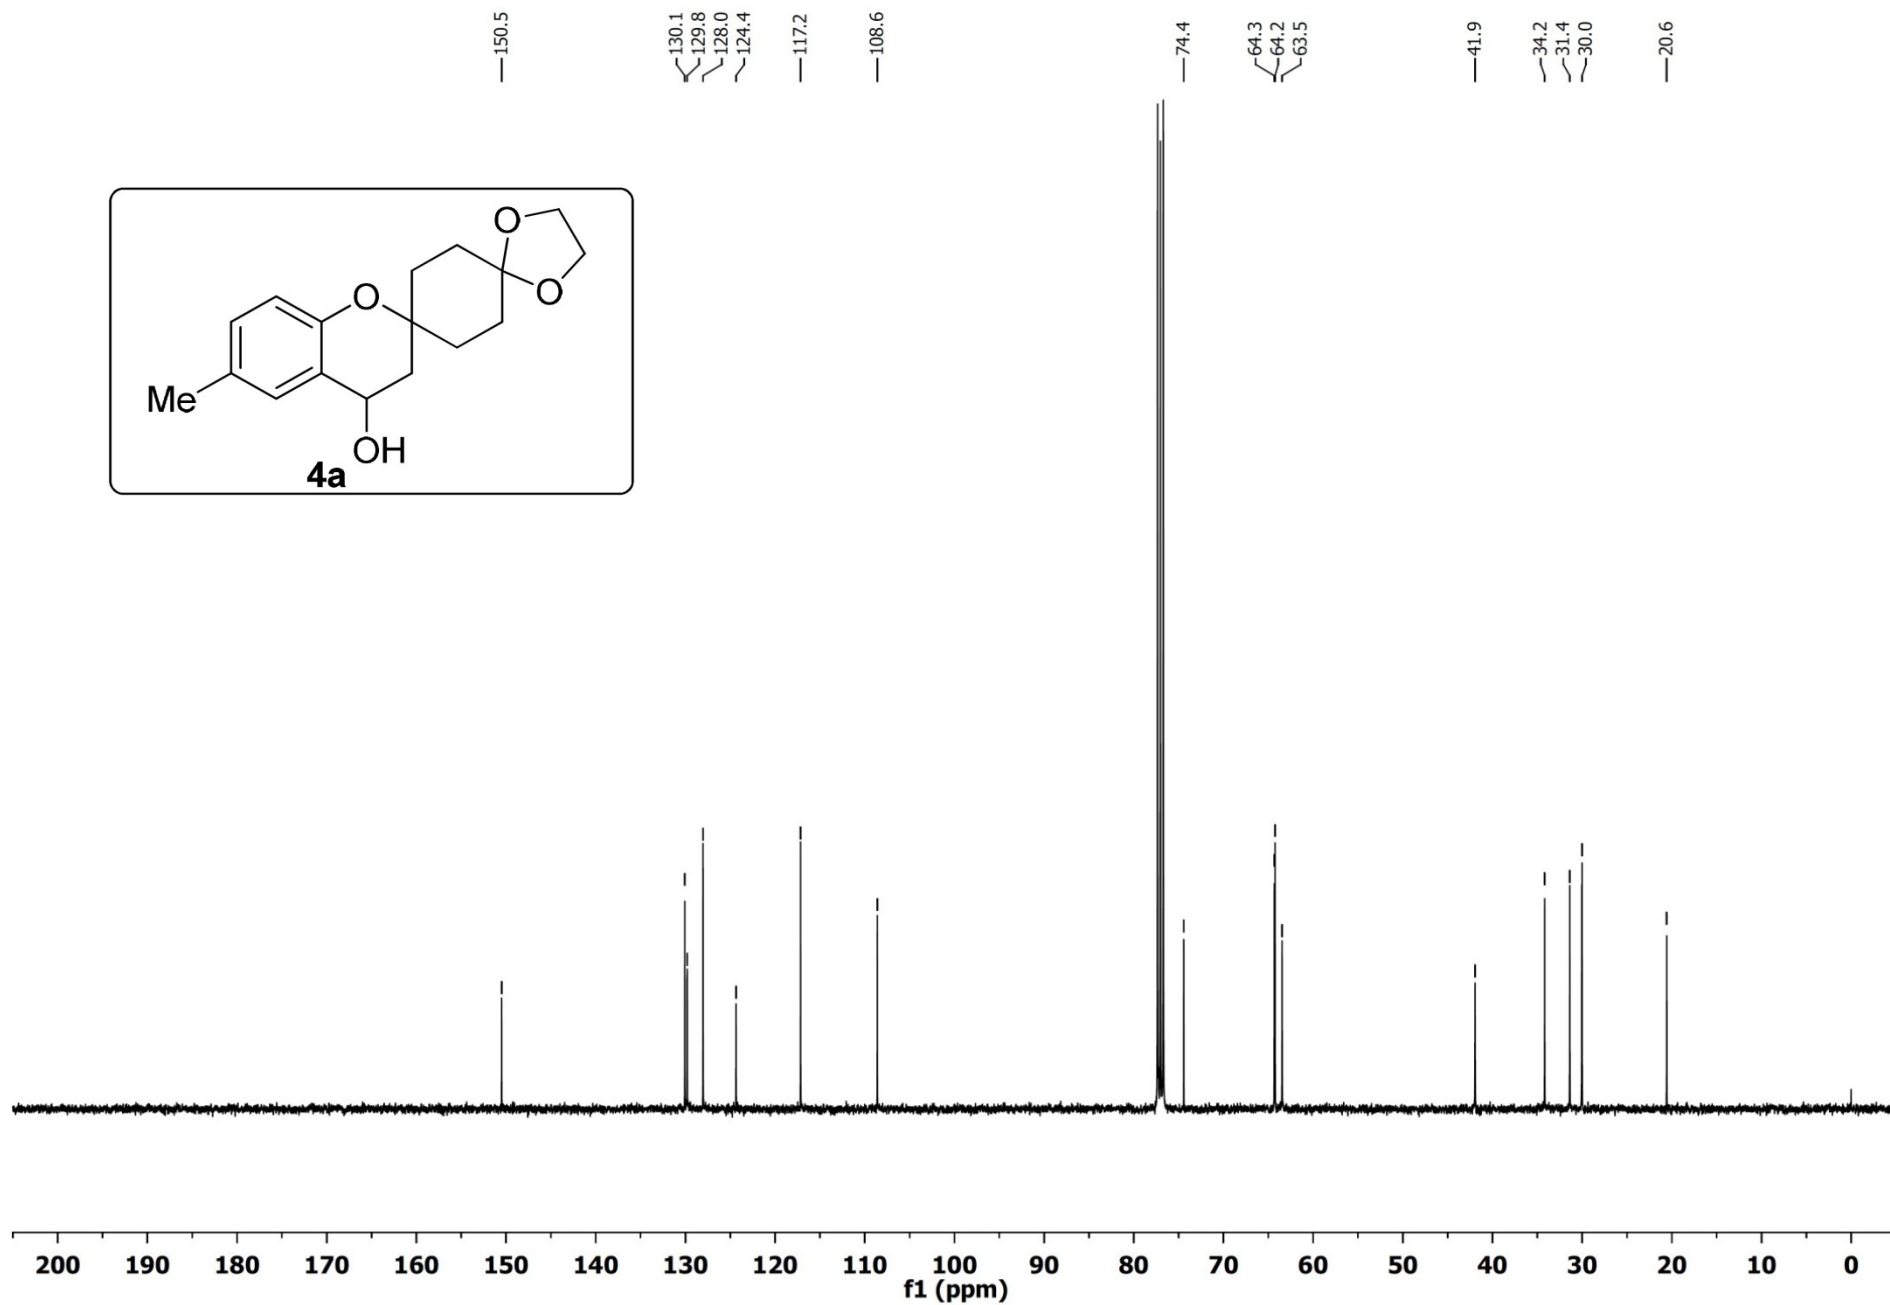

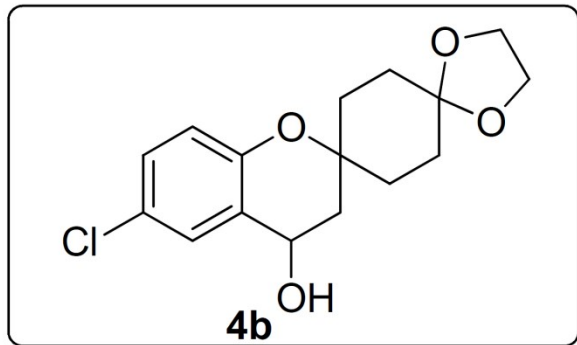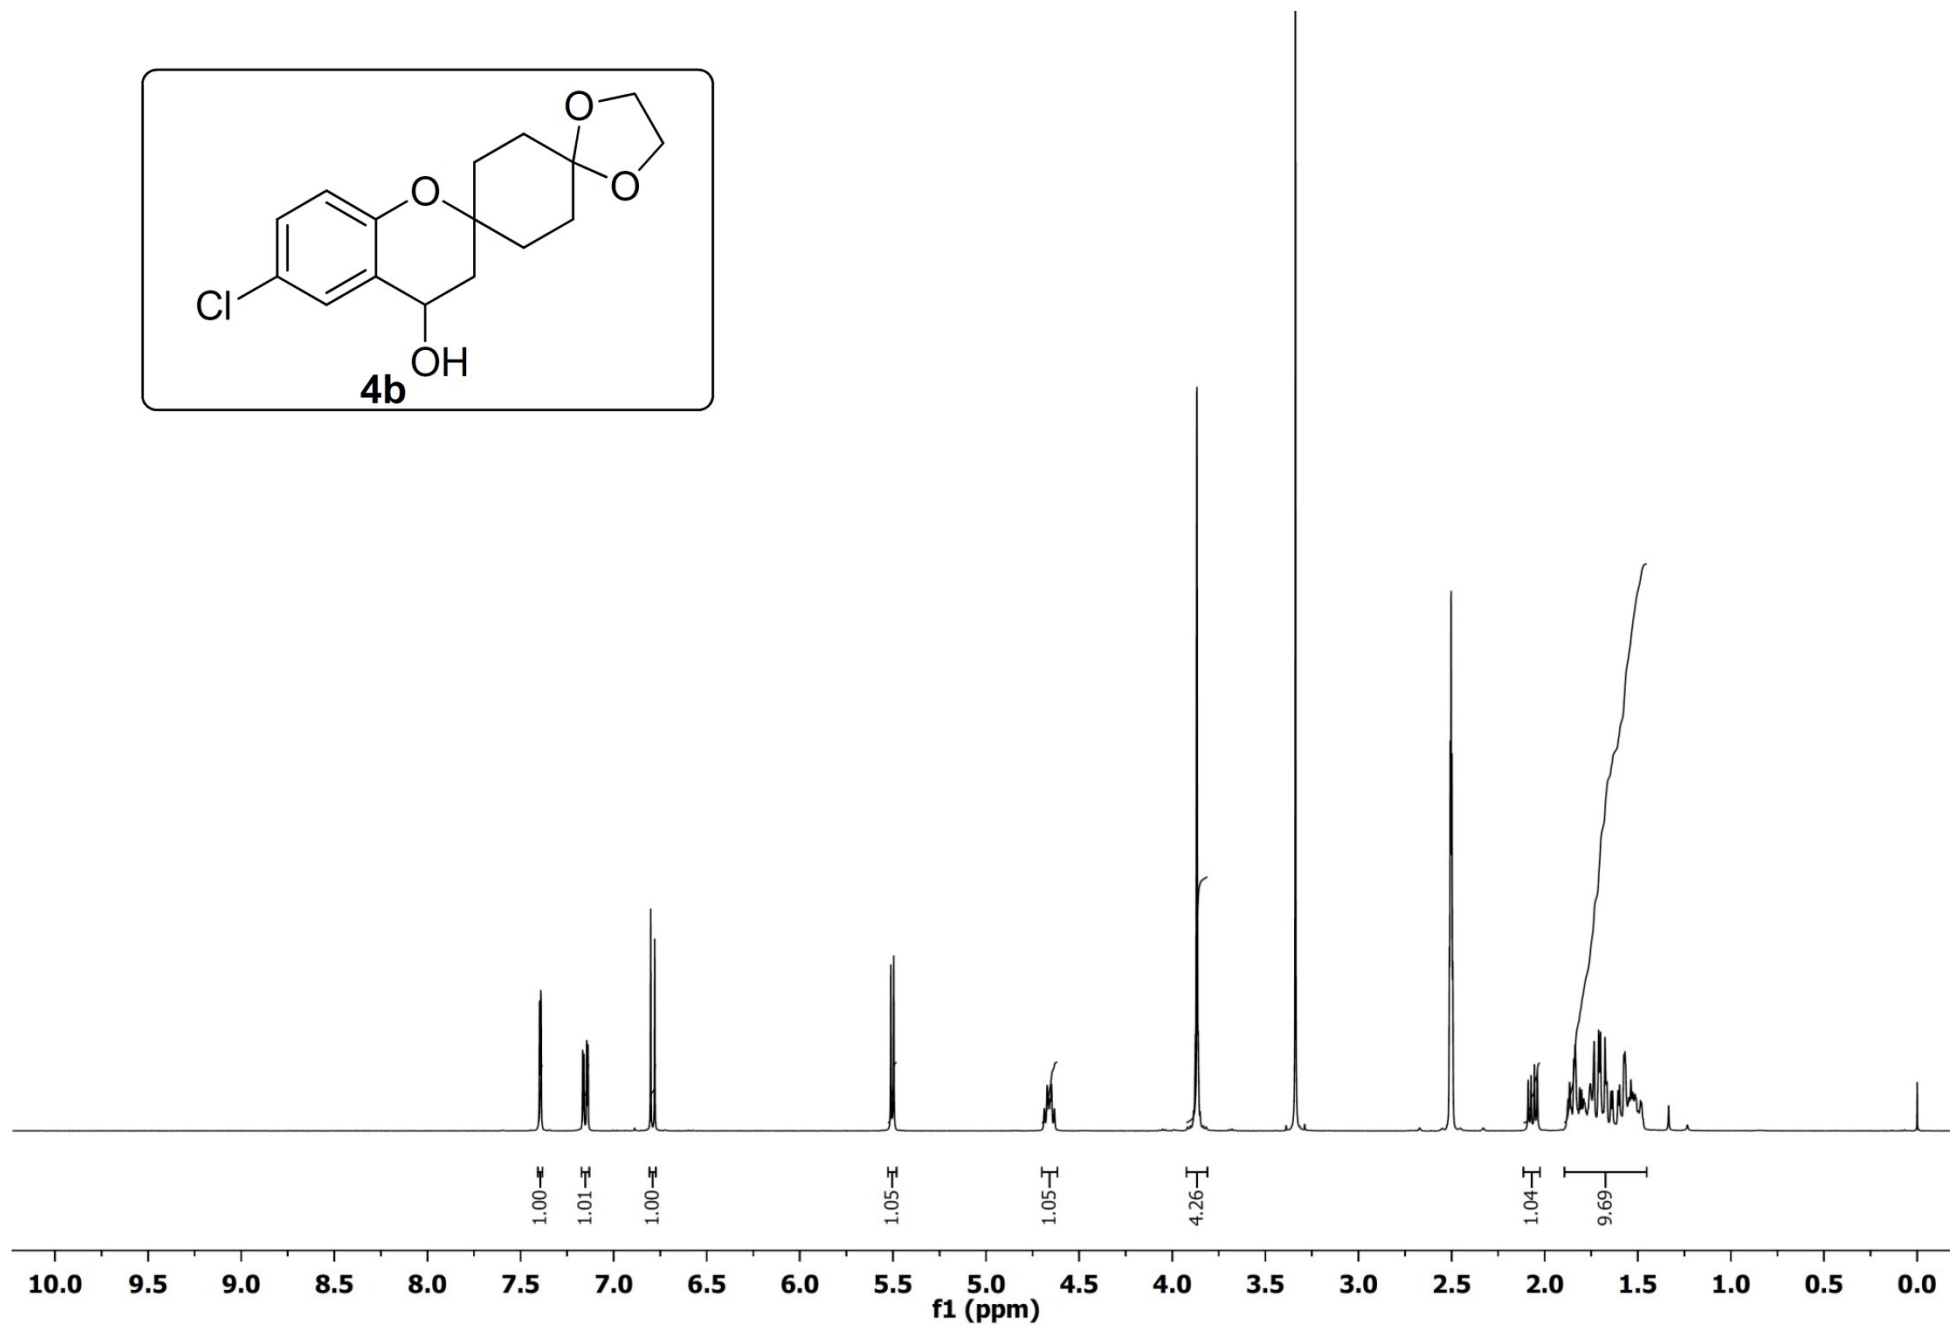

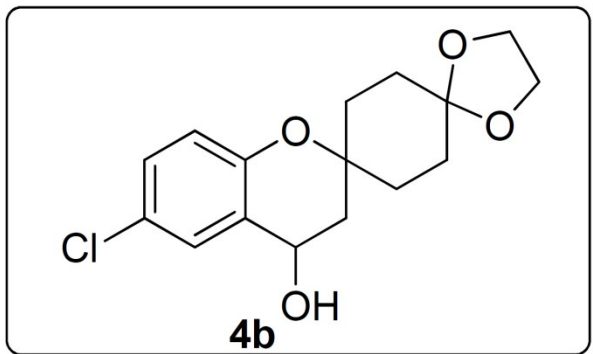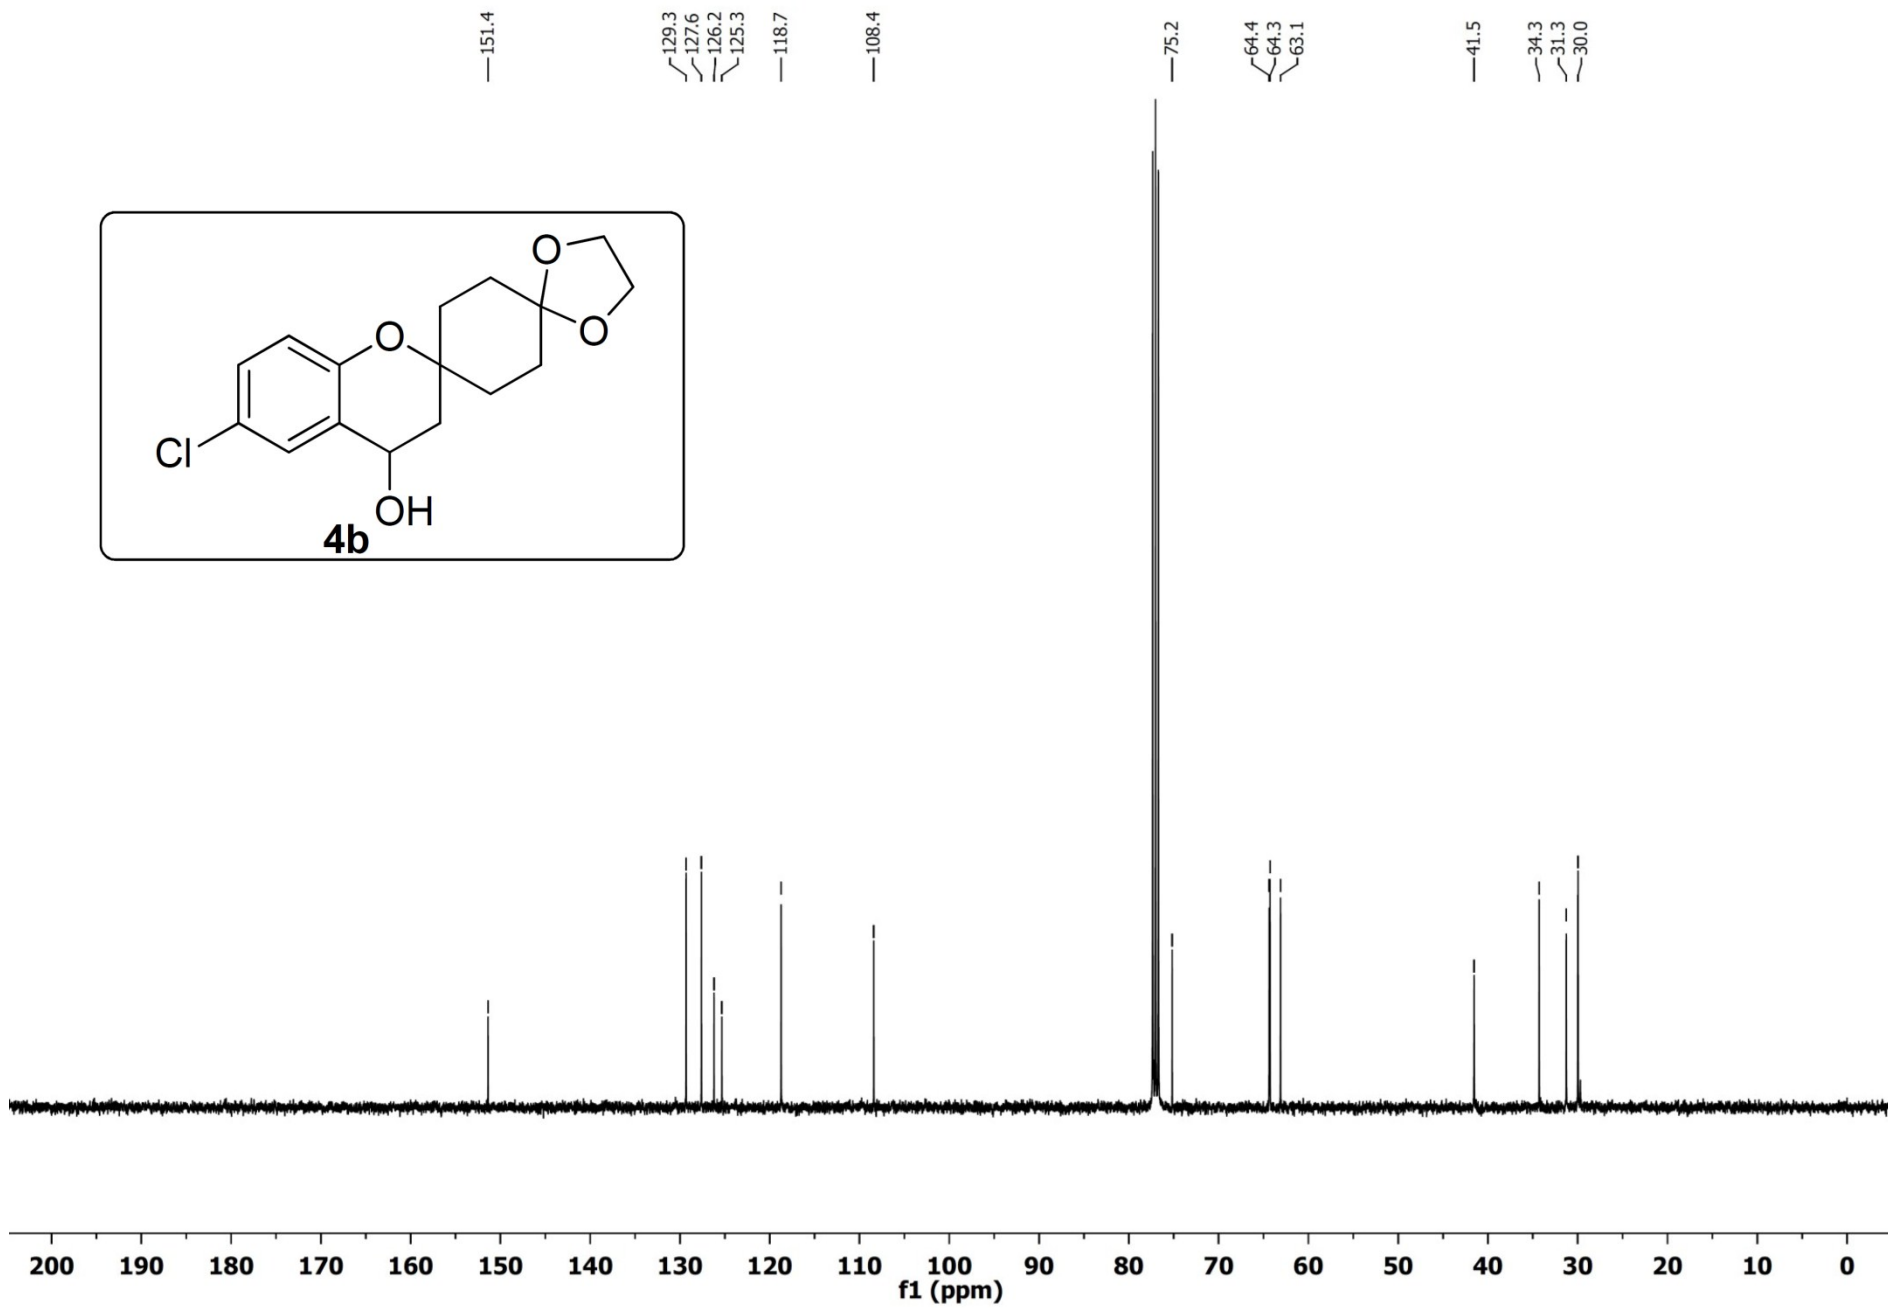

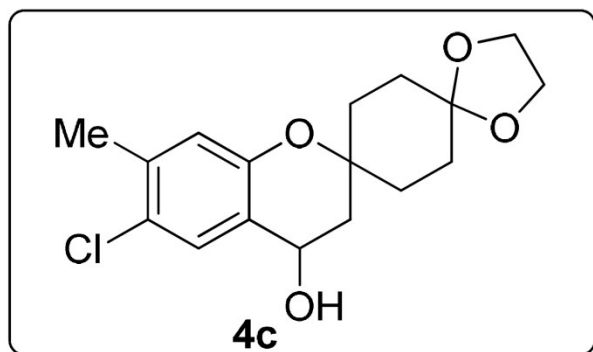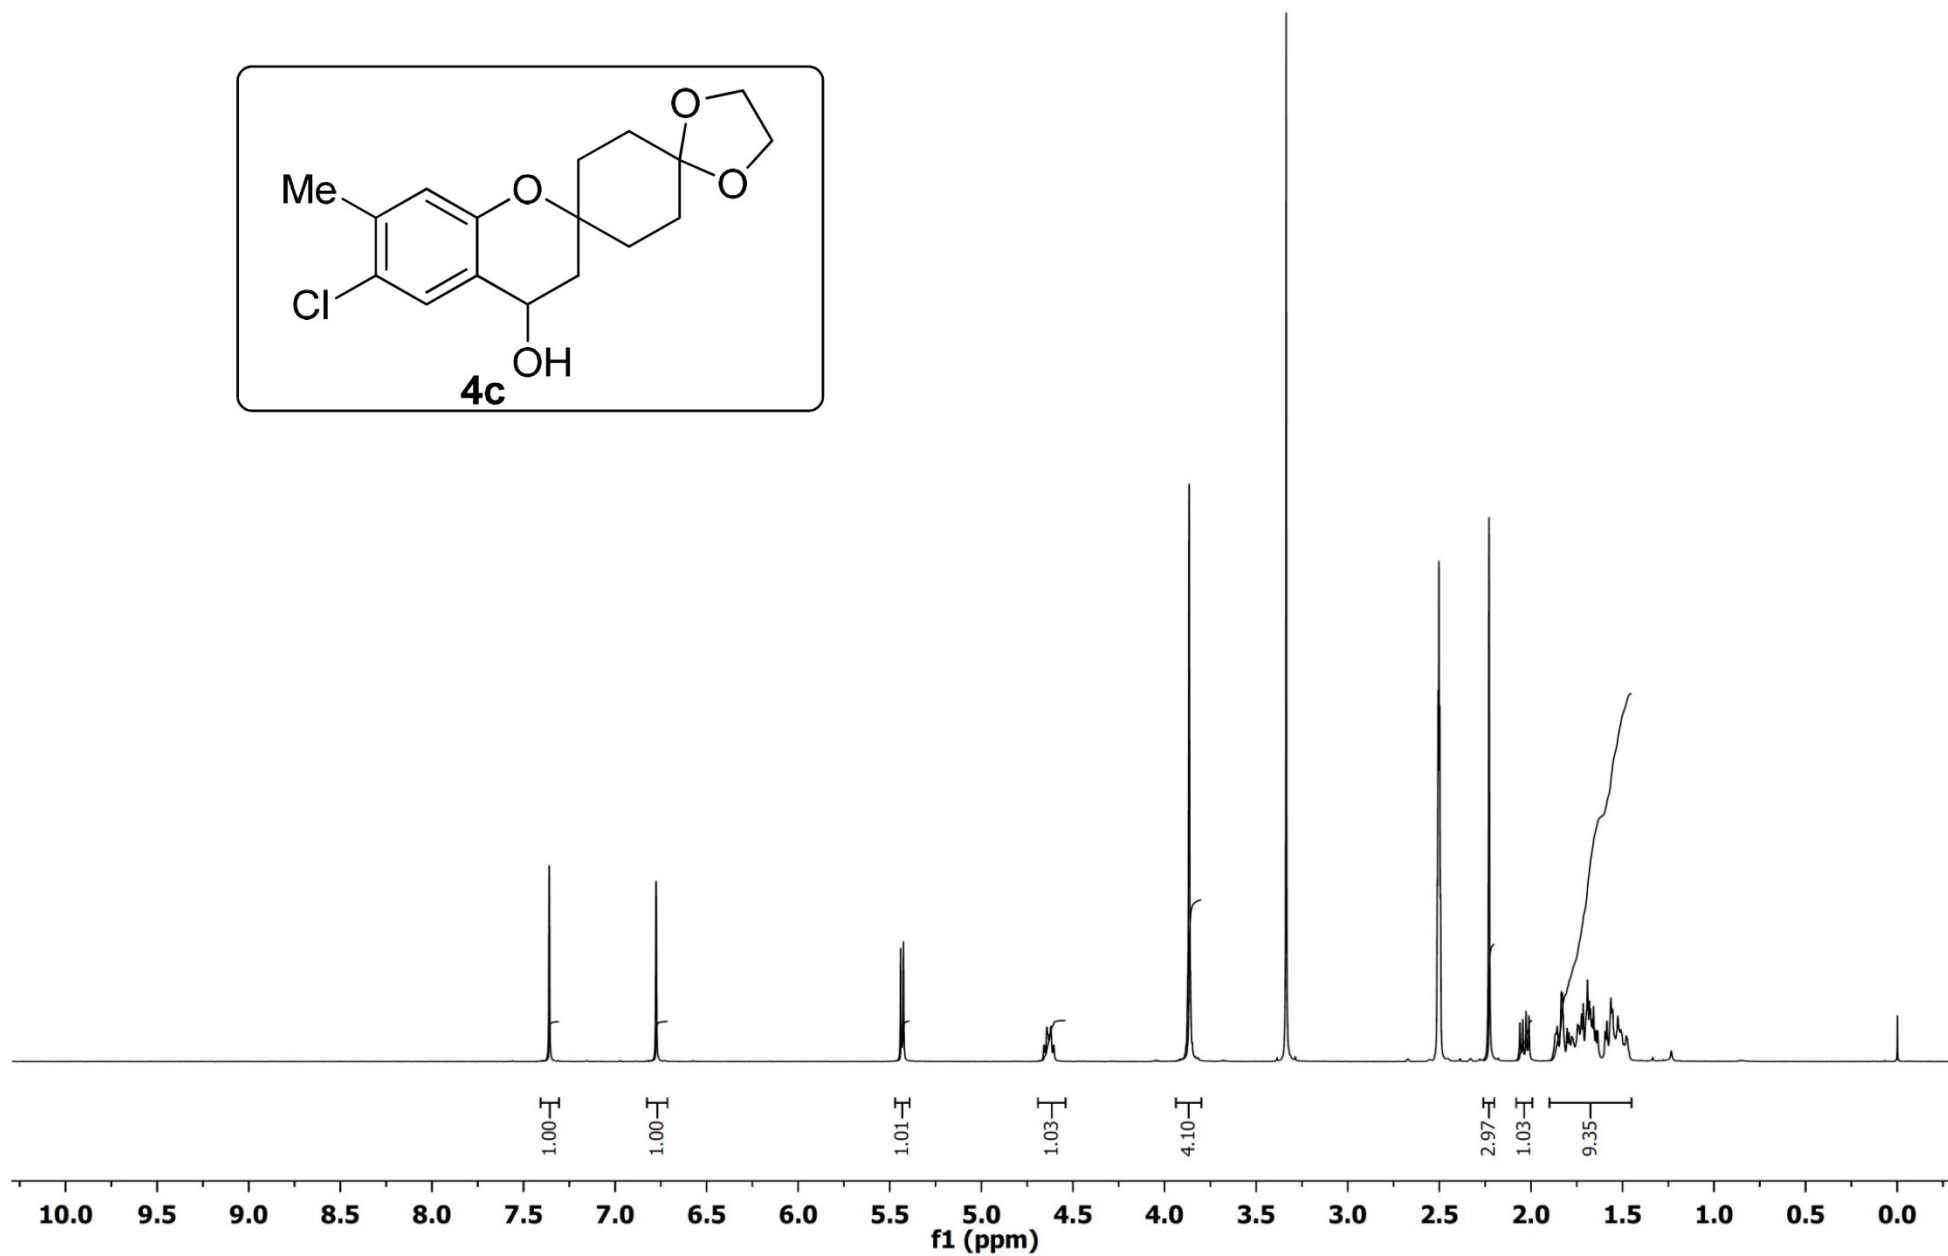

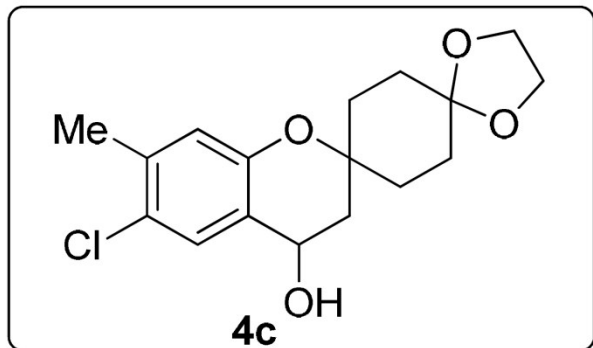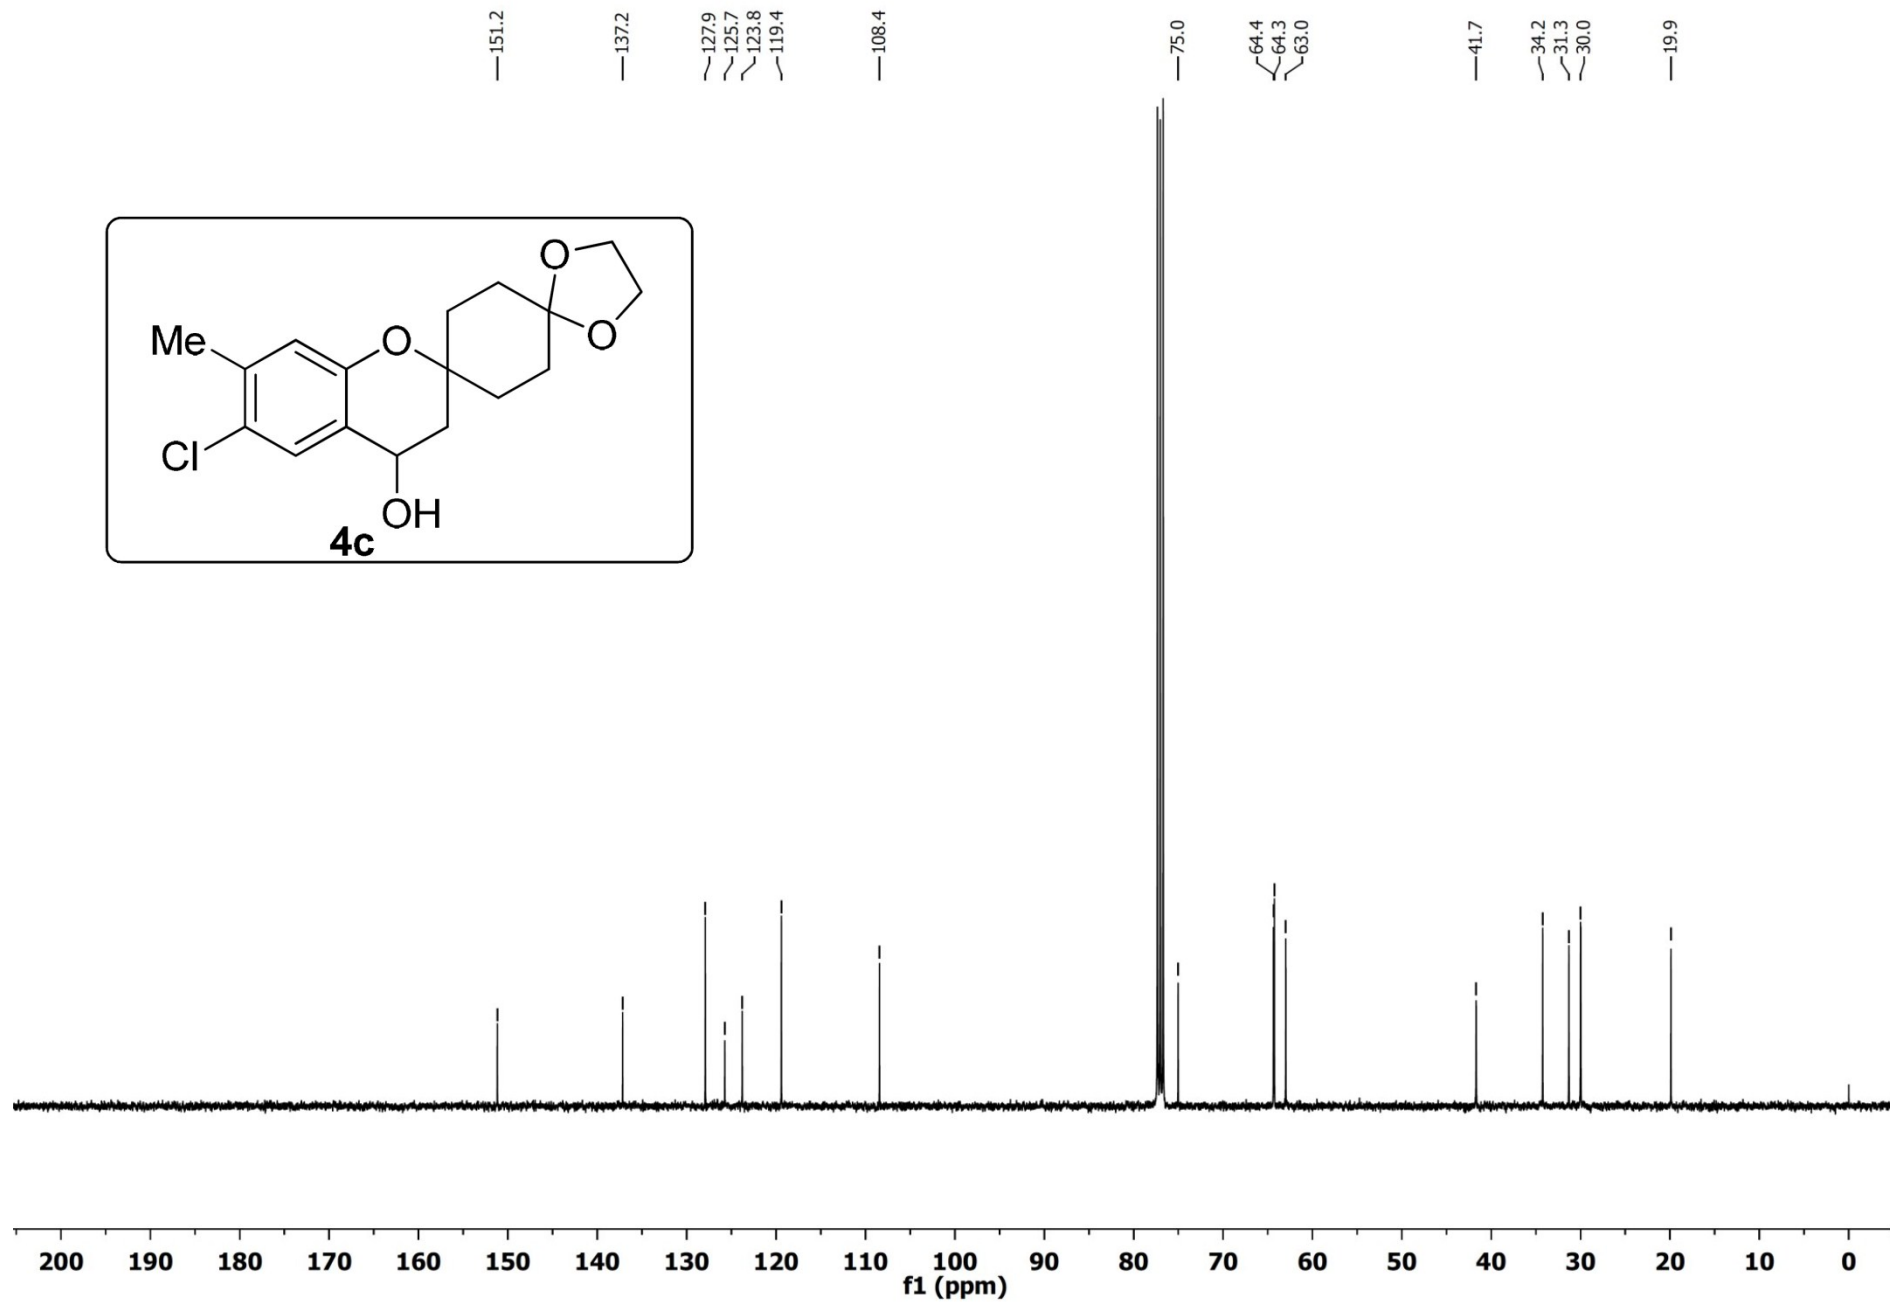

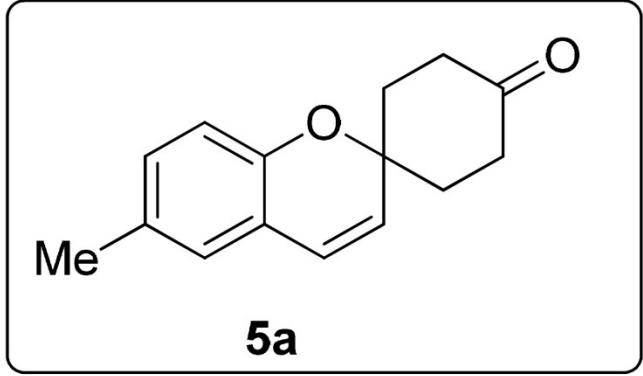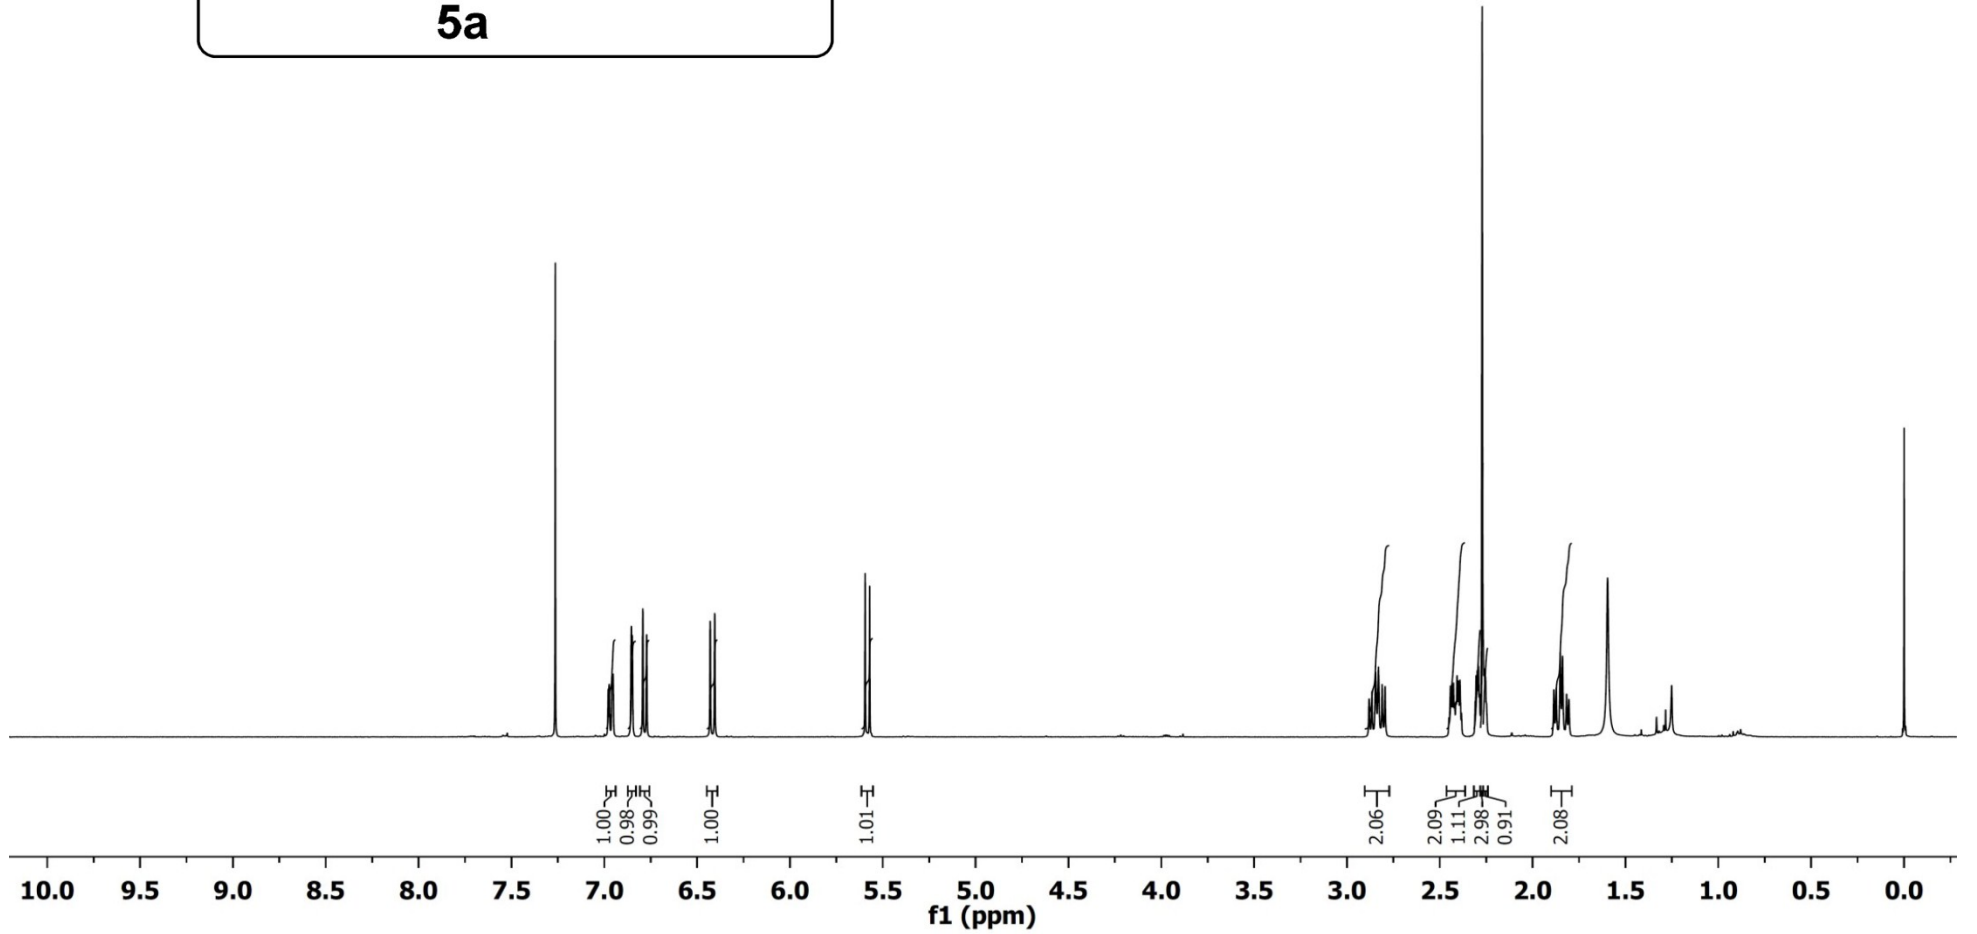

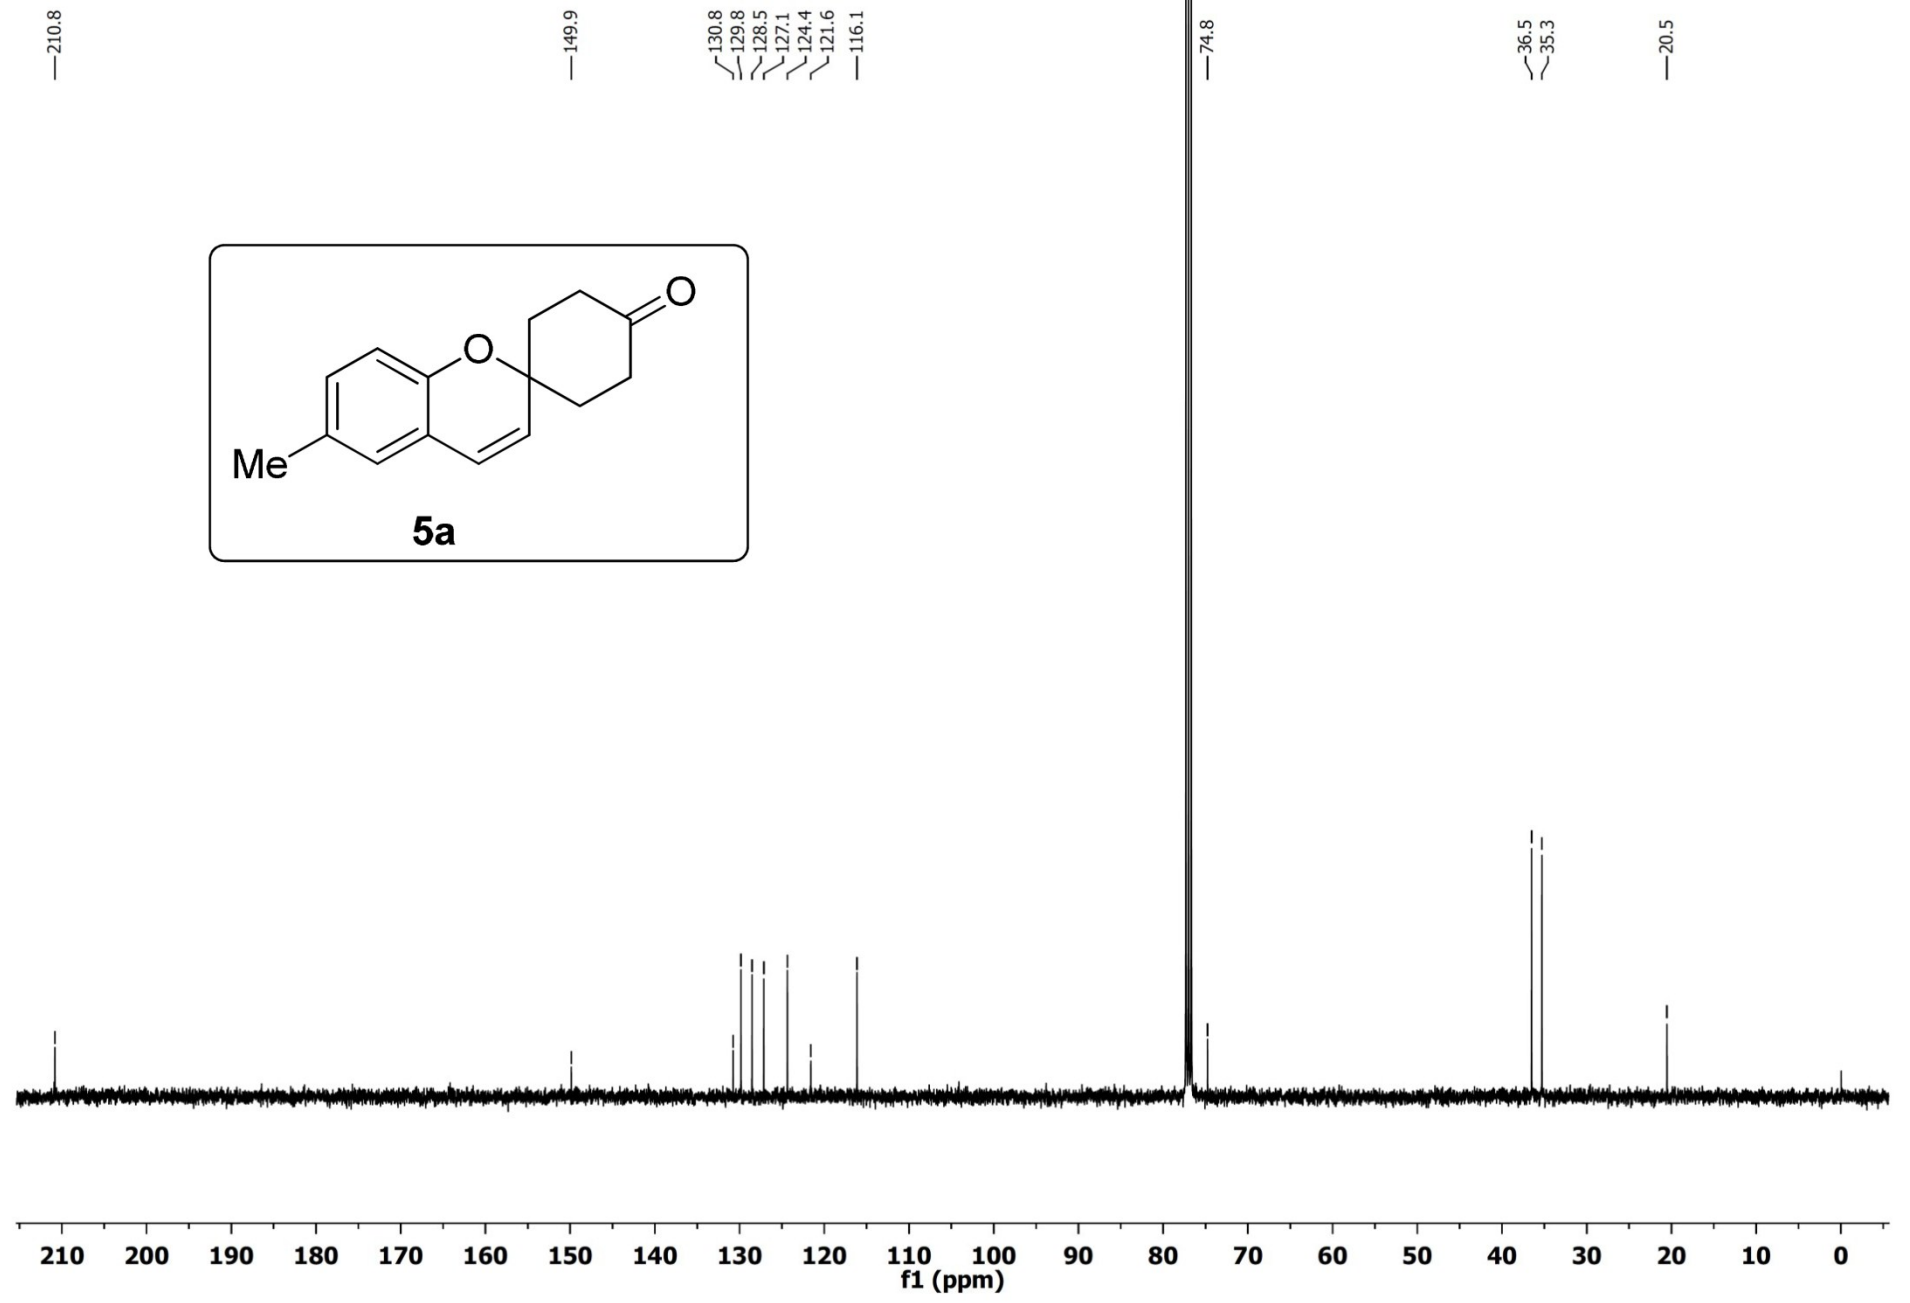

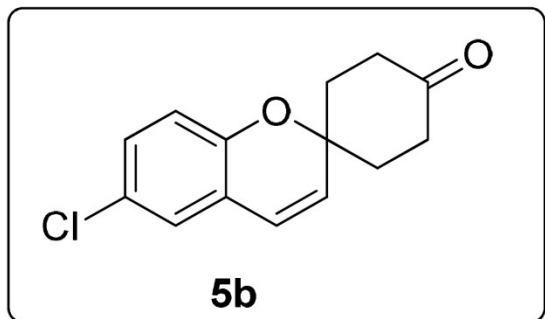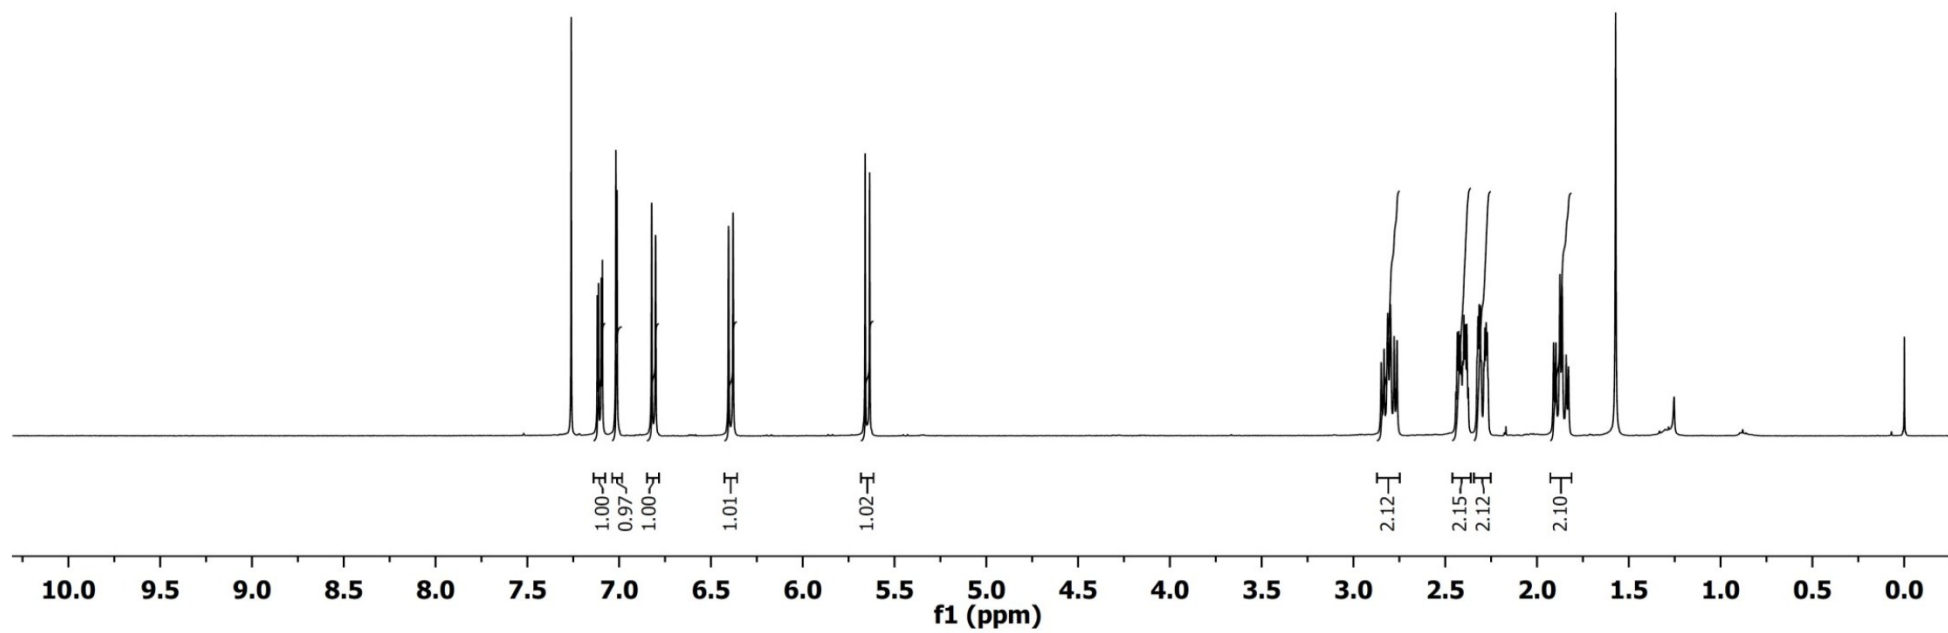



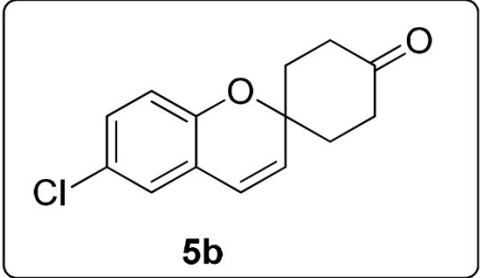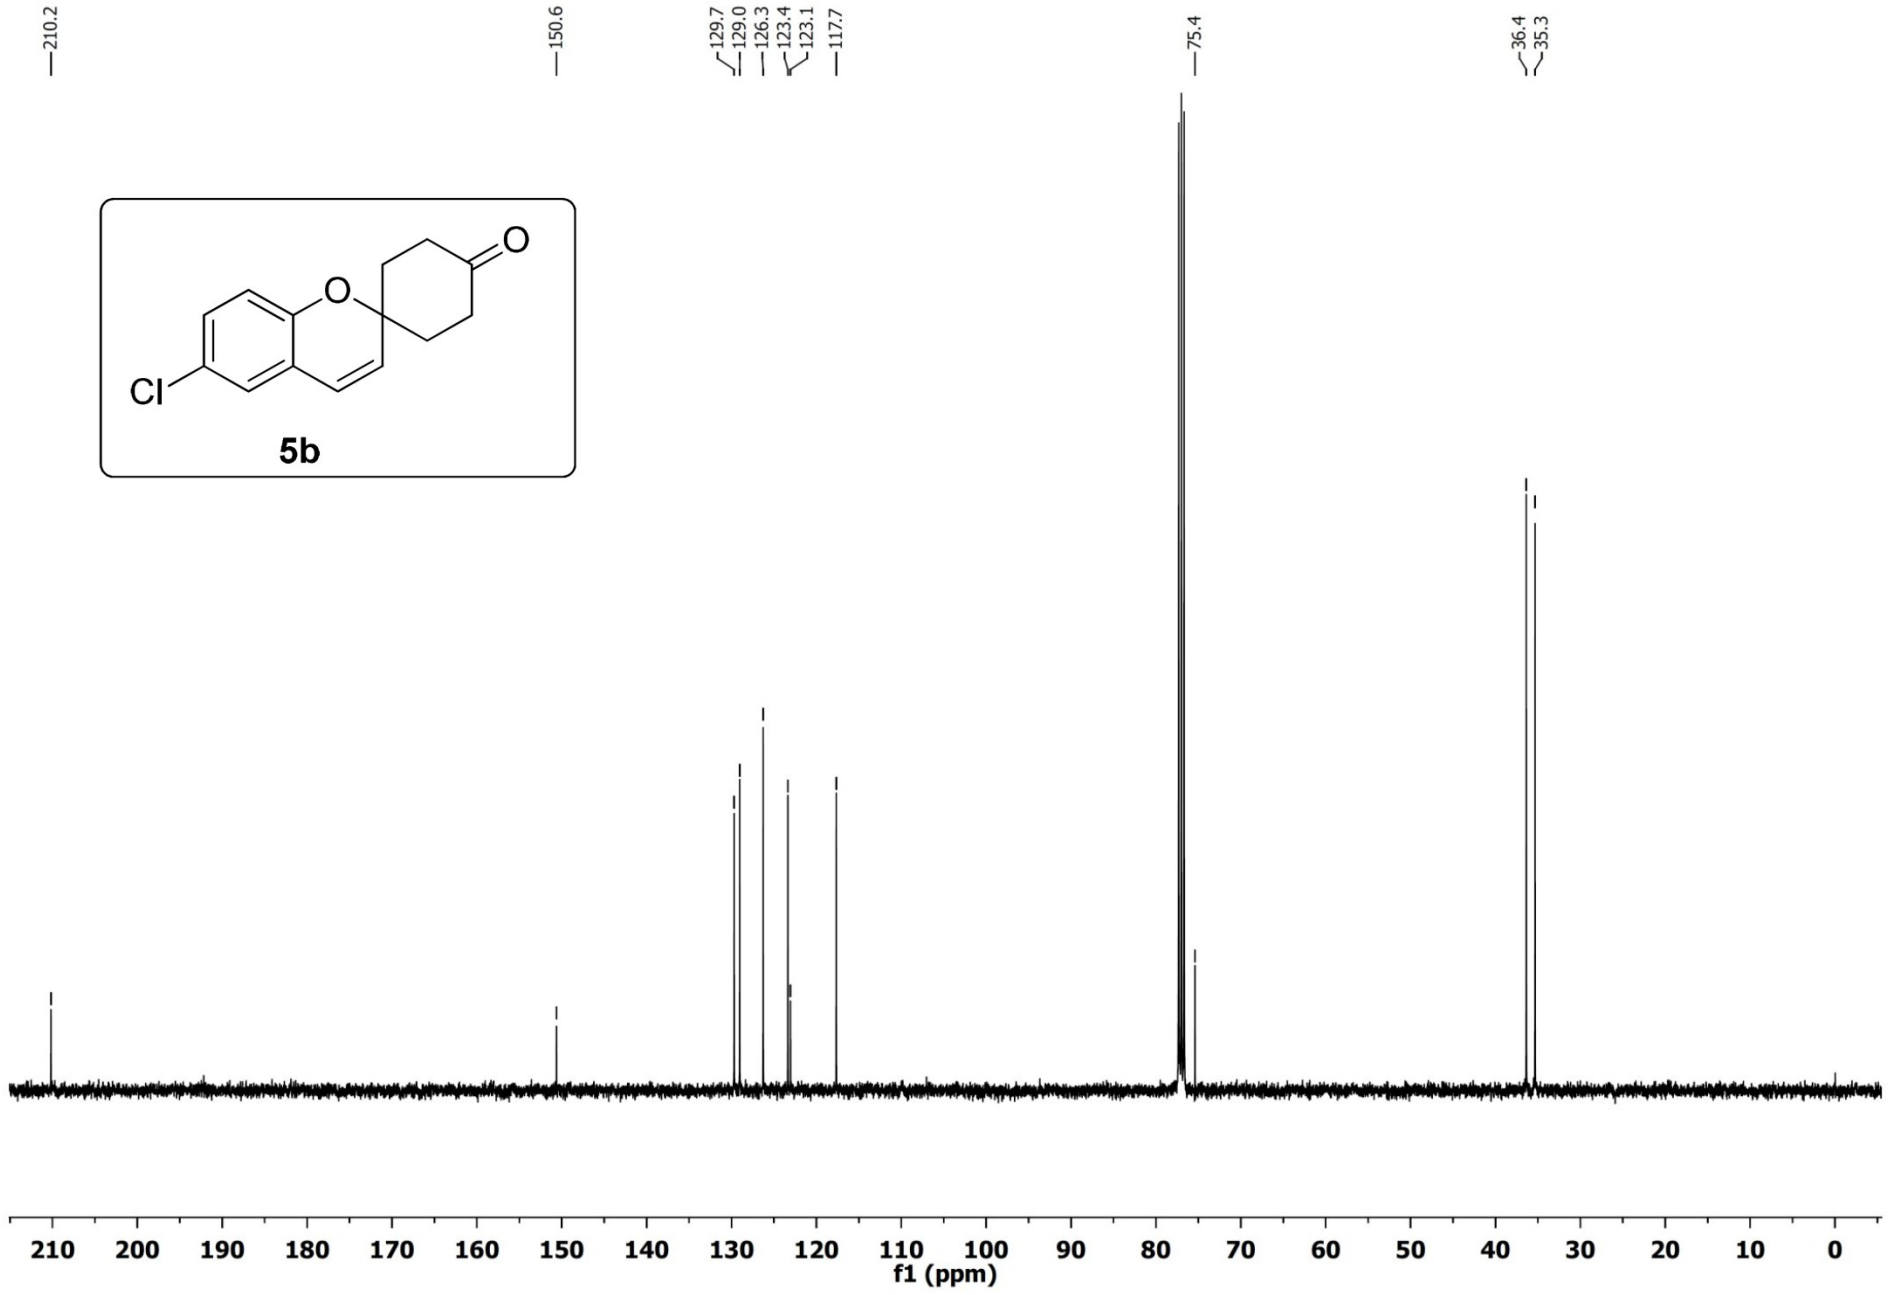

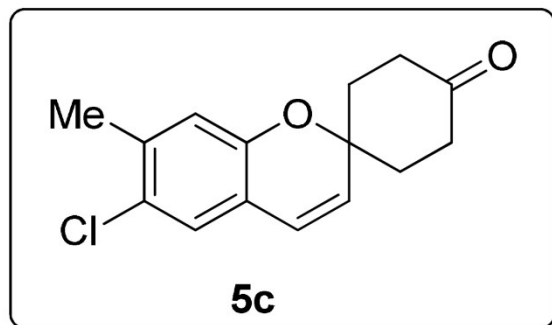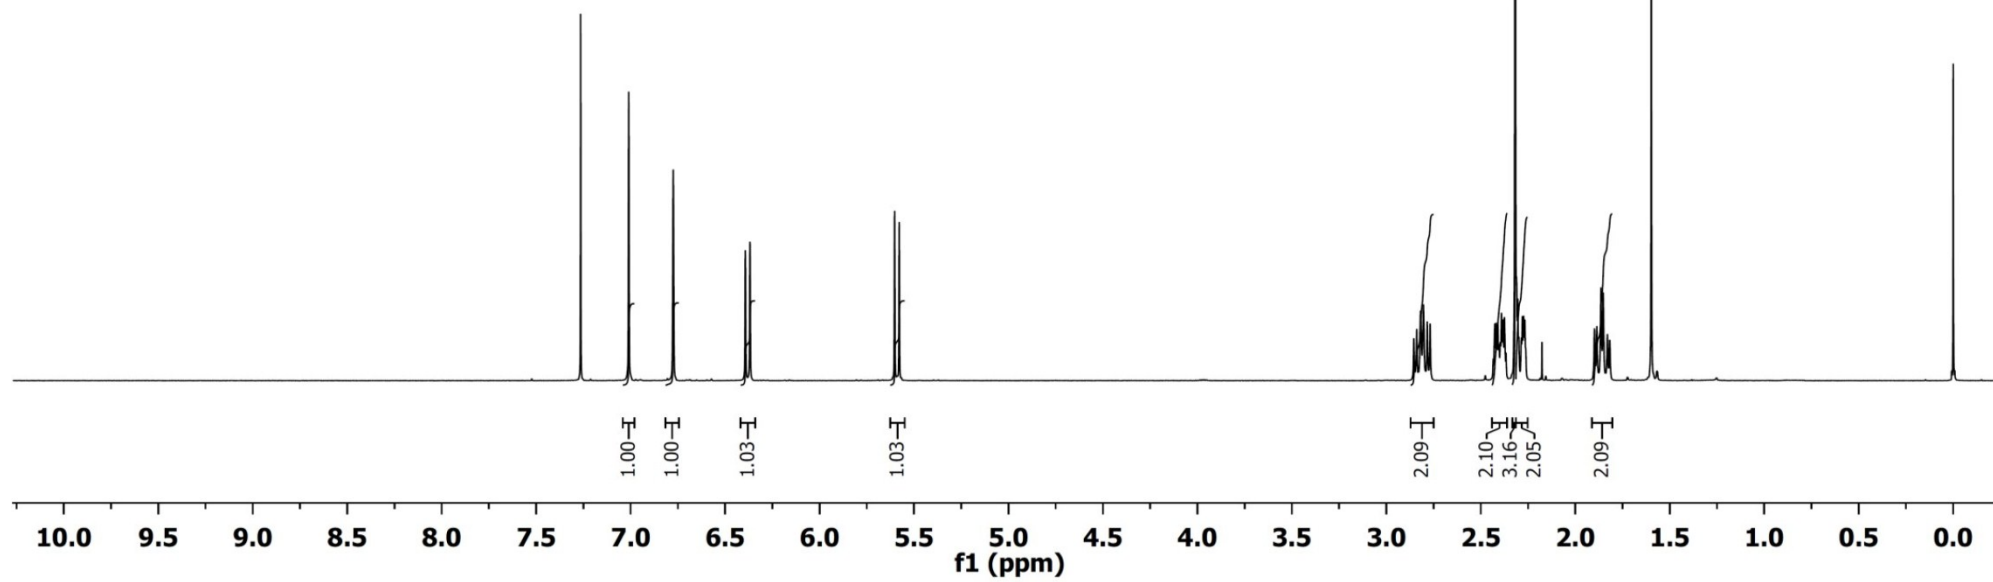

—210.5

—150.5

—137.1

—128.7

—126.5

—126.4

—123.2

—120.9

—118.7

—75.2

—36.4

—35.3

—20.1

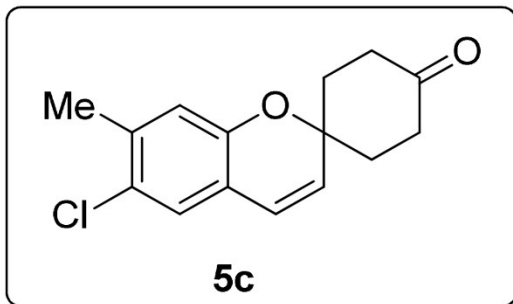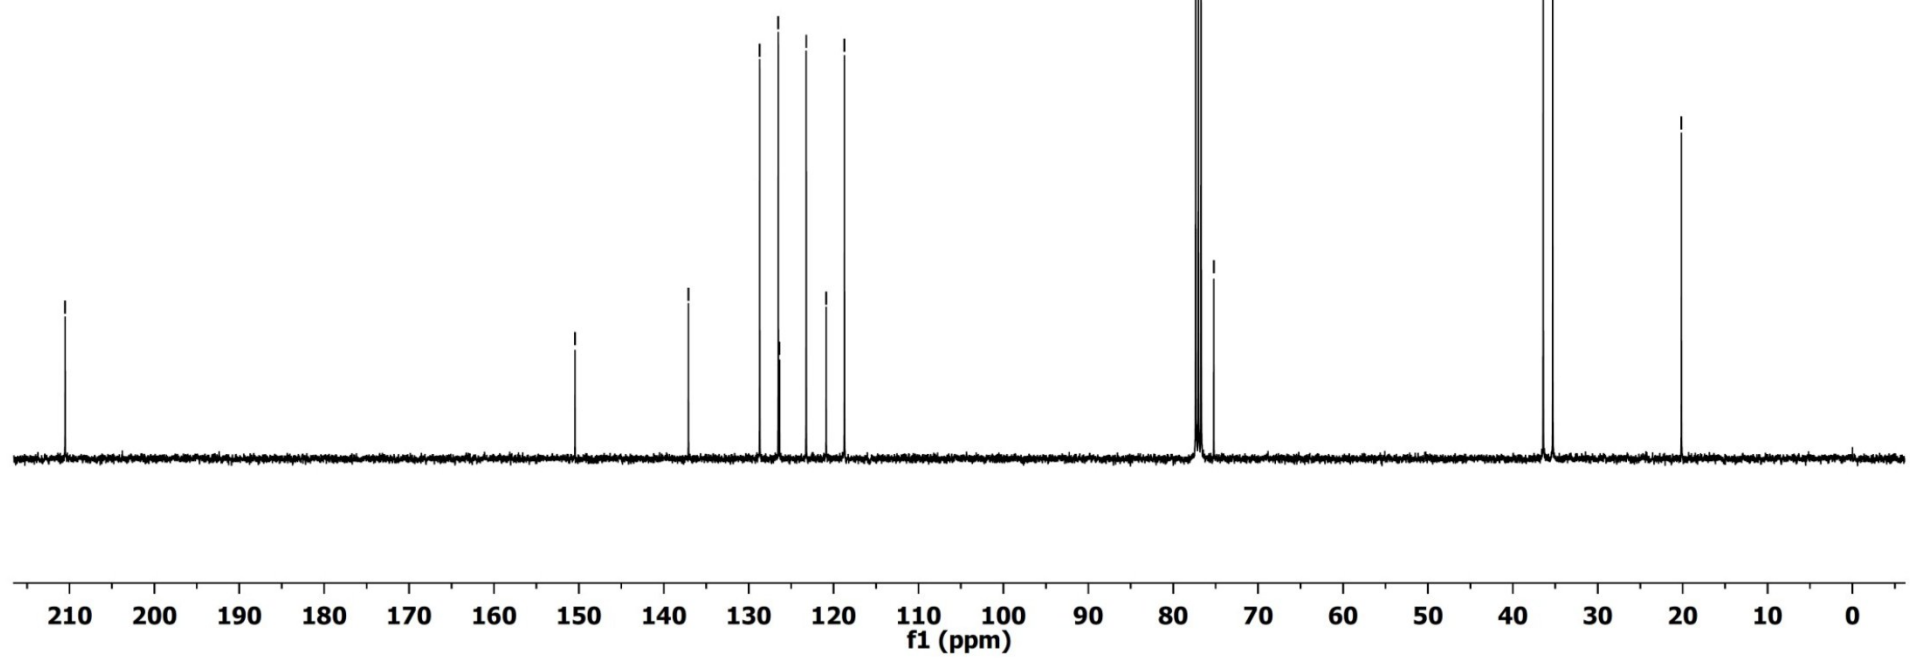

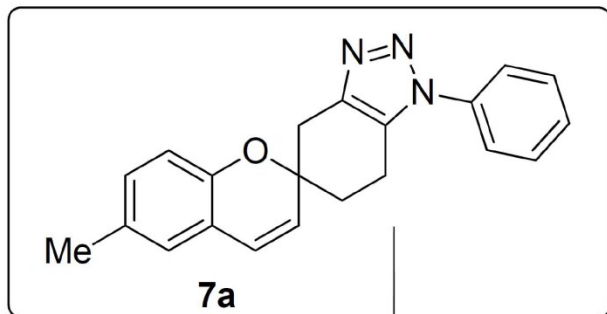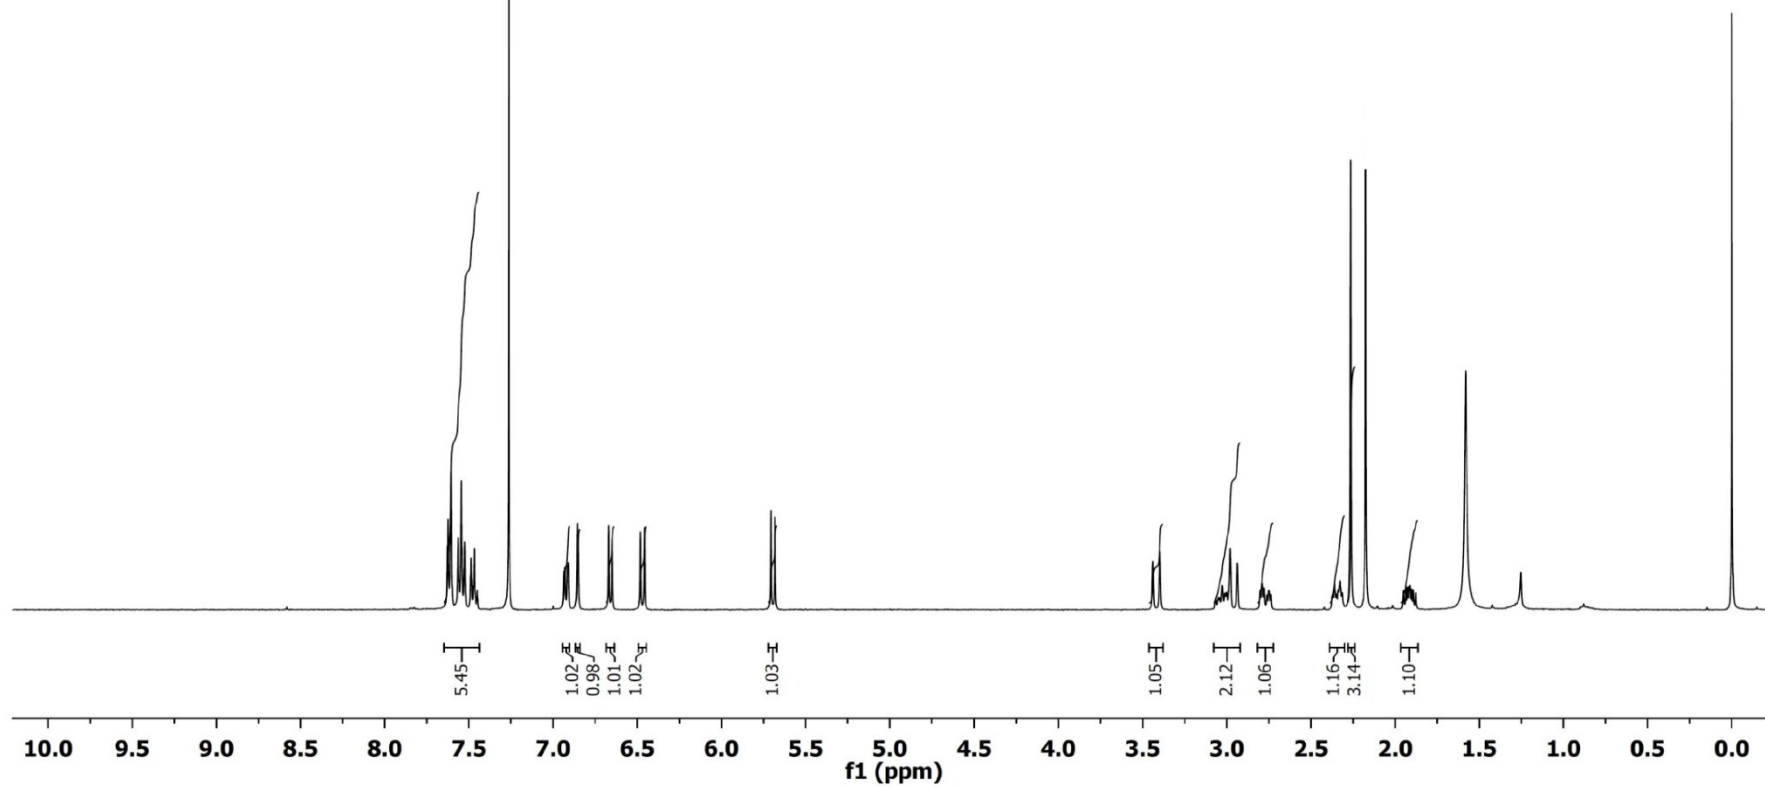

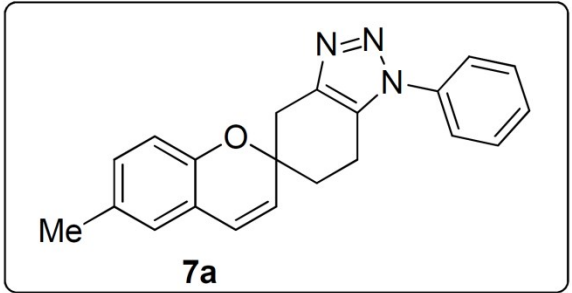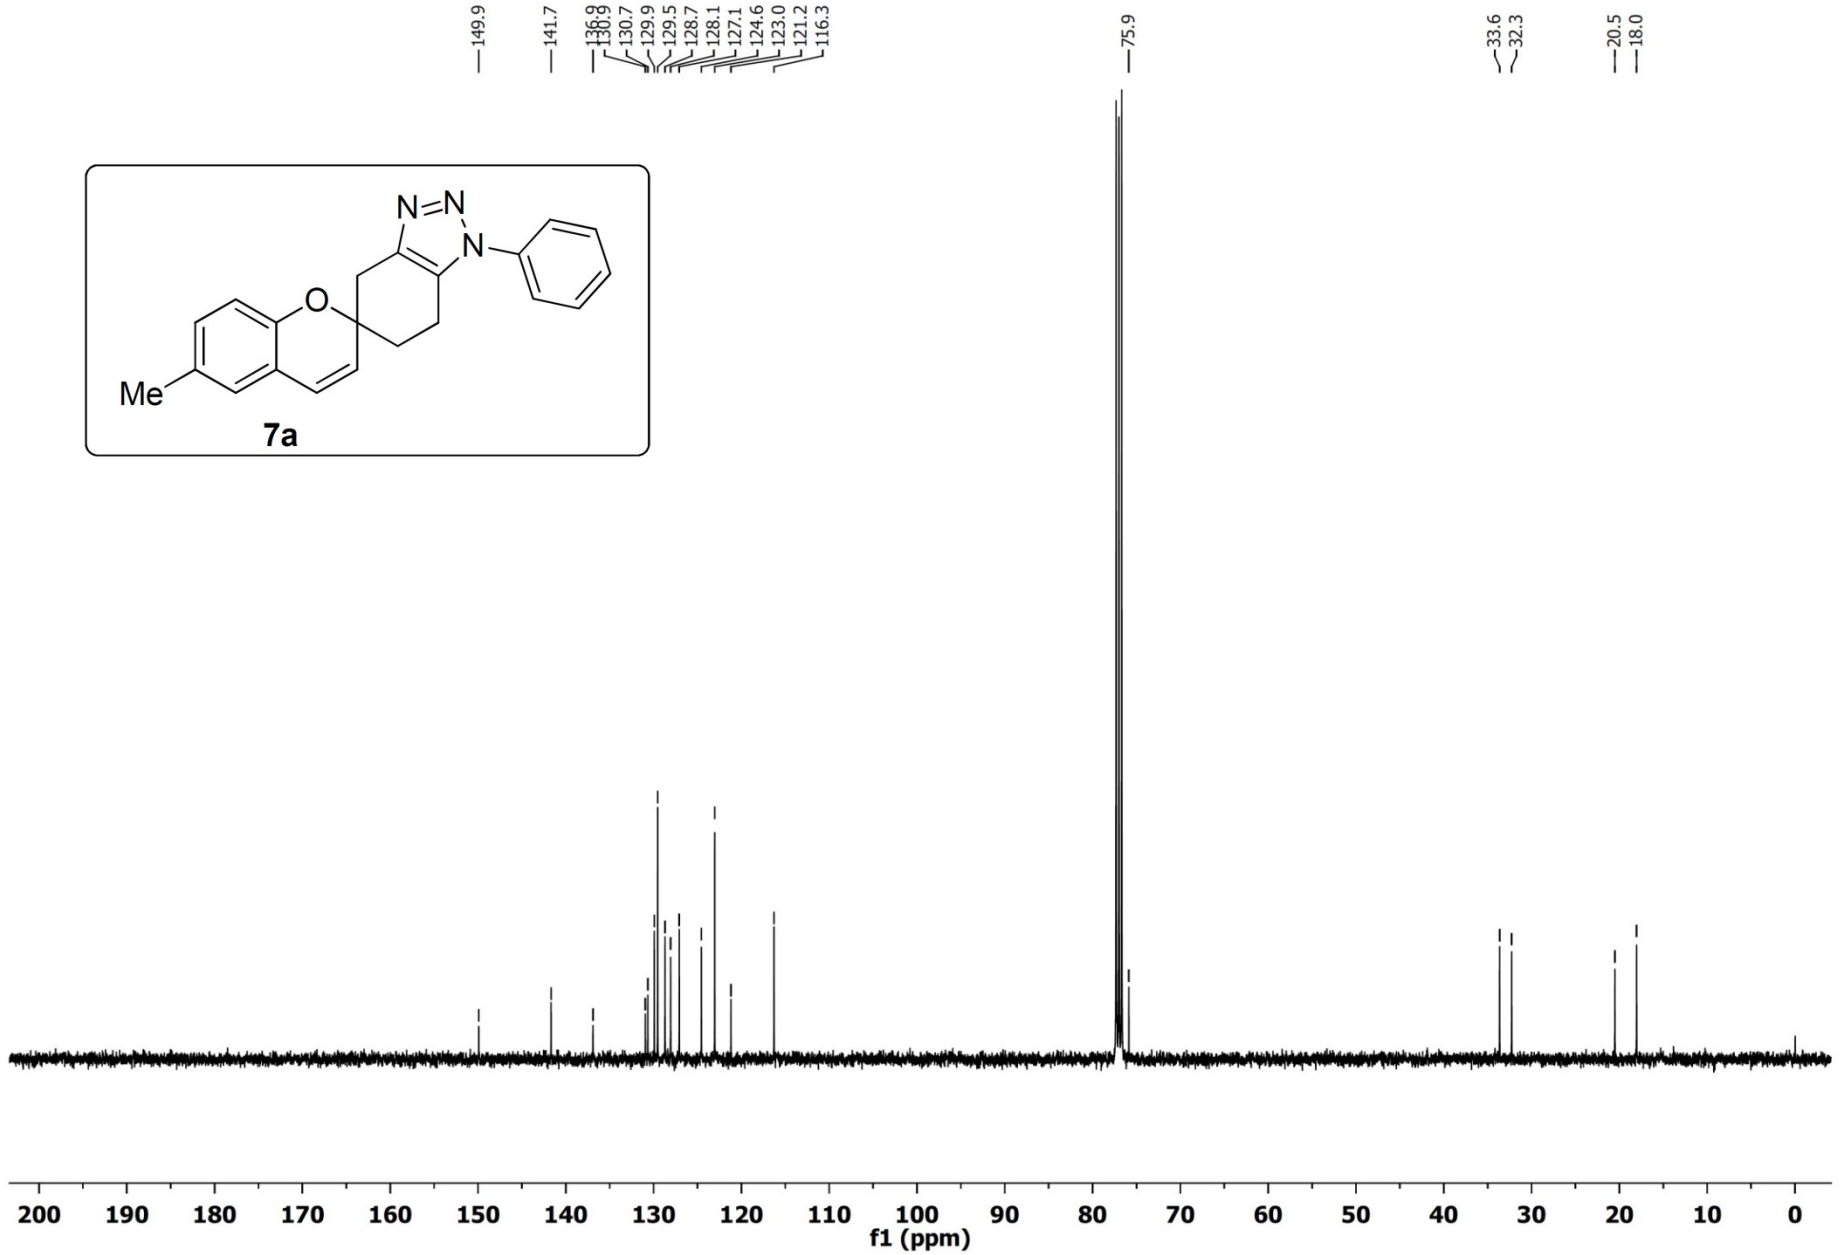

329 21 (0.388)

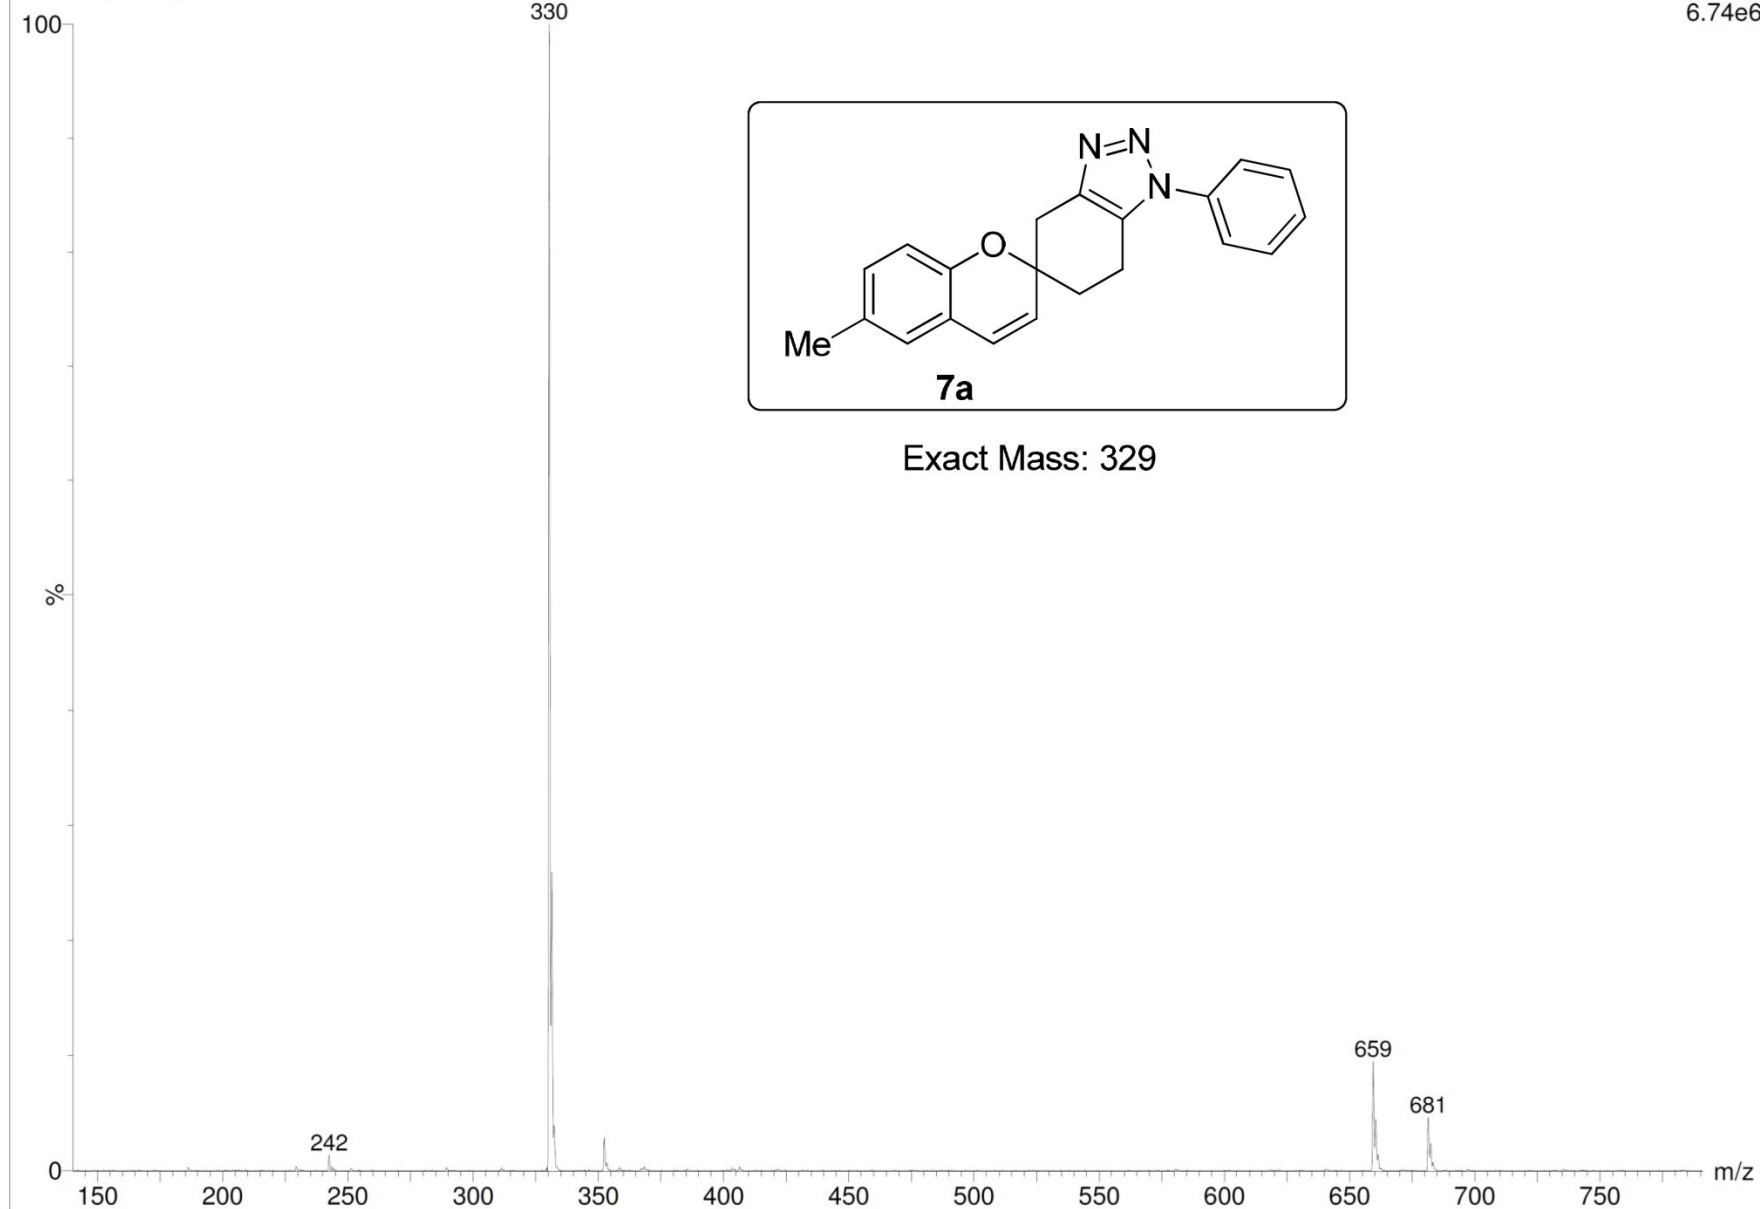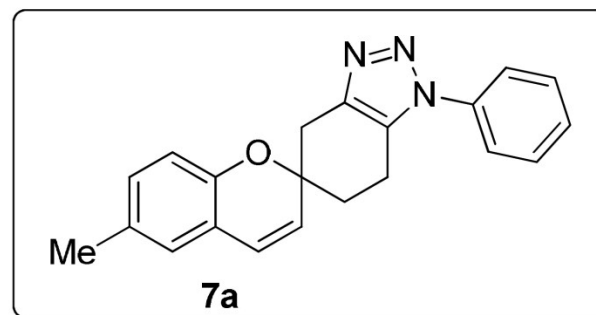

Exact Mass: 329

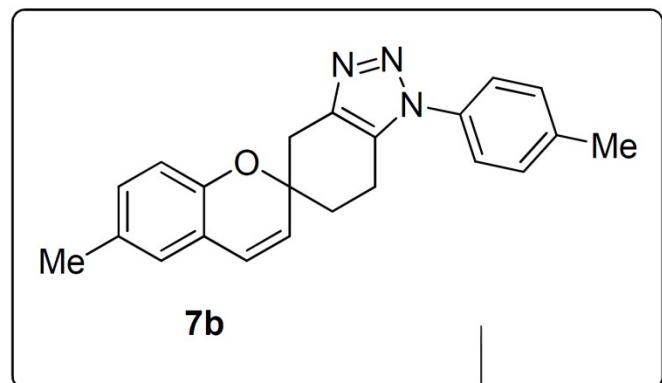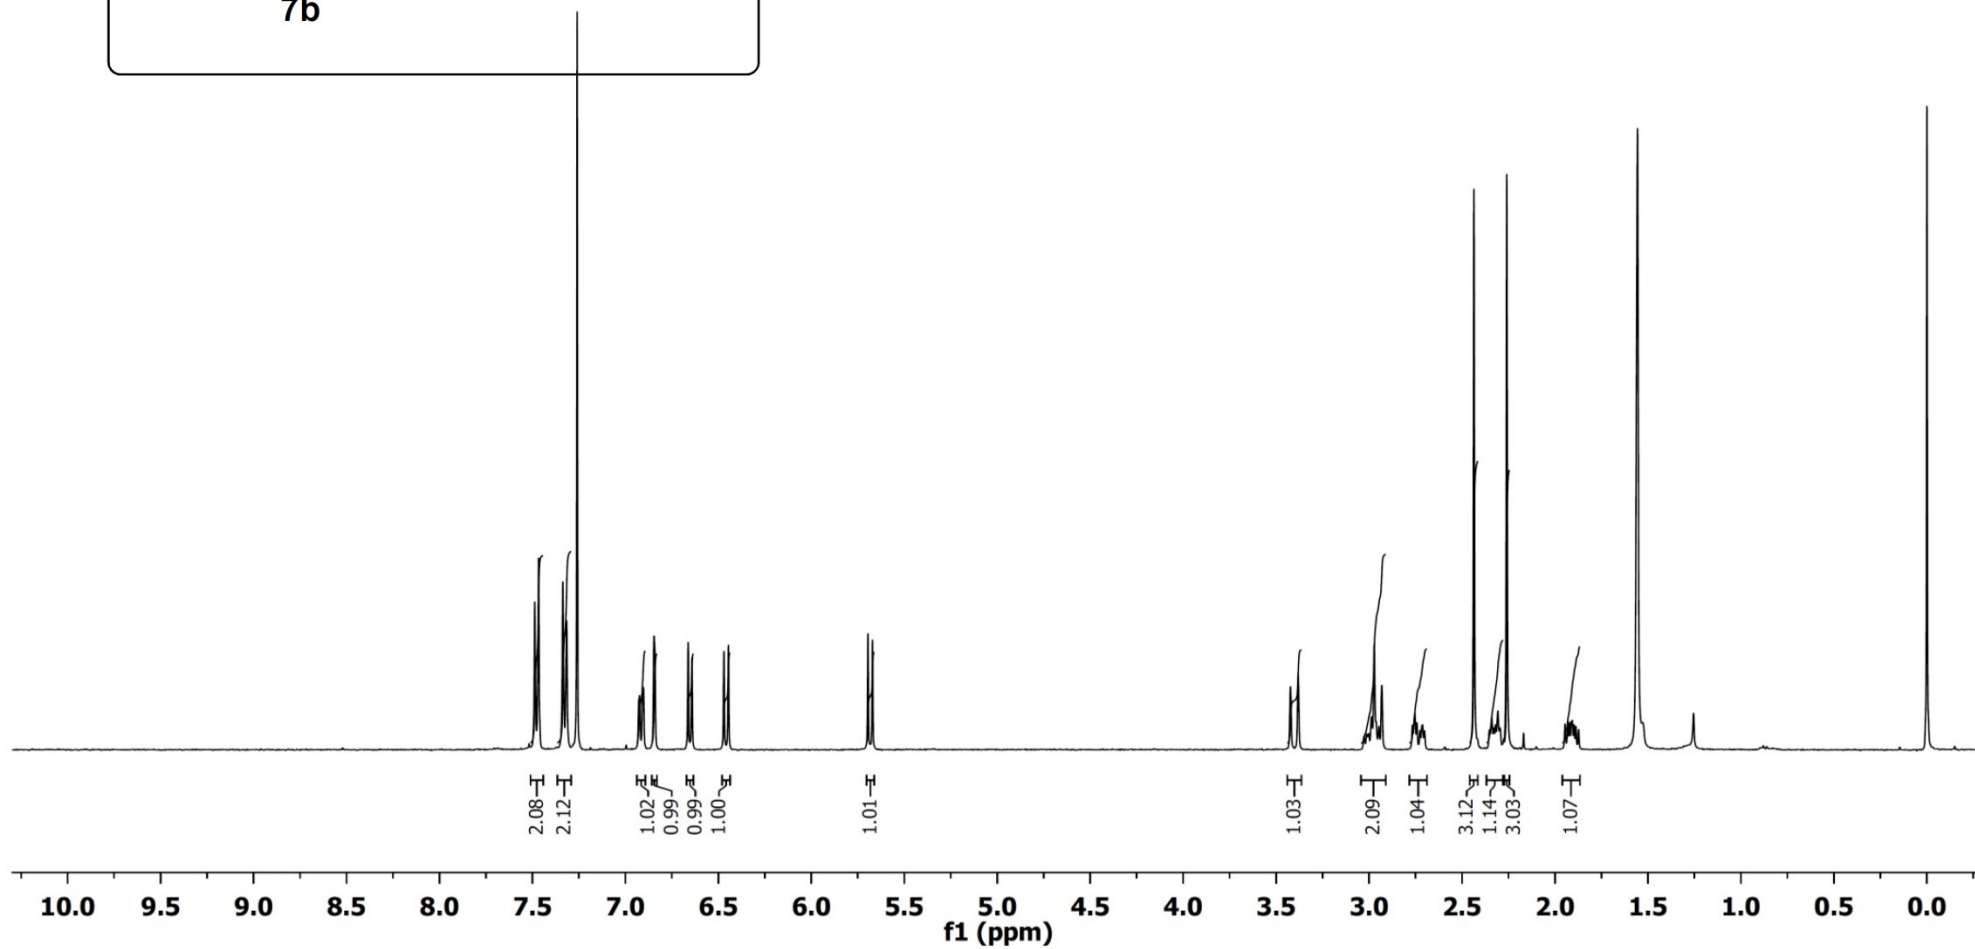

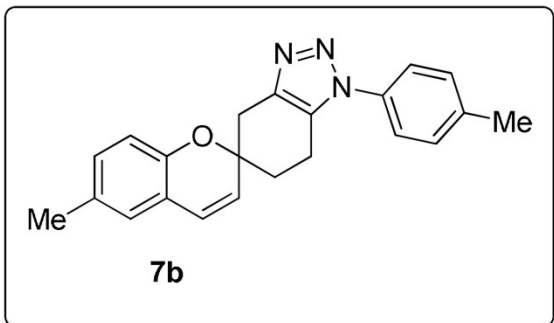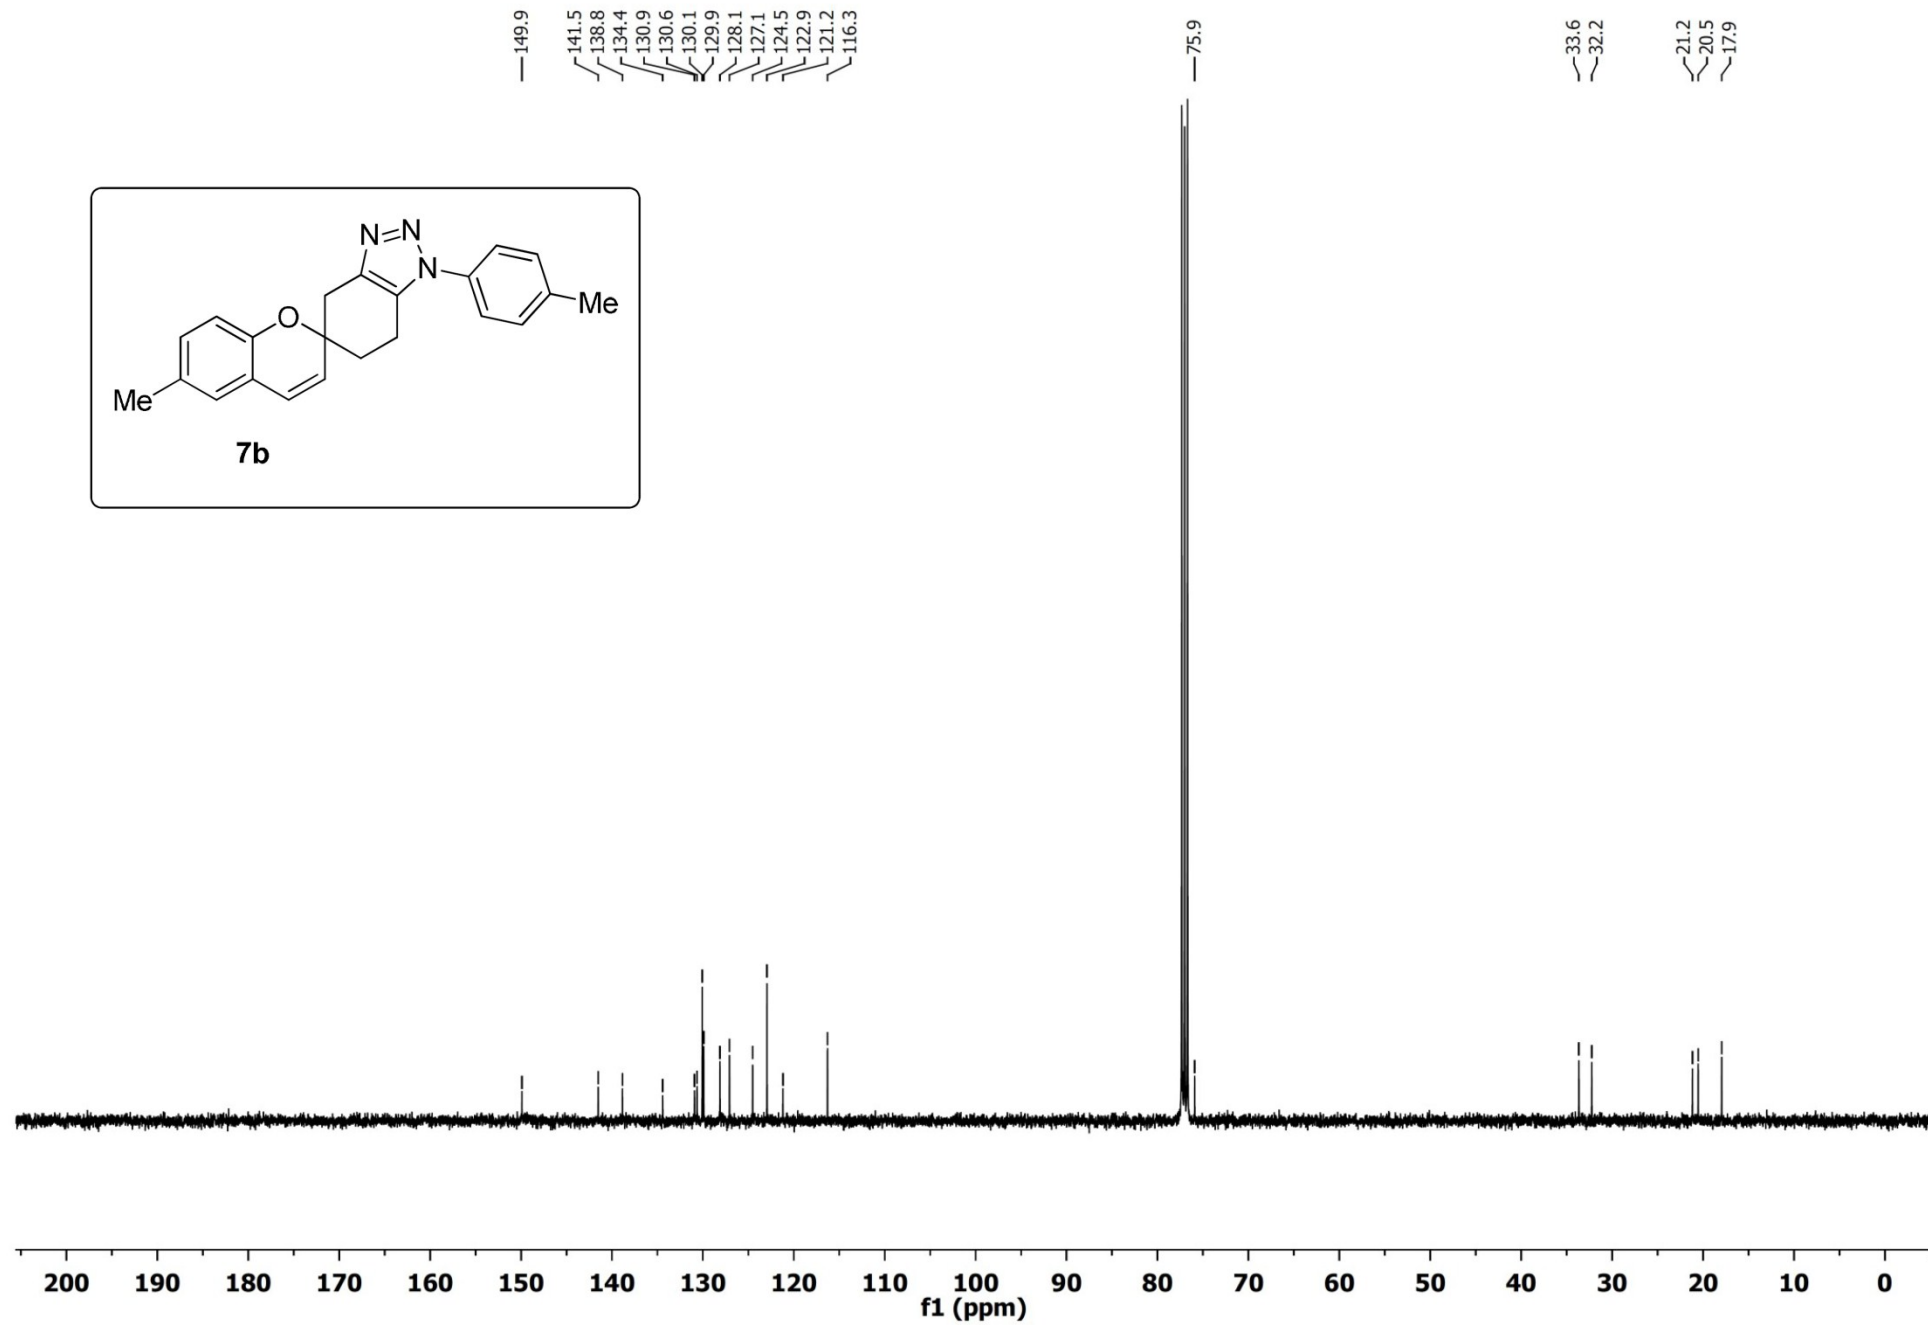



# MASS REPORT

Sample Name : PSH-5-343  
Data File : 141217.30.lcd  
Date Acquired : 12/14/2017 1:54:57 PM  
Batch File : 14-12-17.lcb

MS Spectrum  
D:\DATA\DEC-17\141217.30.lcd

Averaged ESI Positive+  
Spectrum Mode: Averaged 0.210-0.452(102-218)

[CPS]

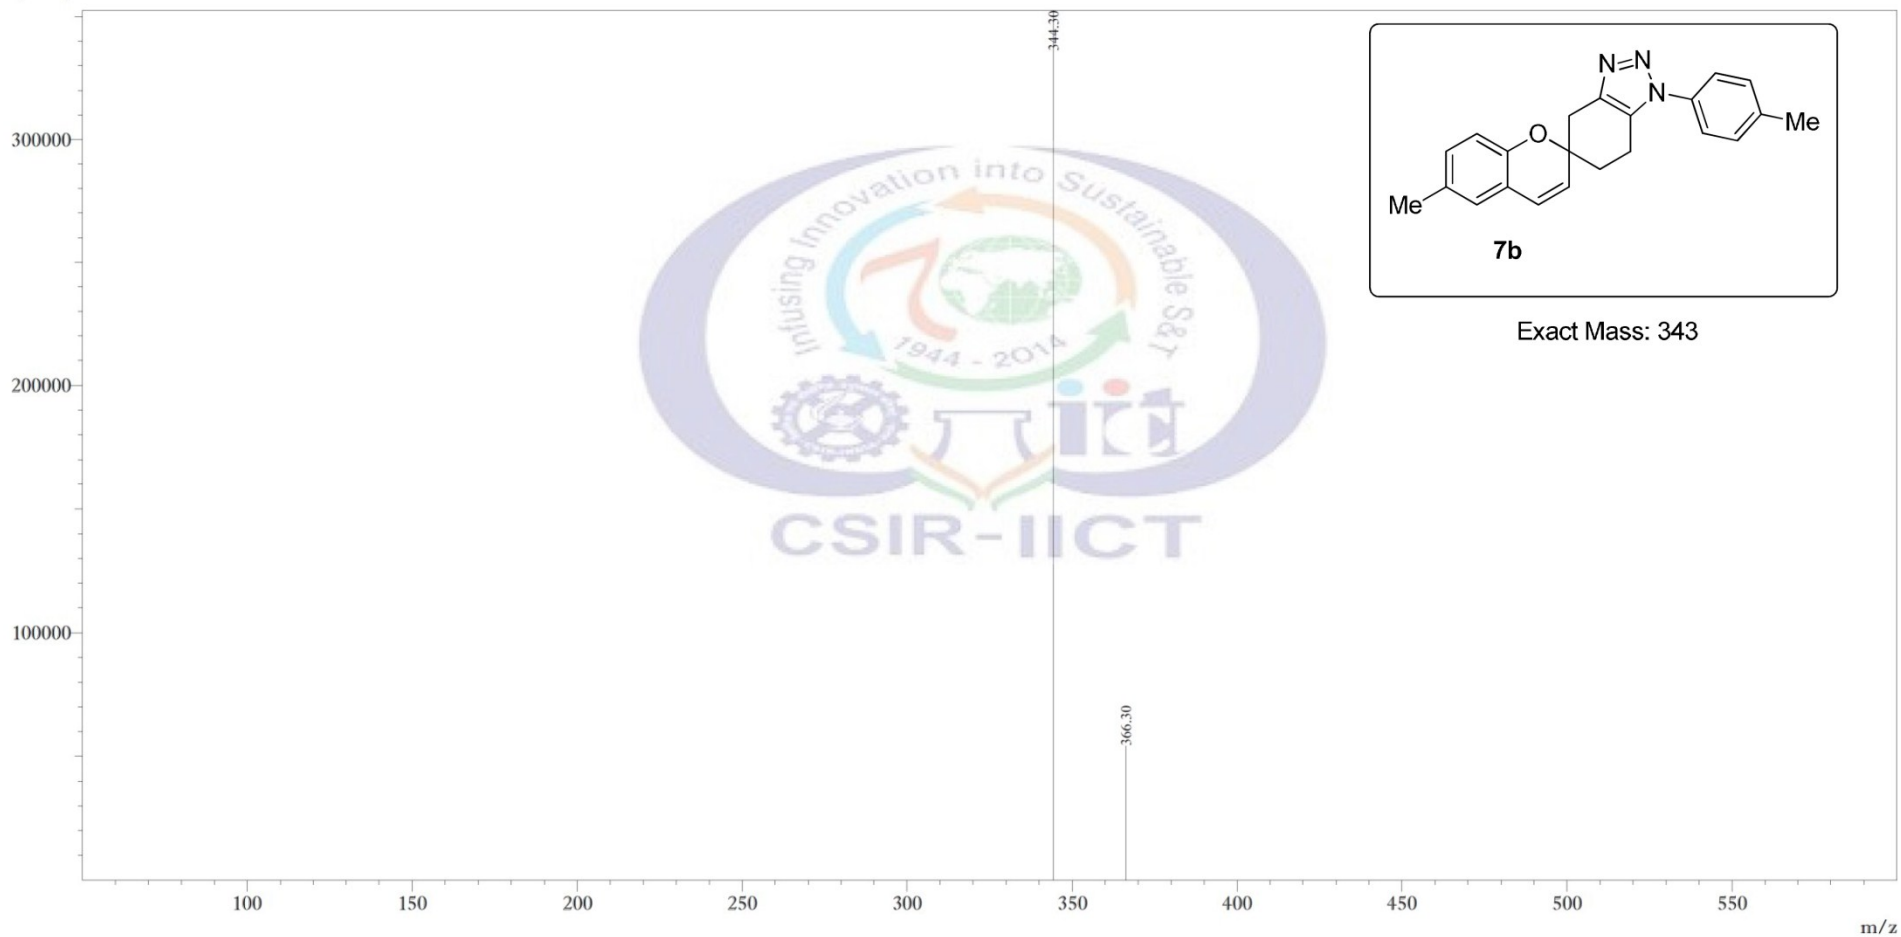

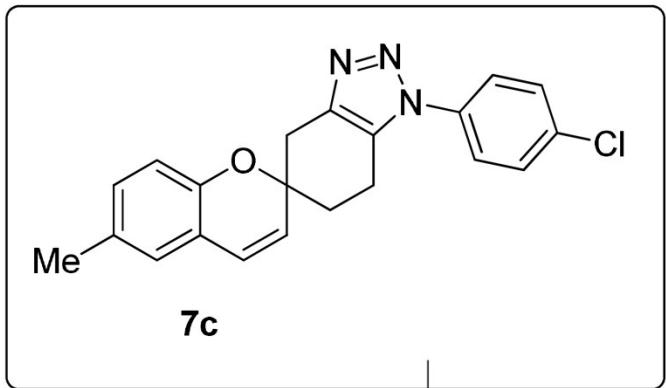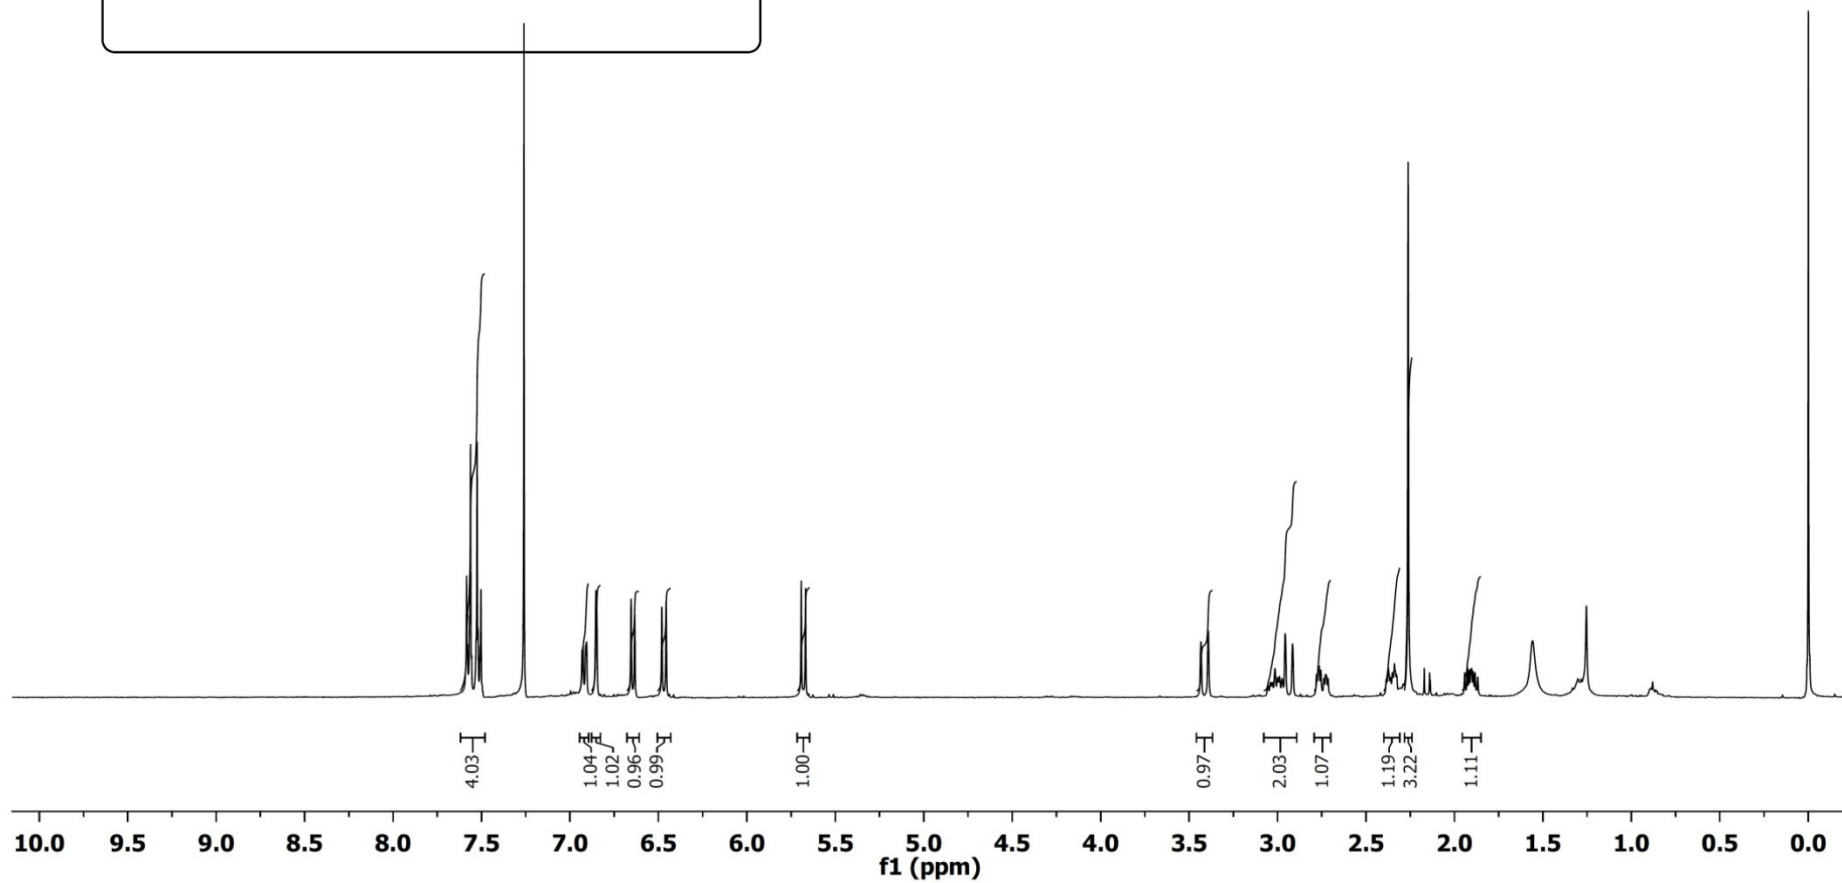

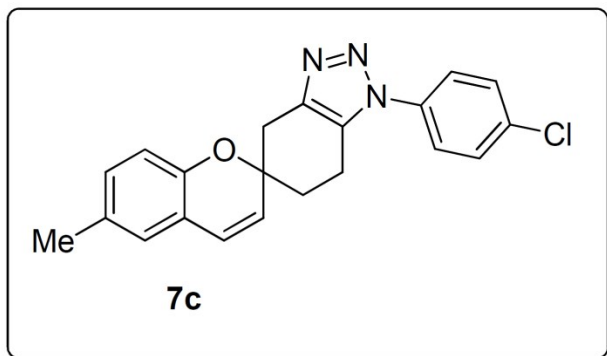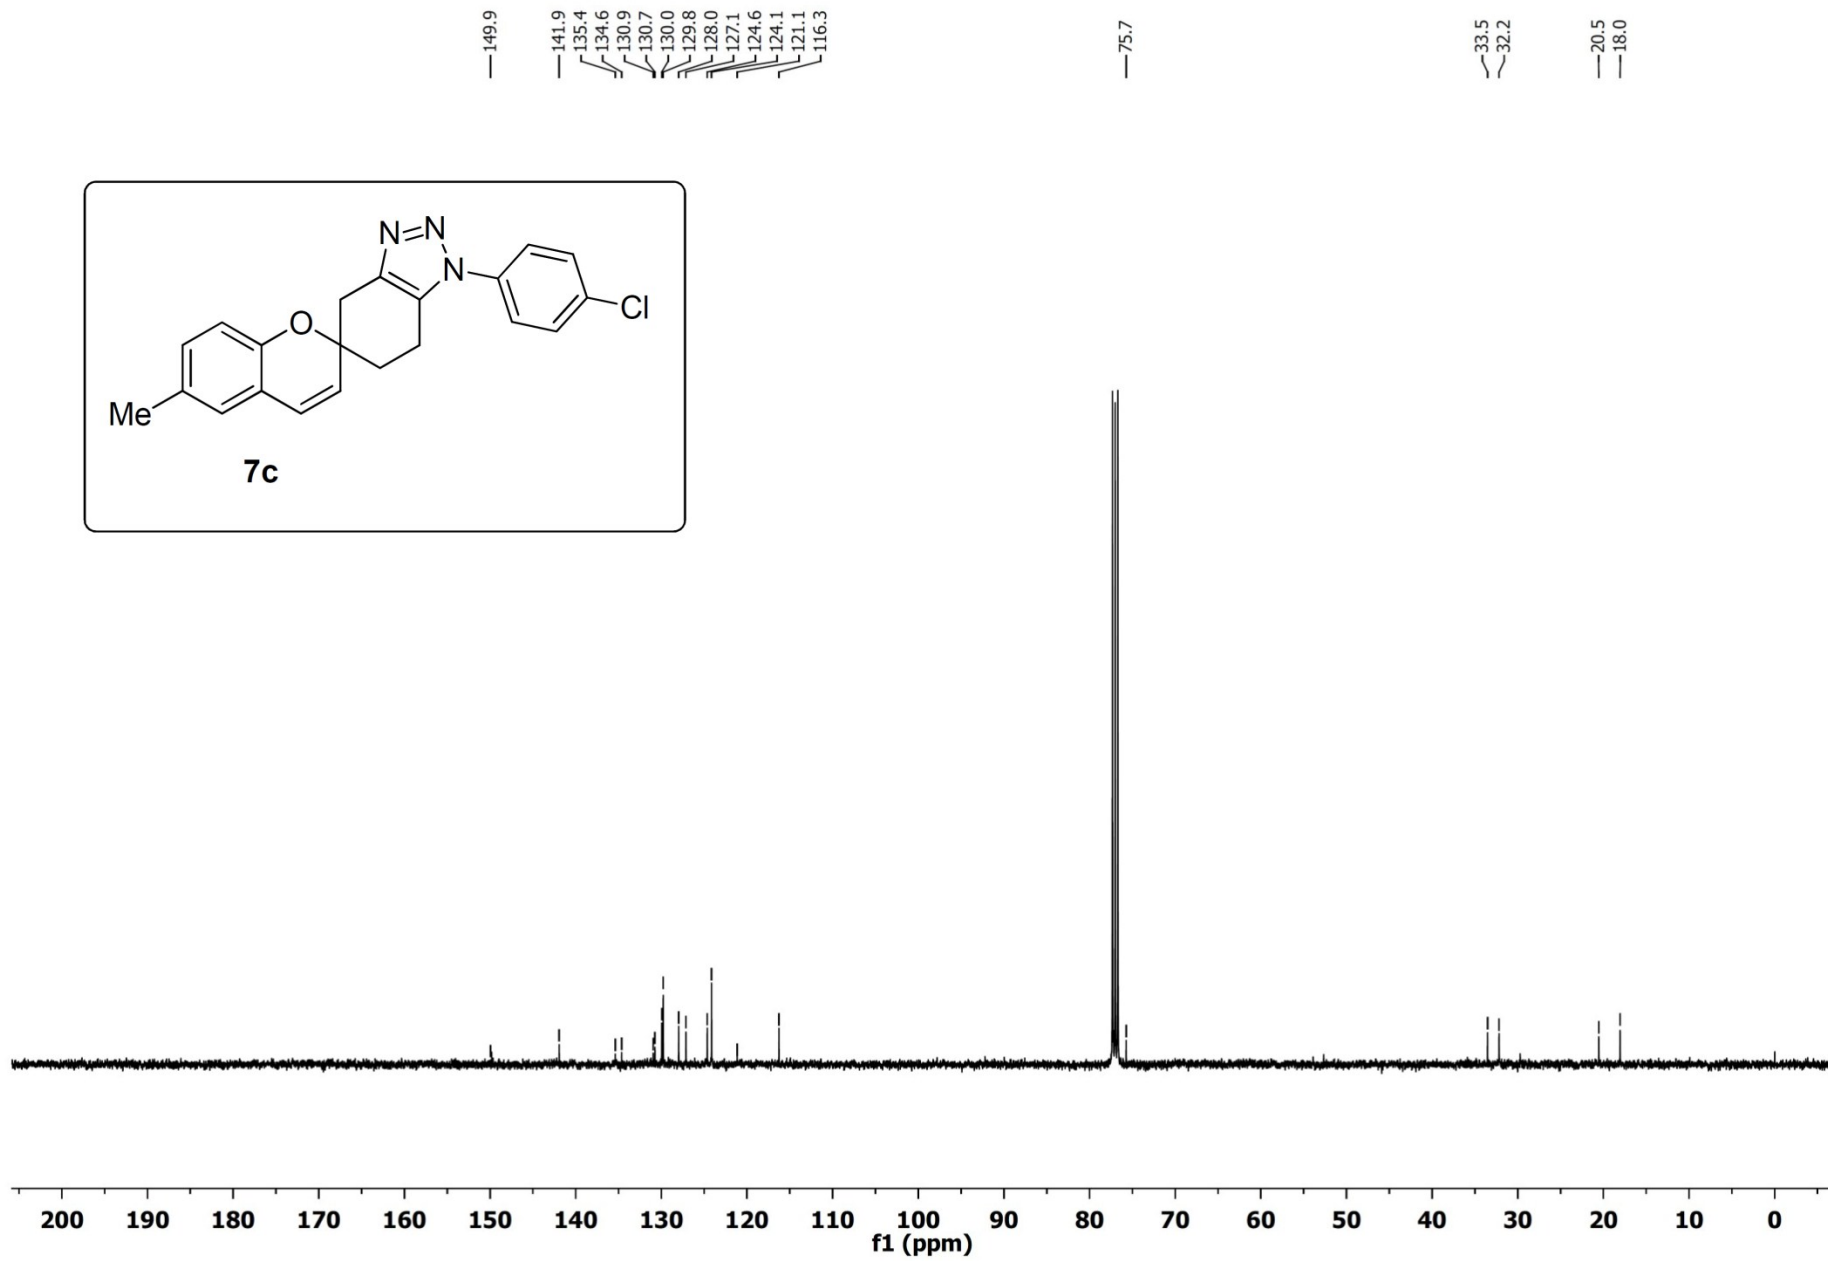

# MASS REPORT

Sample Name : PSH-4-363  
 Data File : 141217.32.lcd  
 Date Acquired : 12/14/2017 1:58:10 PM  
 Batch File : 14-12-17.lcb

MS Spectrum  
 D:\DATA\DEC-17\141217.32.lcd

Averaged ESI Positive+  
 Spectrum Mode: Averaged 0.233-0.454(113-219)  
 [CPS]

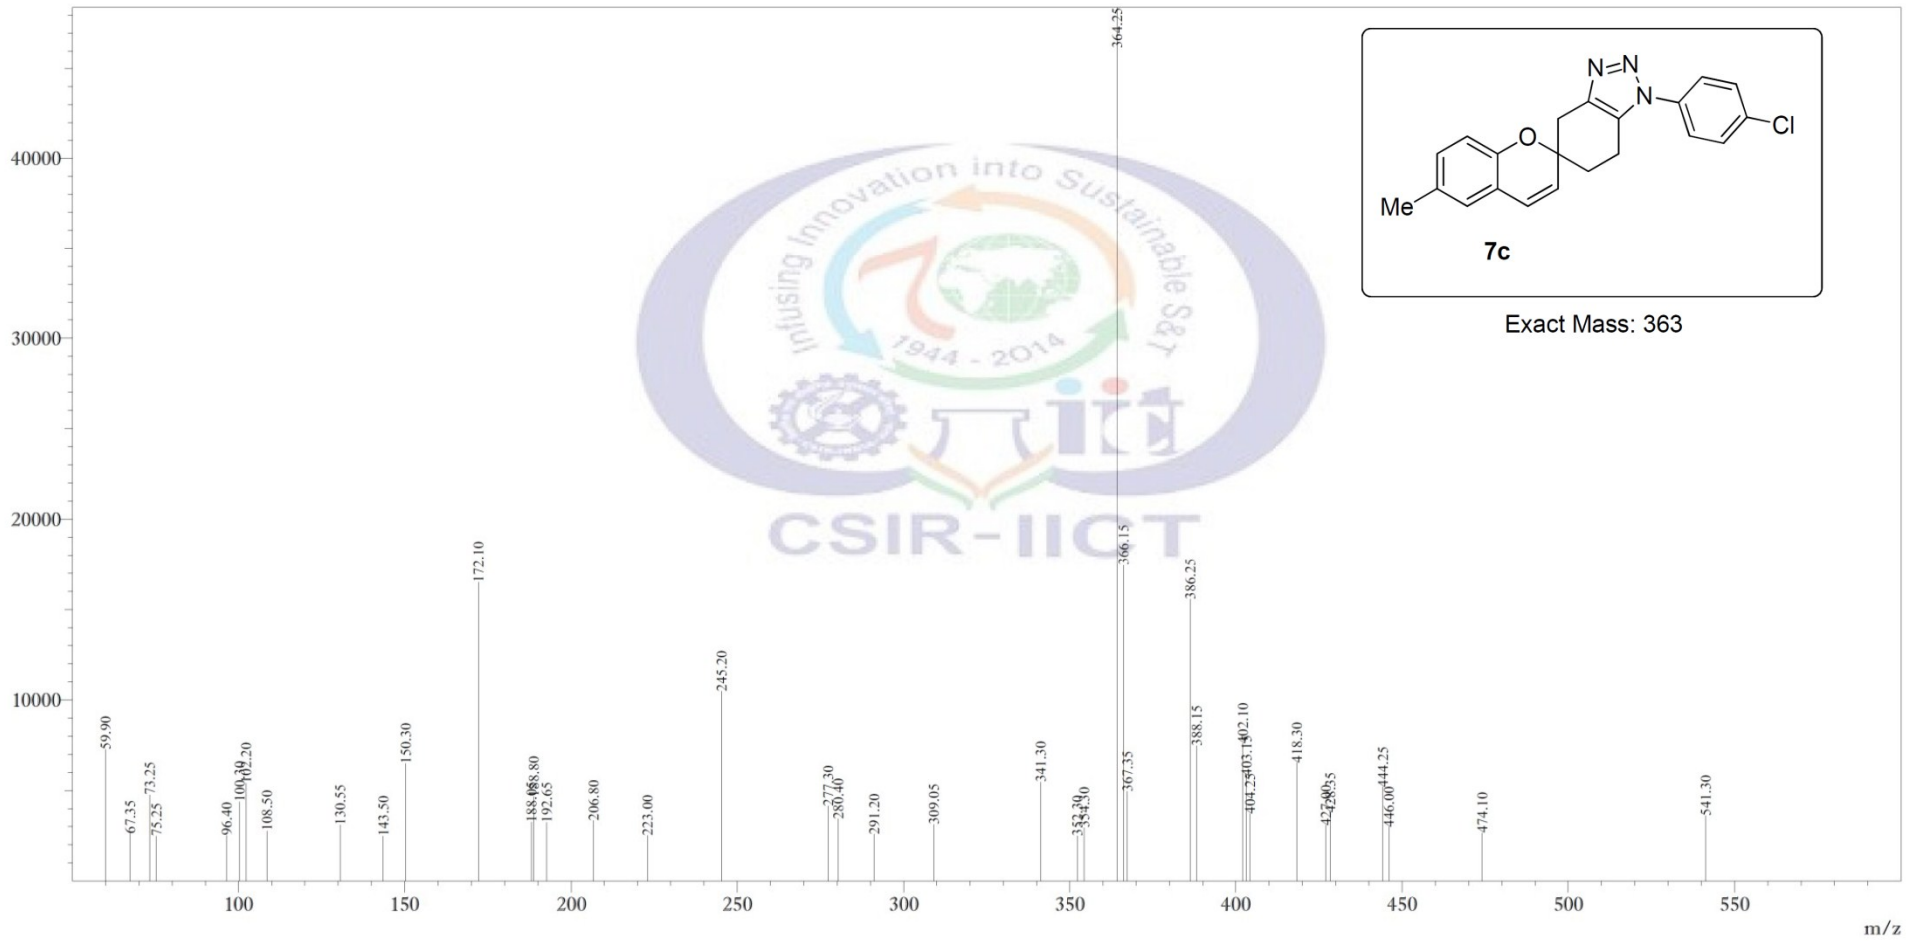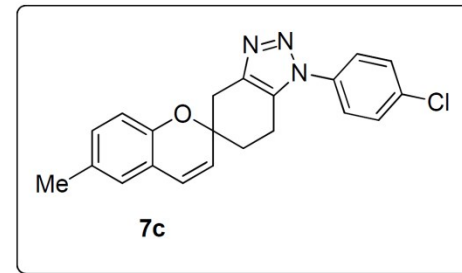

Exact Mass: 363

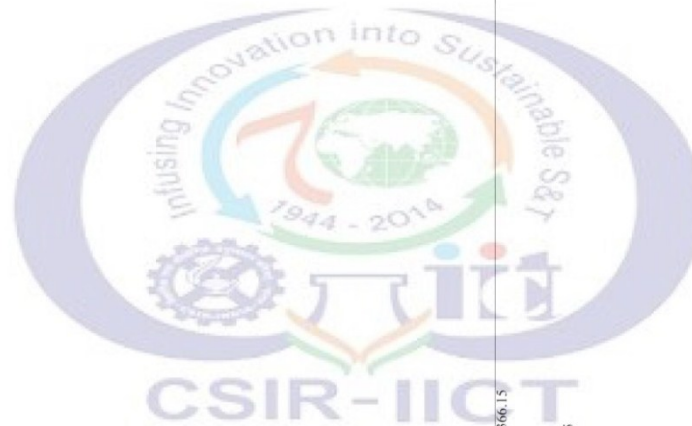

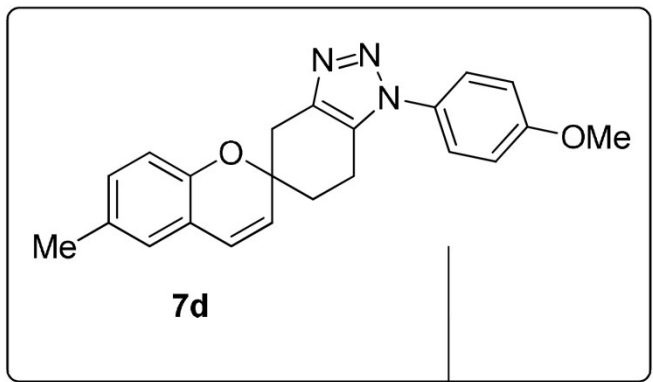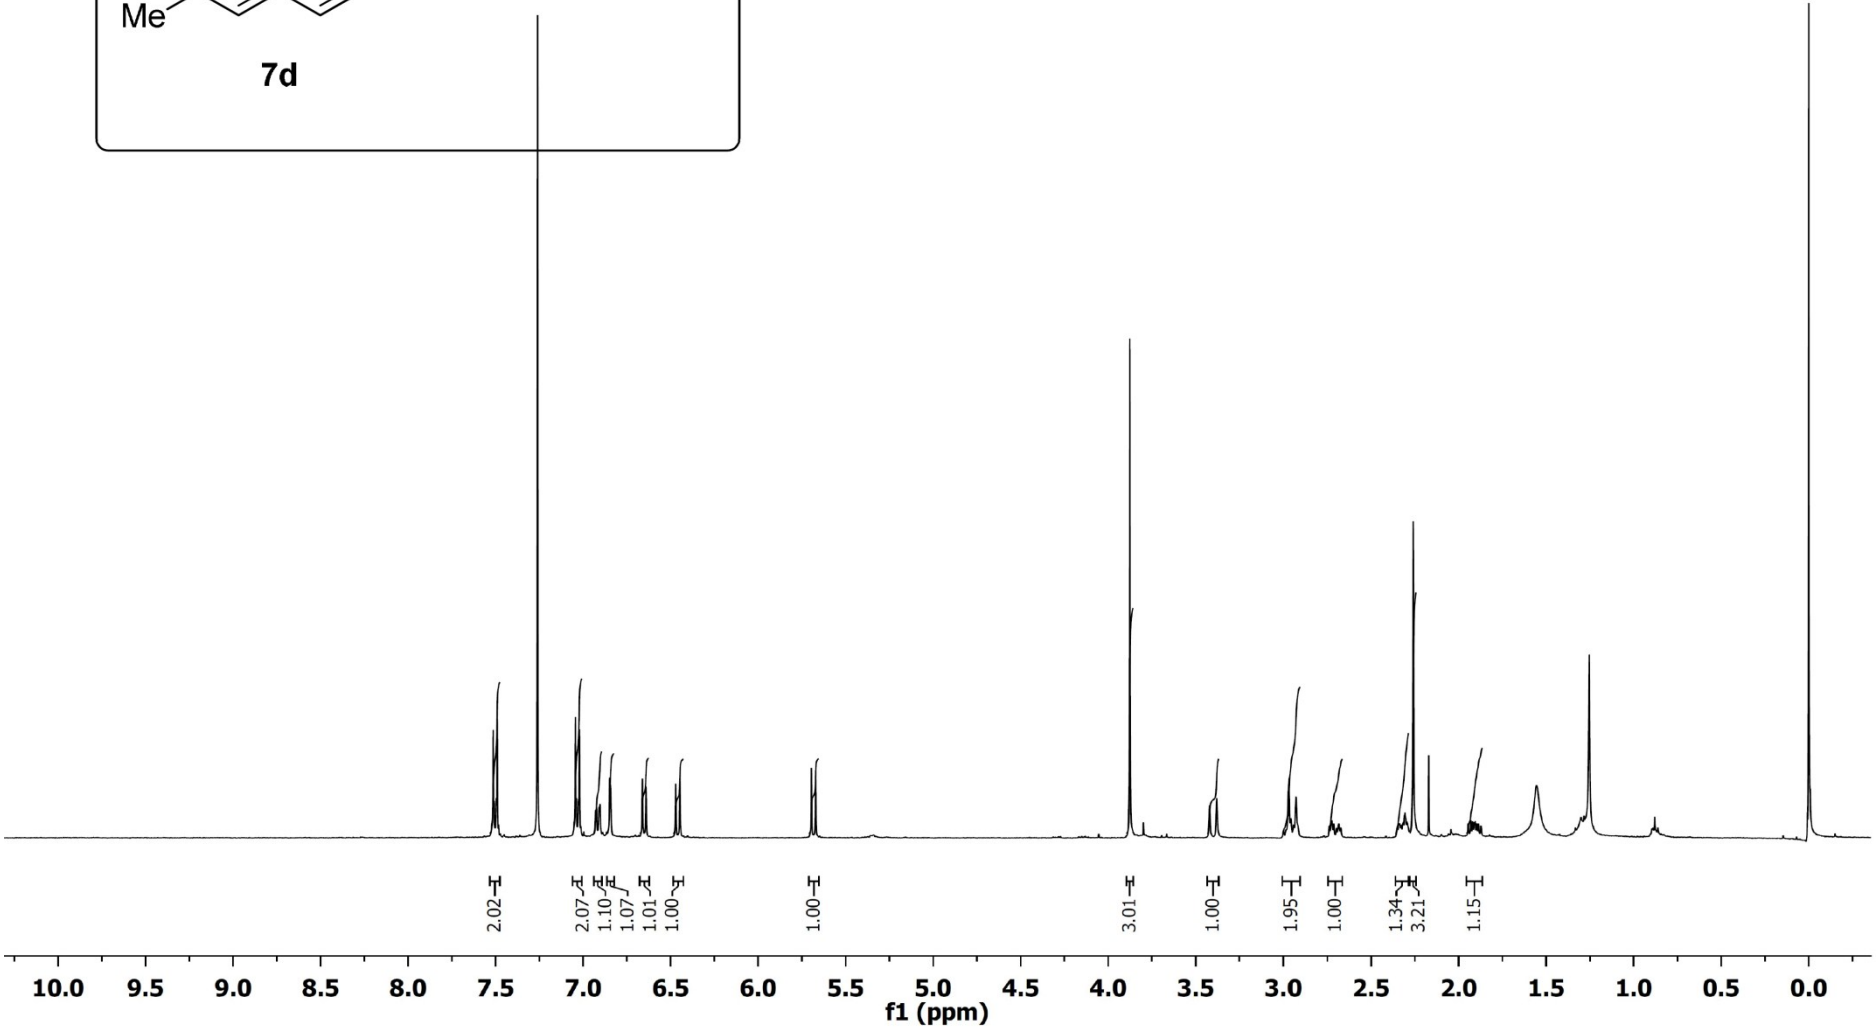

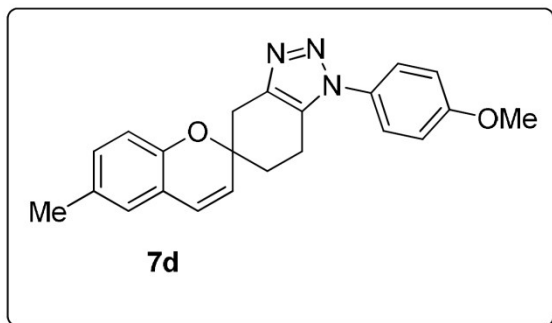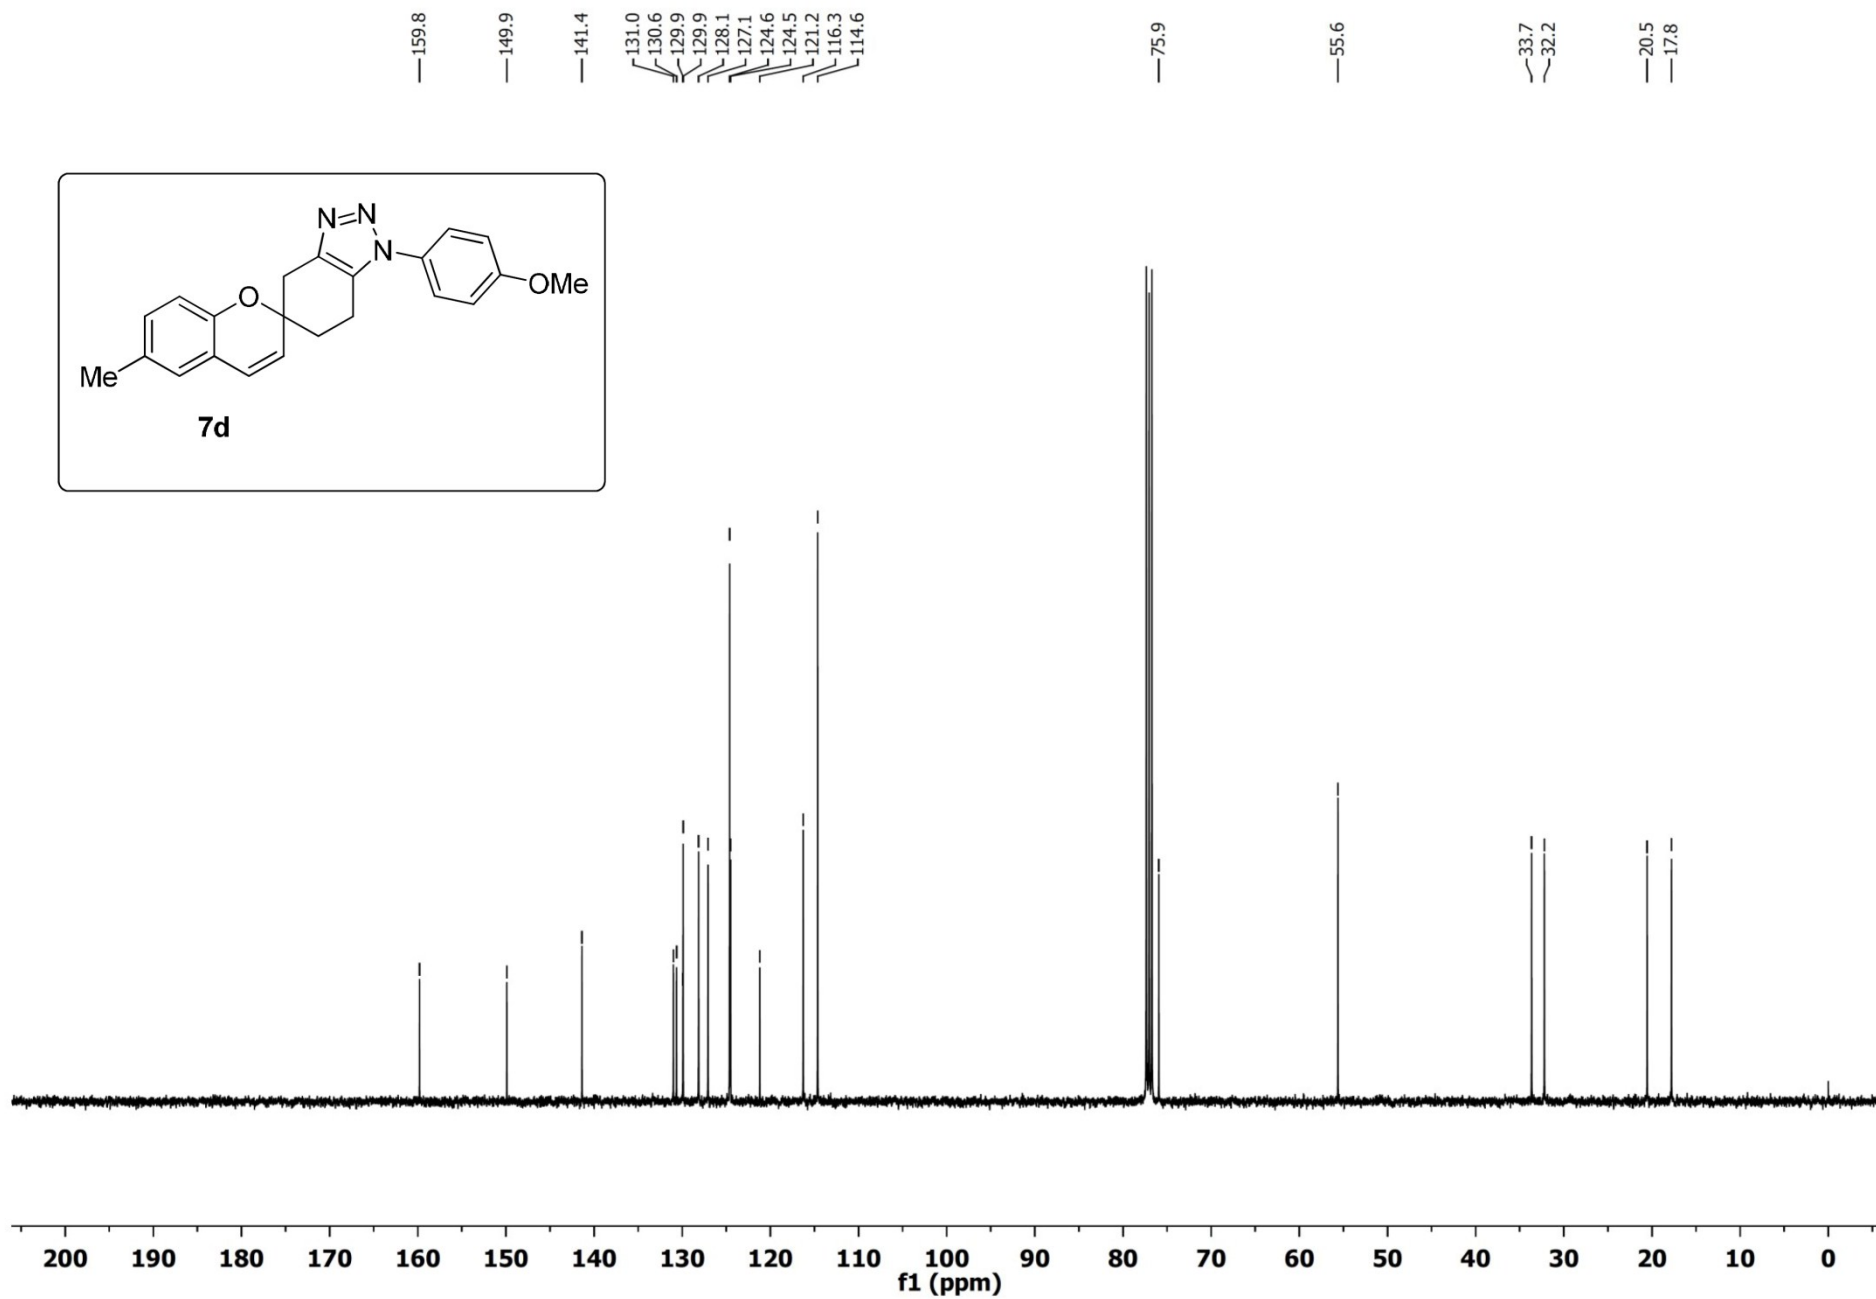

# MASS REPORT

Sample Name : PSH-3-359  
Data File : 141217.21.lcd  
Date Acquired : 12/14/2017 1:40:16 PM  
Batch File : 14-12-17.lcb

MS Spectrum  
D:\DATA\DEC-17\141217.21.lcd

Averaged ESI Positive+  
Spectrum Mode: Averaged 0.223-0.438(108-211)

[CPS]

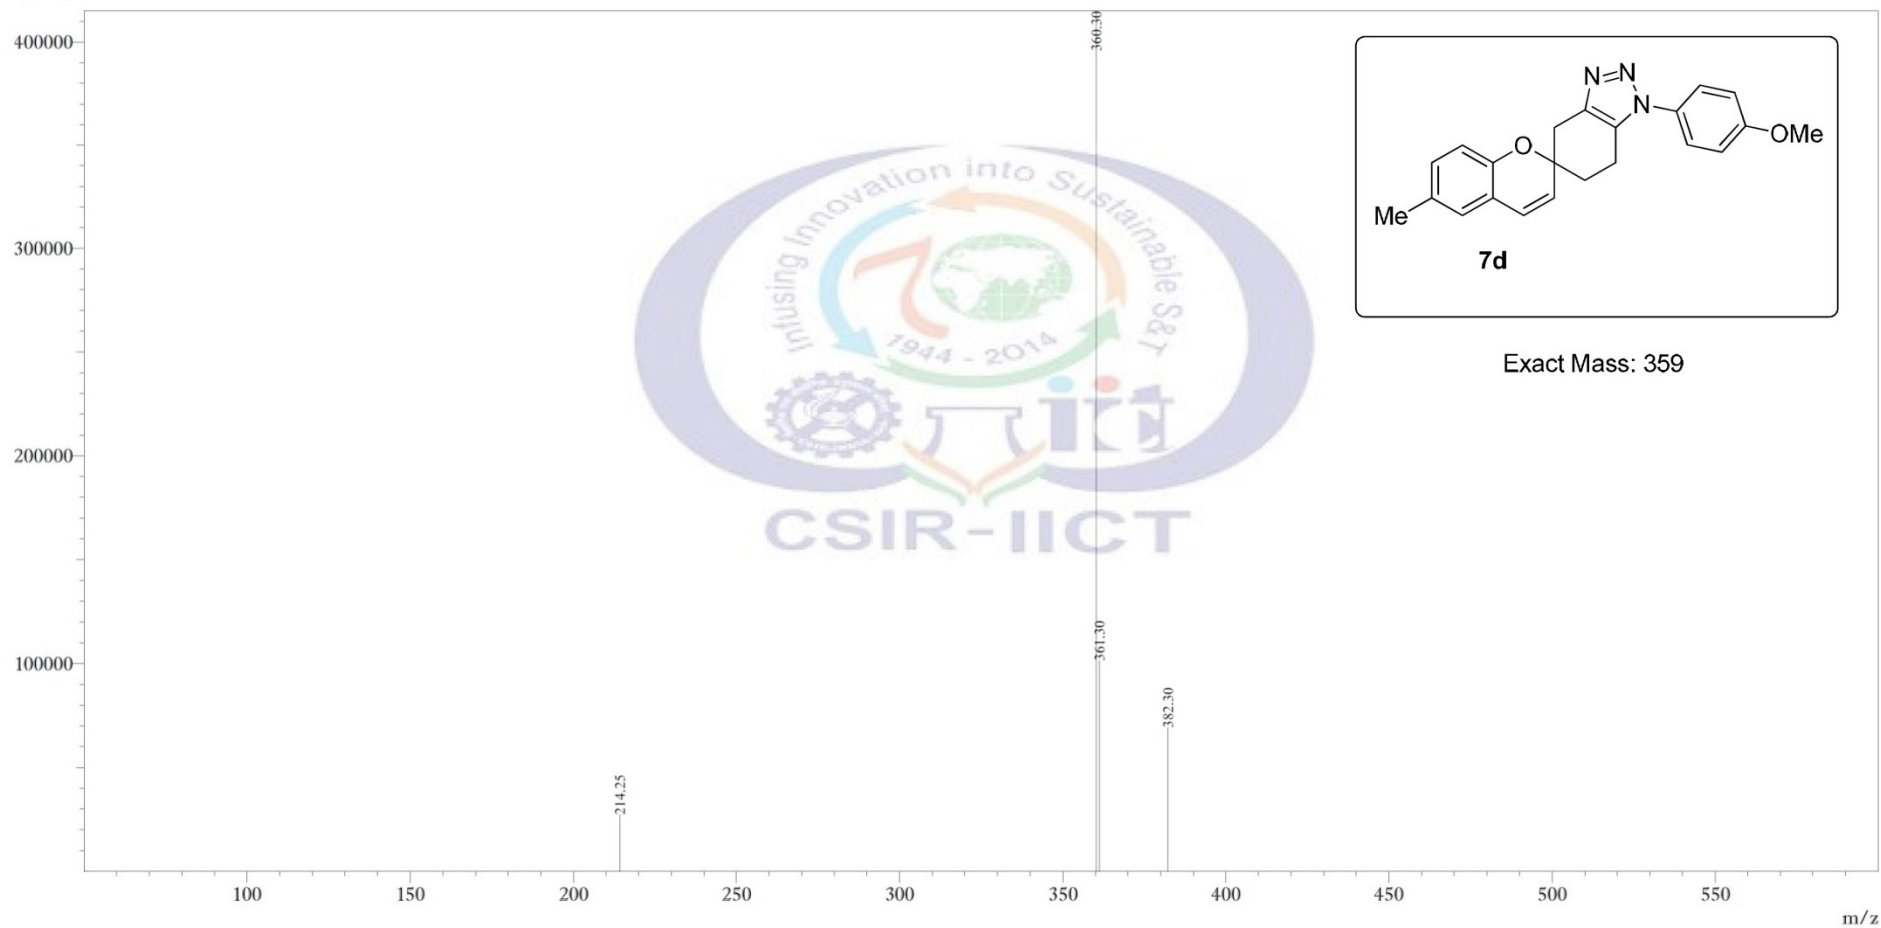

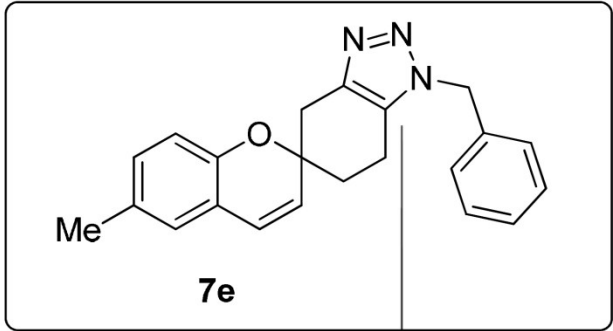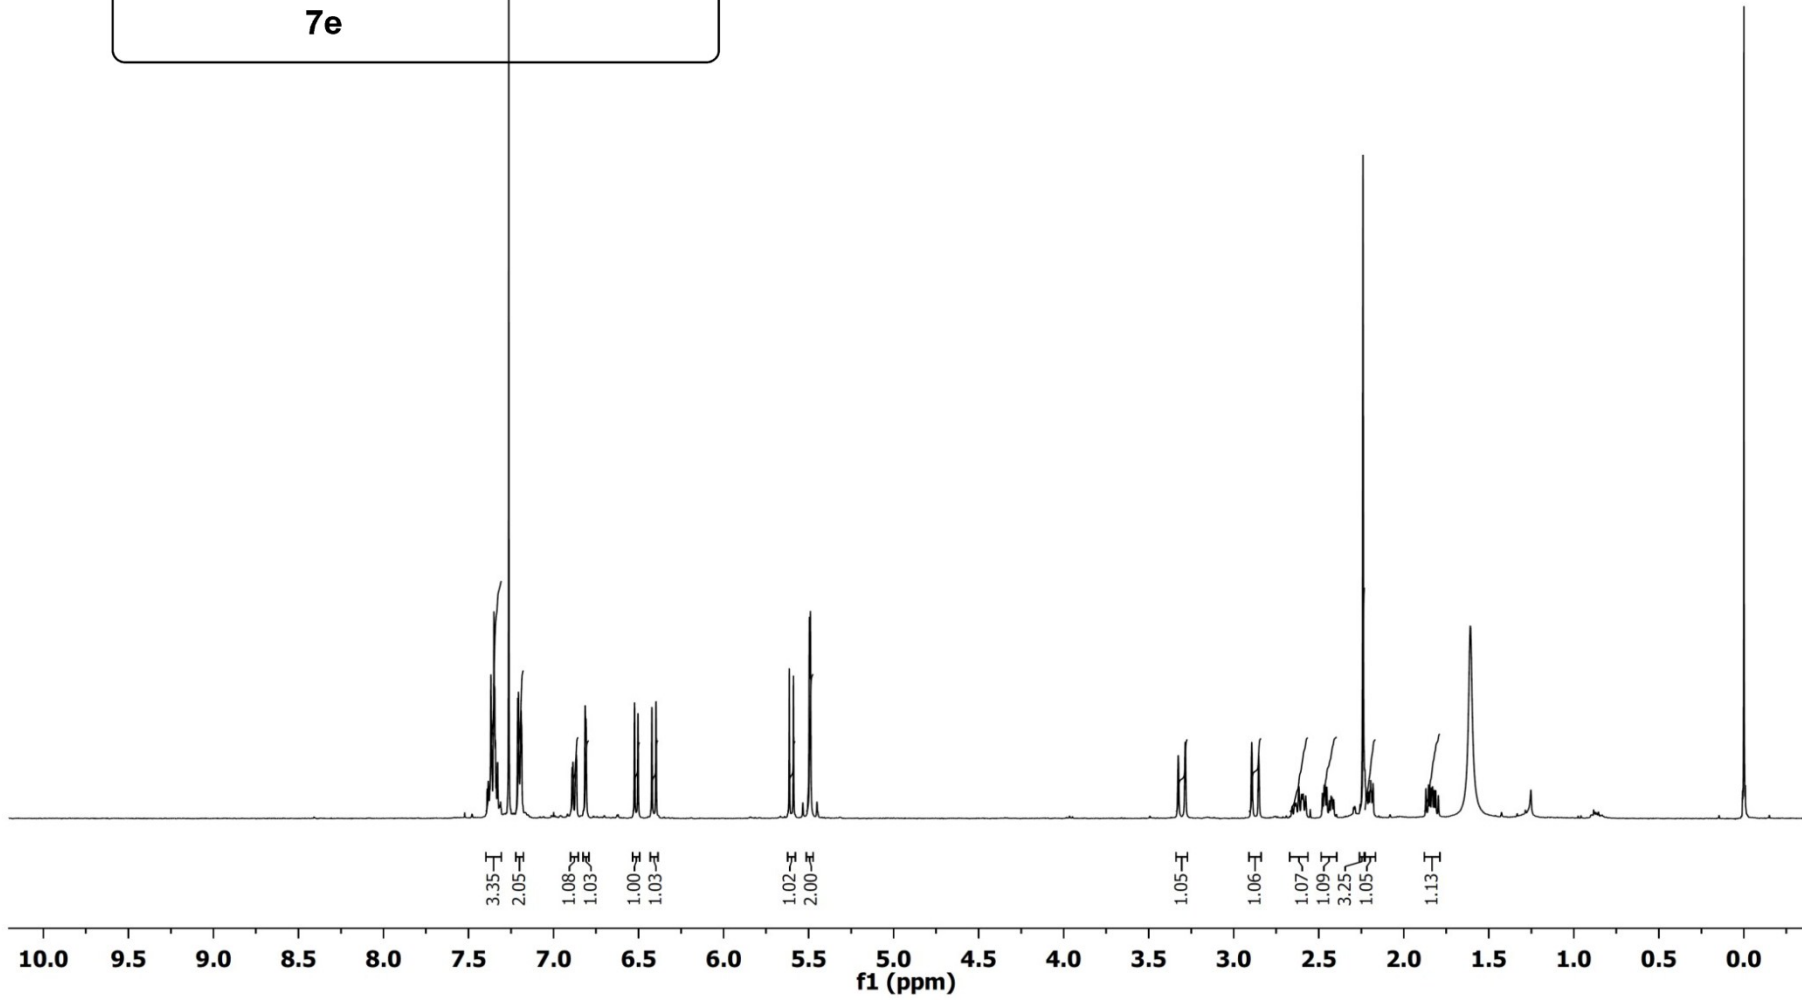



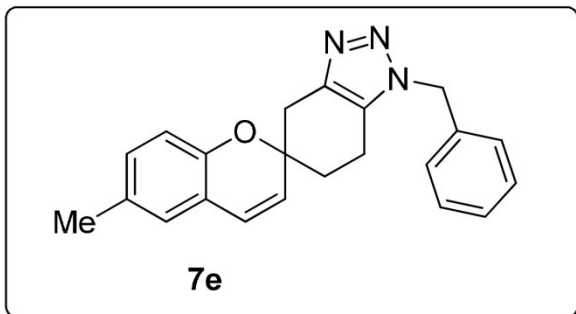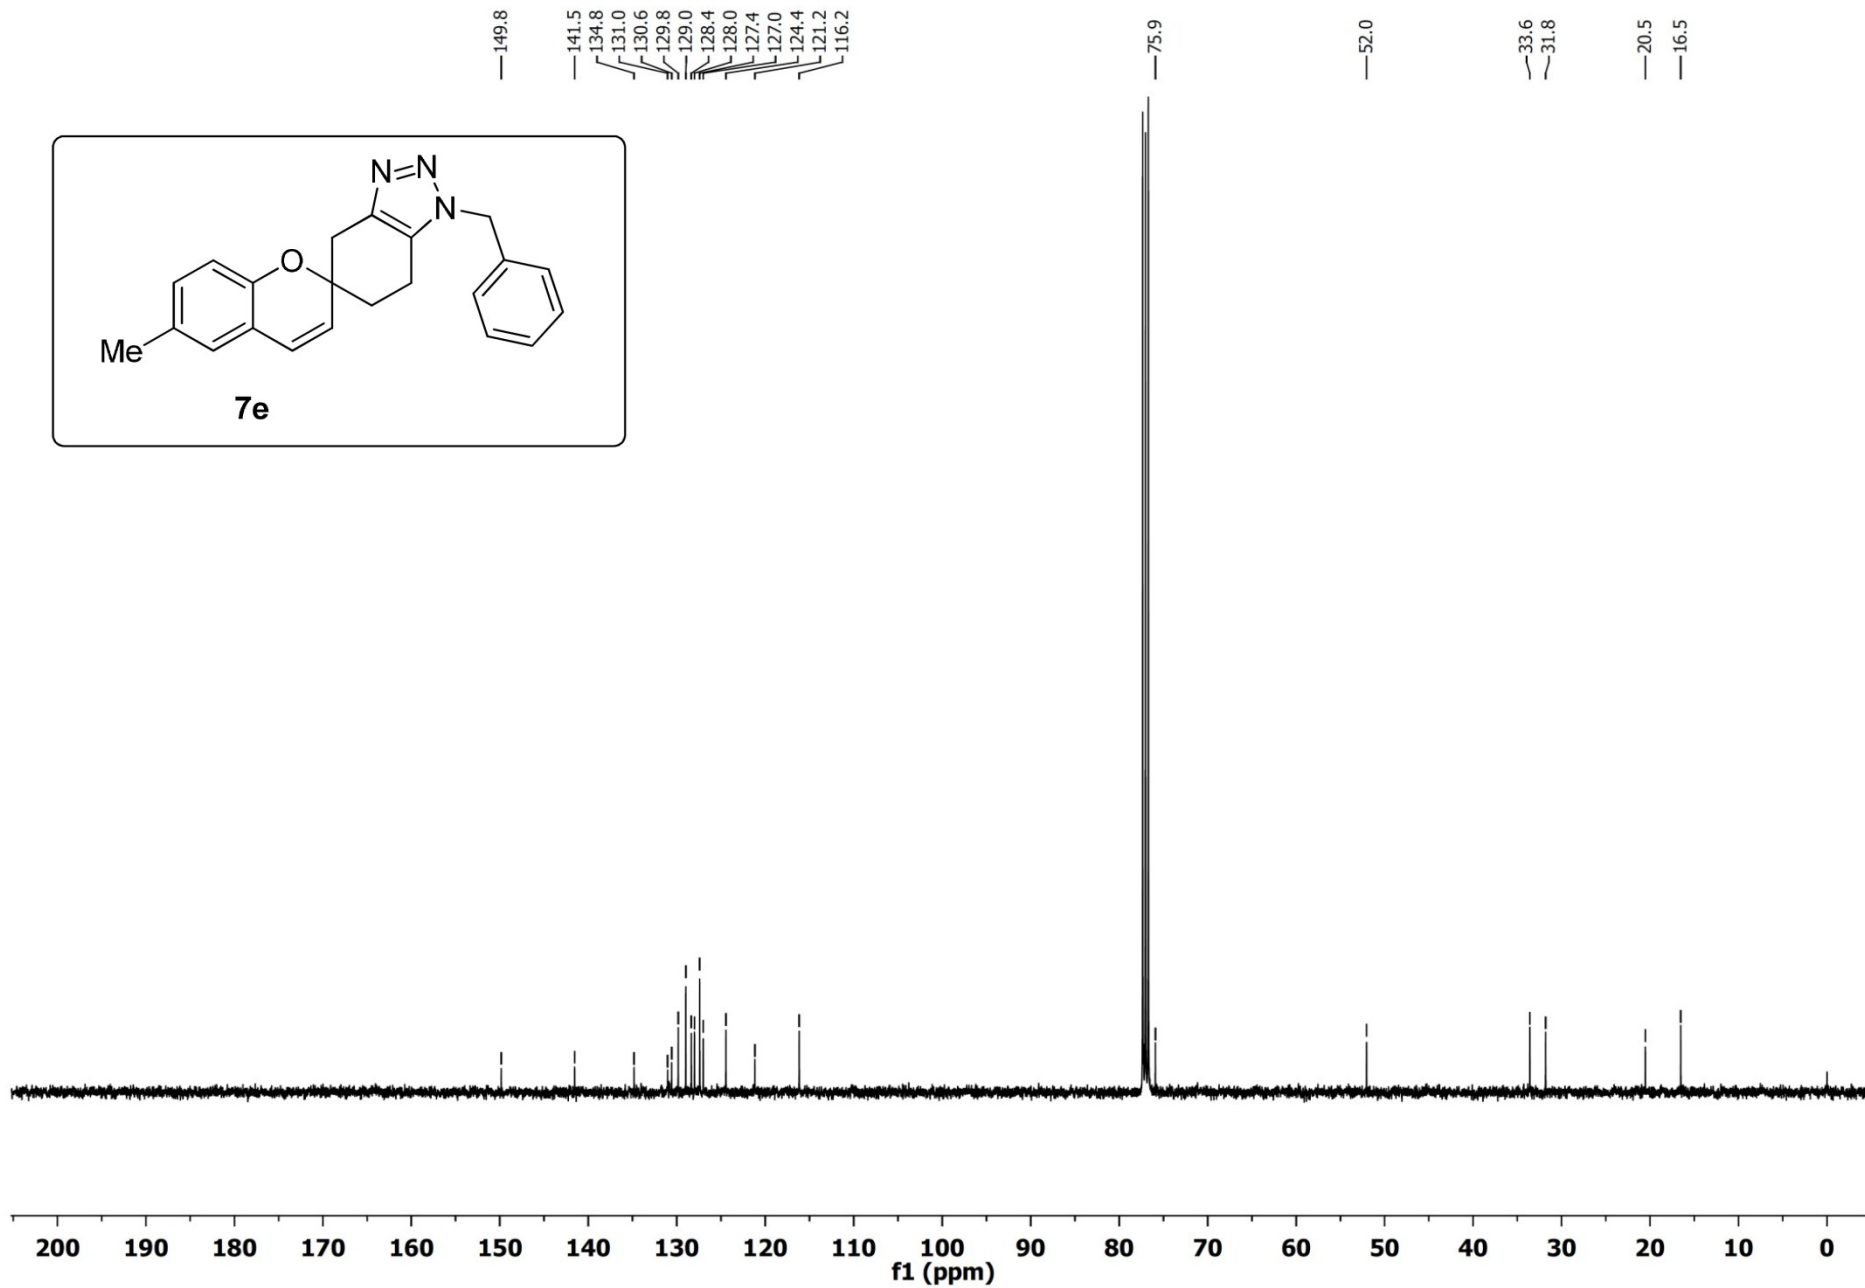

# MASS REPORT

Sample Name : PSH-2-343  
Data File : 141217.31.lcd  
Date Acquired : 12/14/2017 1:56:33 PM  
Batch File : 14-12-17.lcb

MS Spectrum  
D:\DATA\DEC-17\141217.31.lcd

Averaged ESI Positive+  
Spectrum Mode: Averaged 0.235-0.500(114-241)

[CPS]

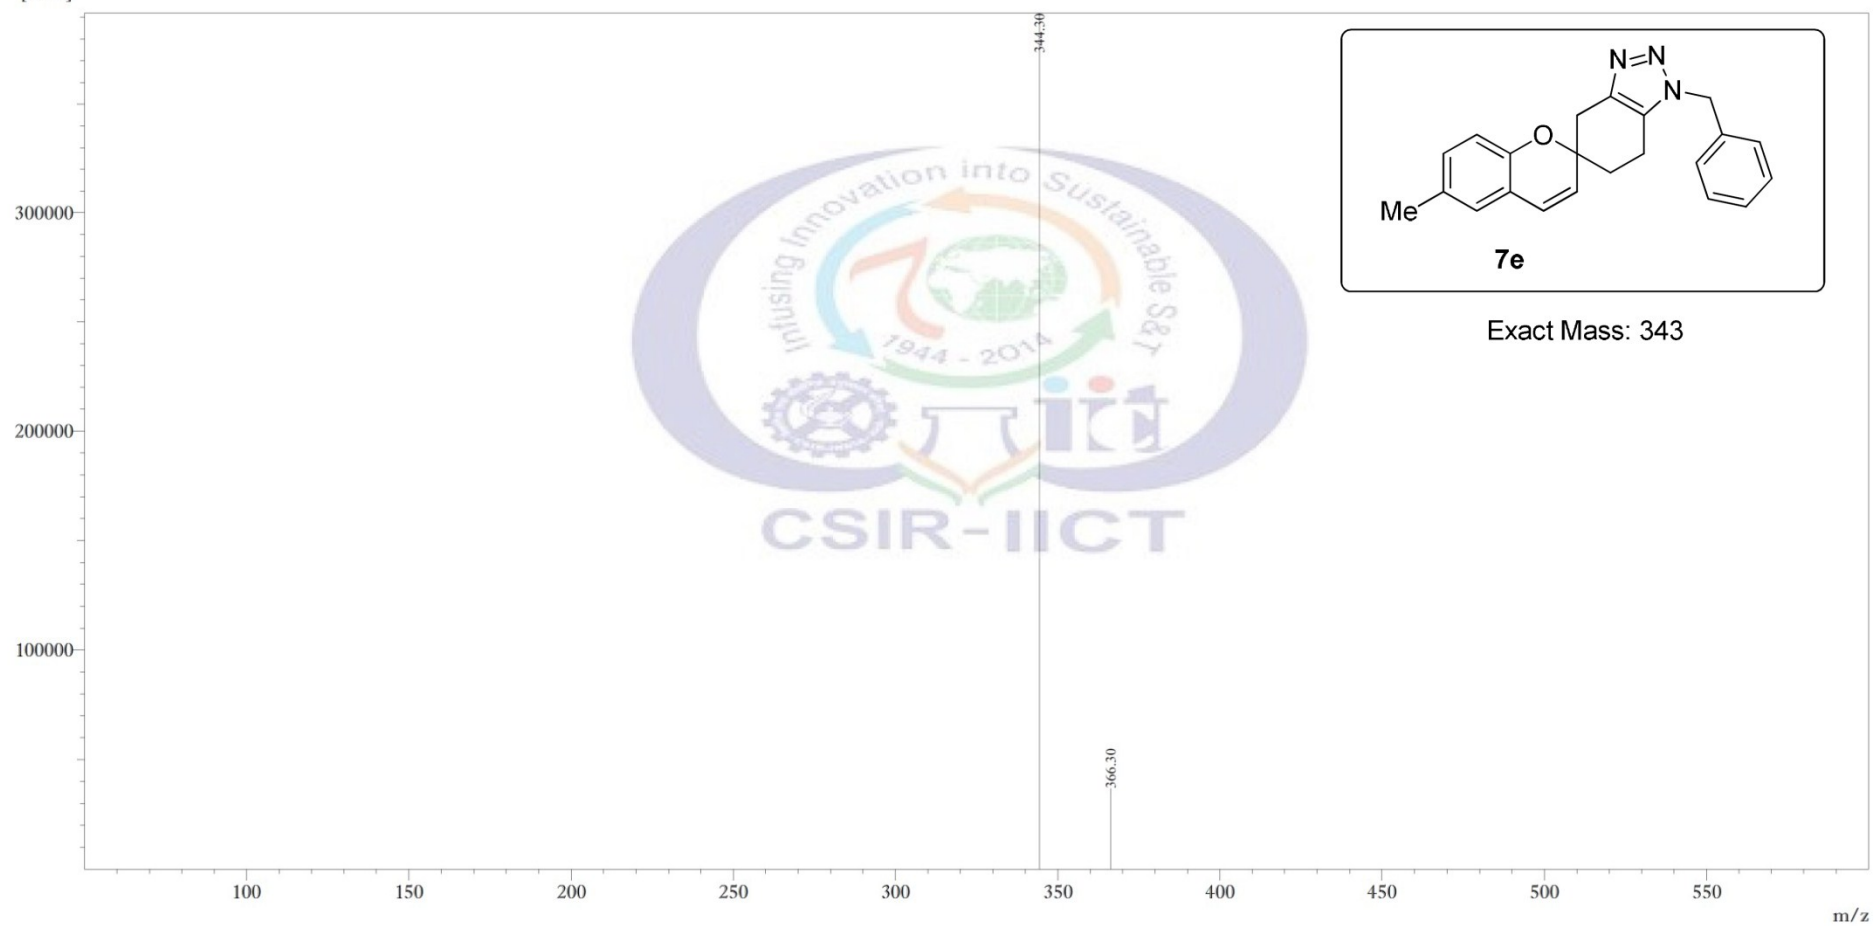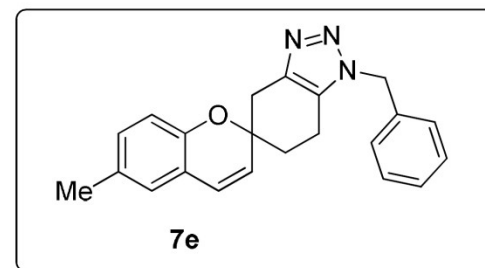

Exact Mass: 343

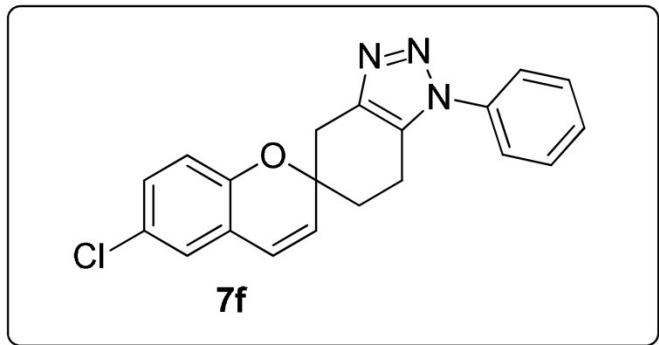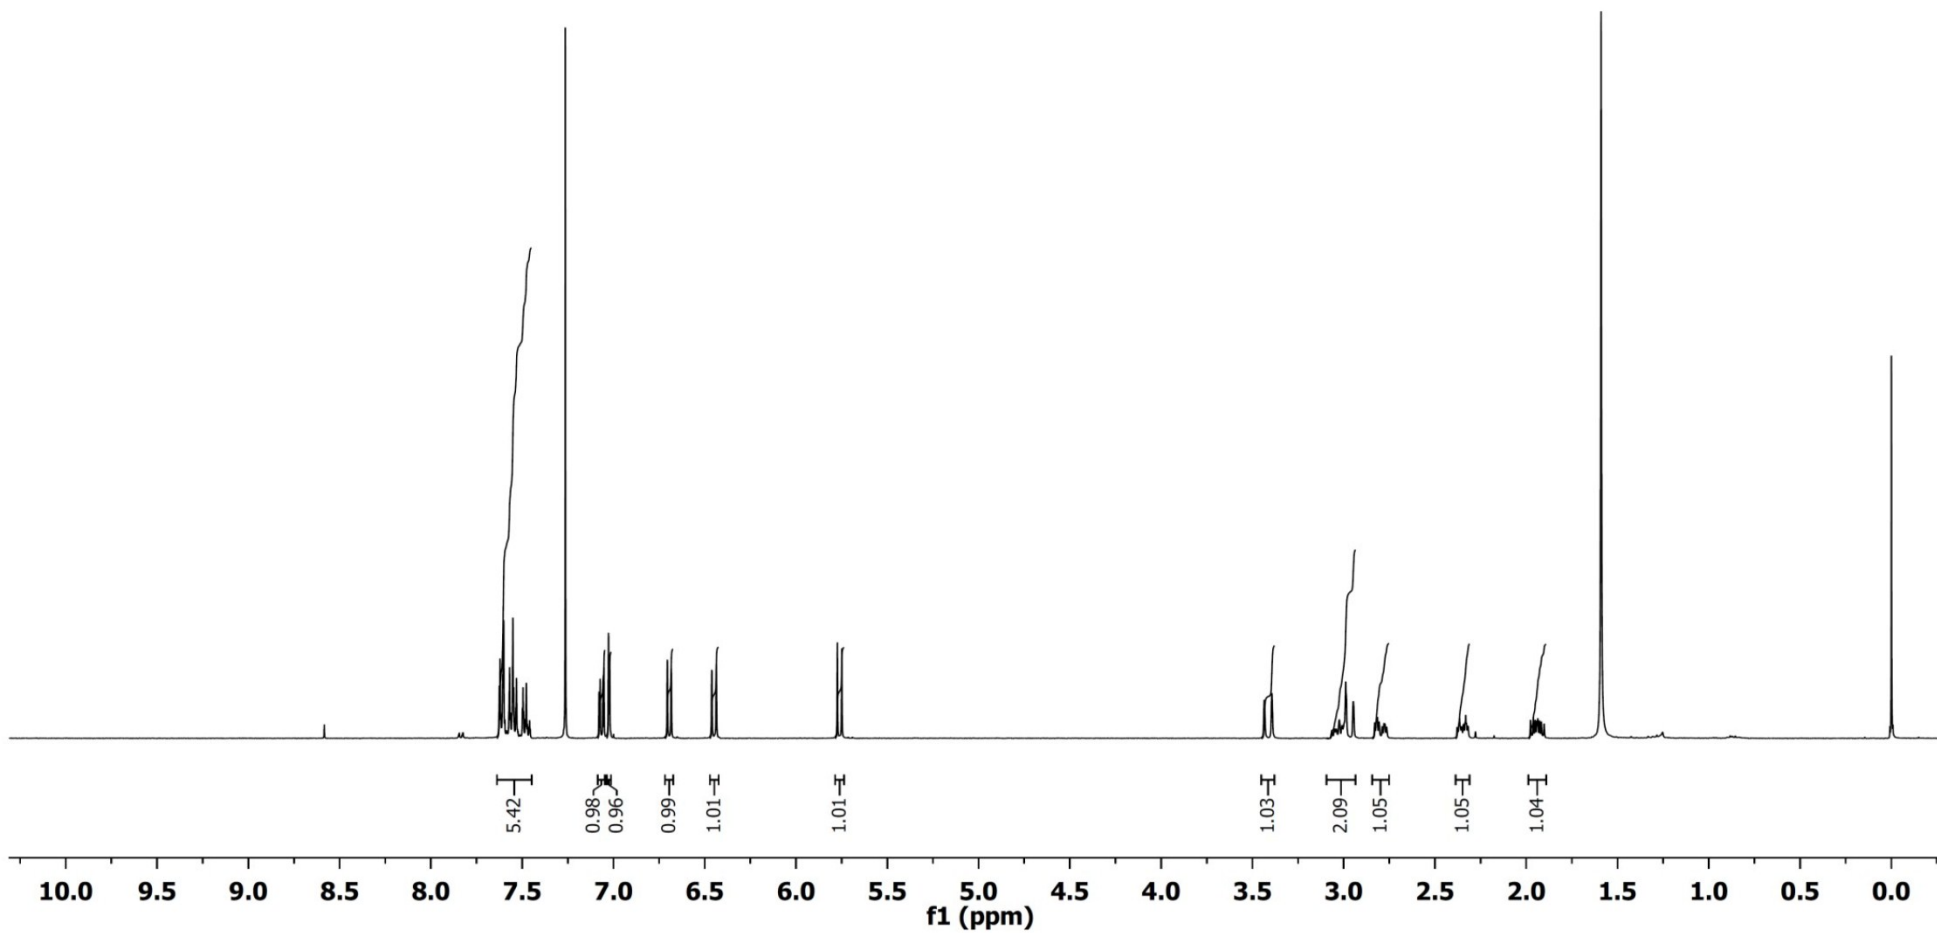

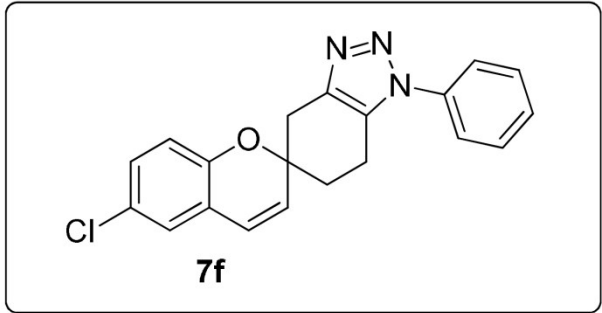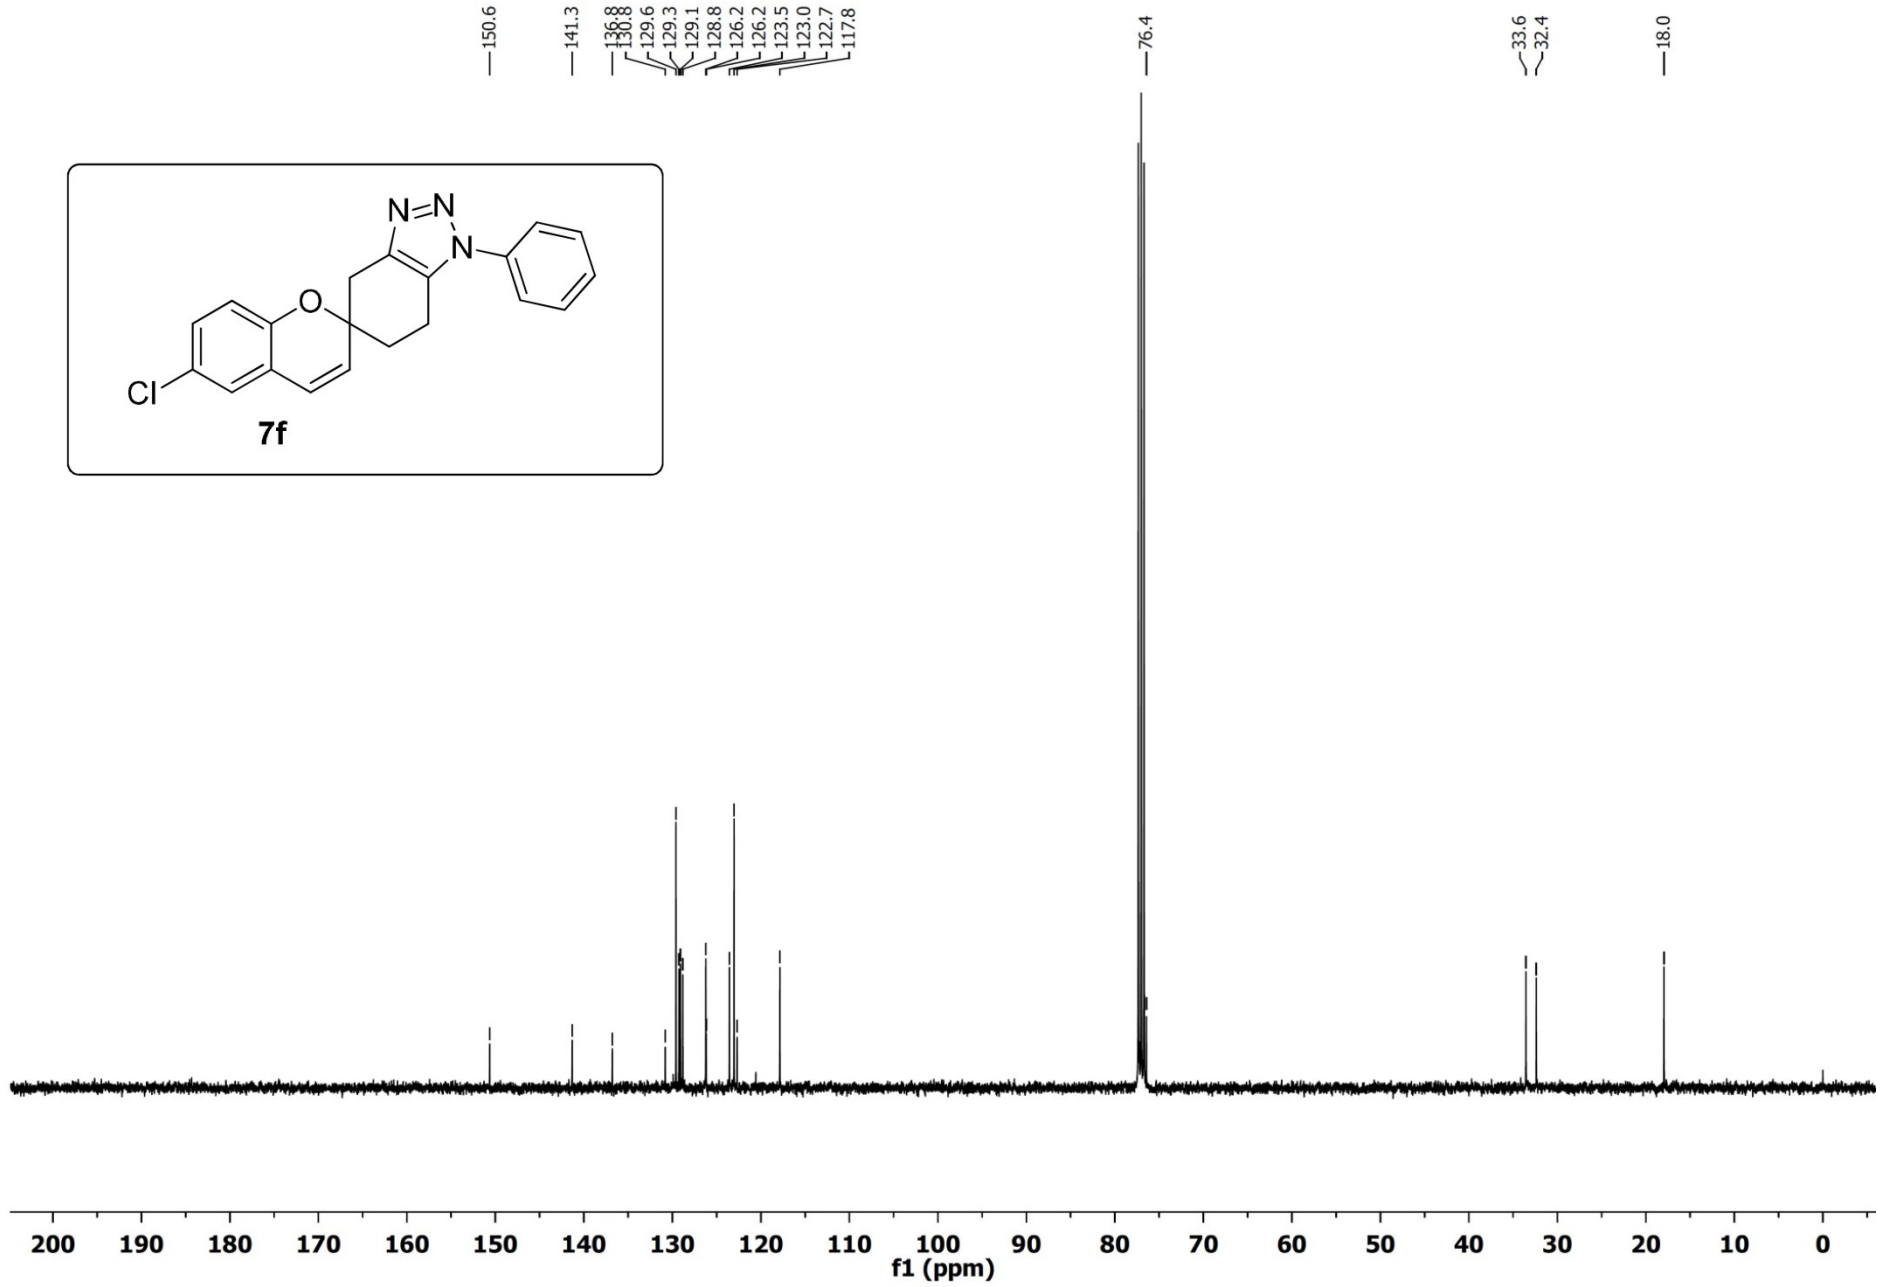

# ==== Organic and Biomolecular Chemistry Division, IICT ====

## Sample Information

Date Acquired : 11/14/2017 2:53:13 PM  
Sample Name : NSK  
Sample ID : SG-7  
Data File : 13-21-349-SG-7-F.lcd  
Method File : FCL-+@-.lcm

ESI-MS Spectrum  
NSK 13-21-349-SG-7-F.lcd

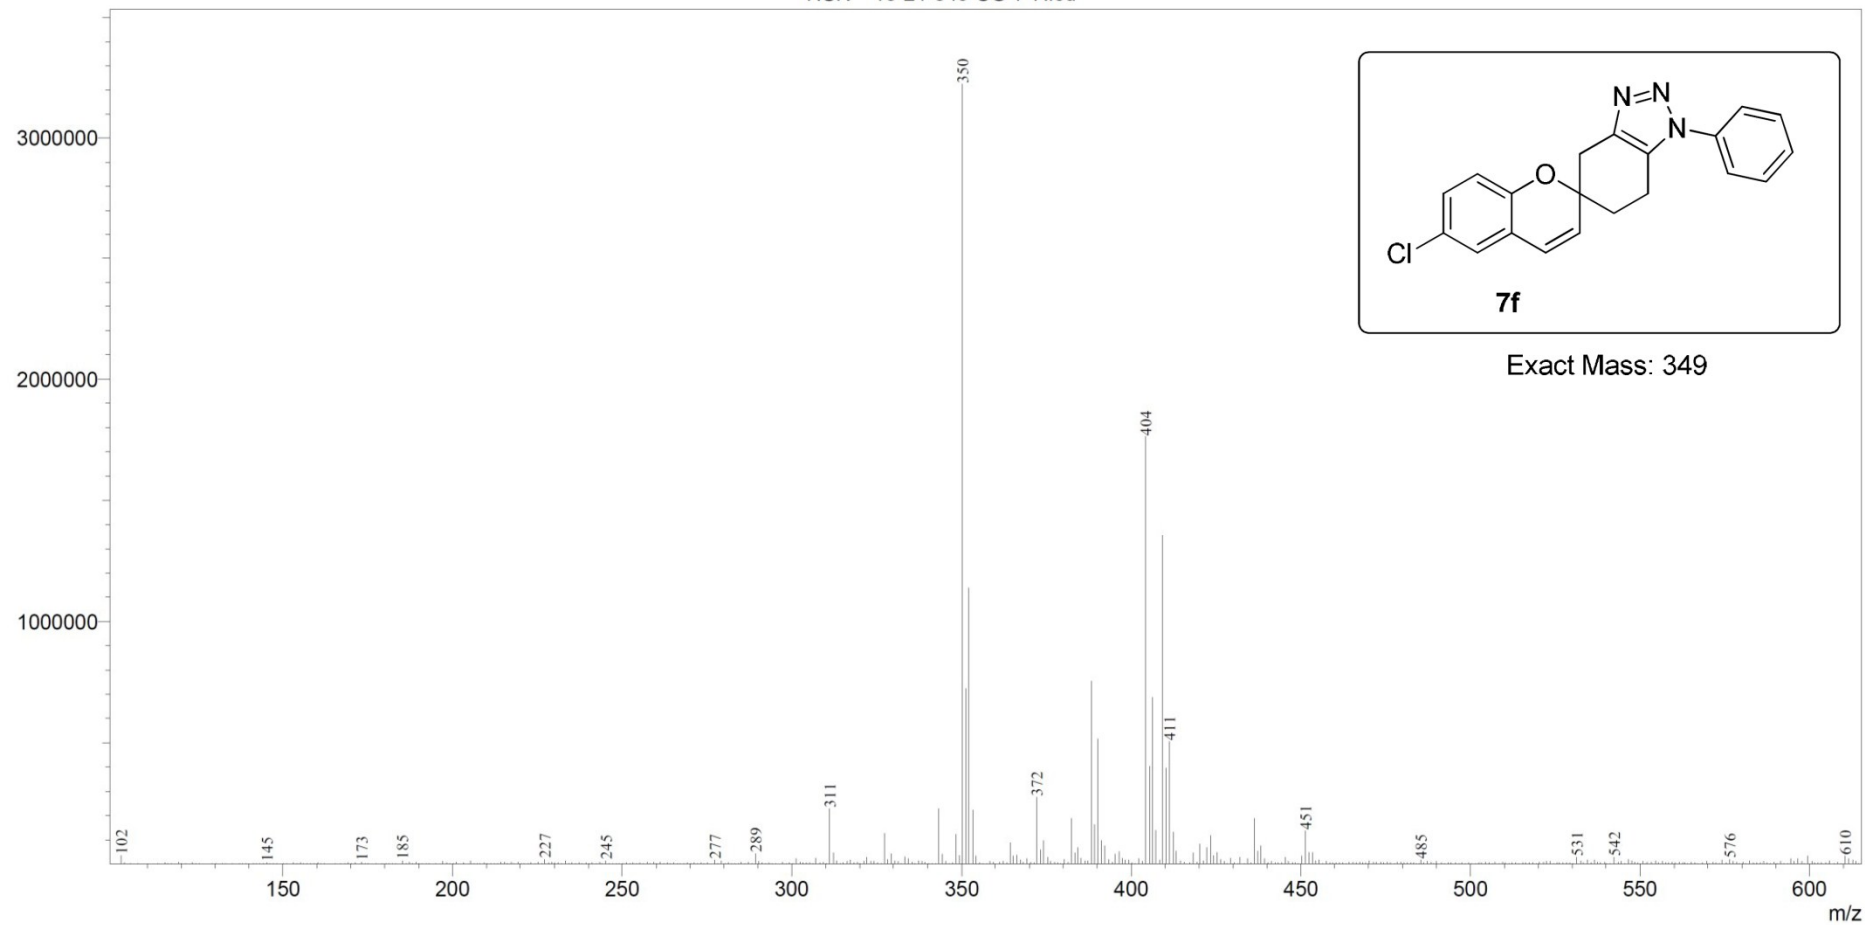

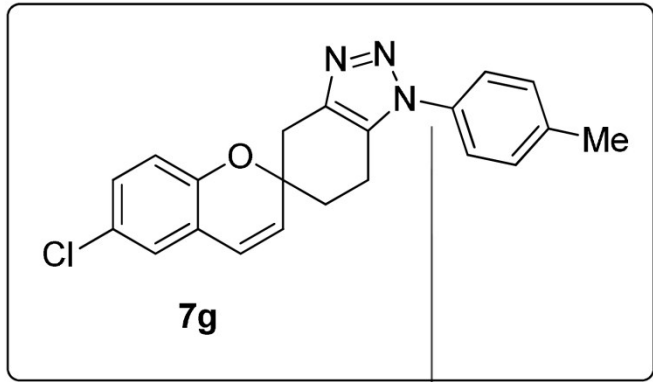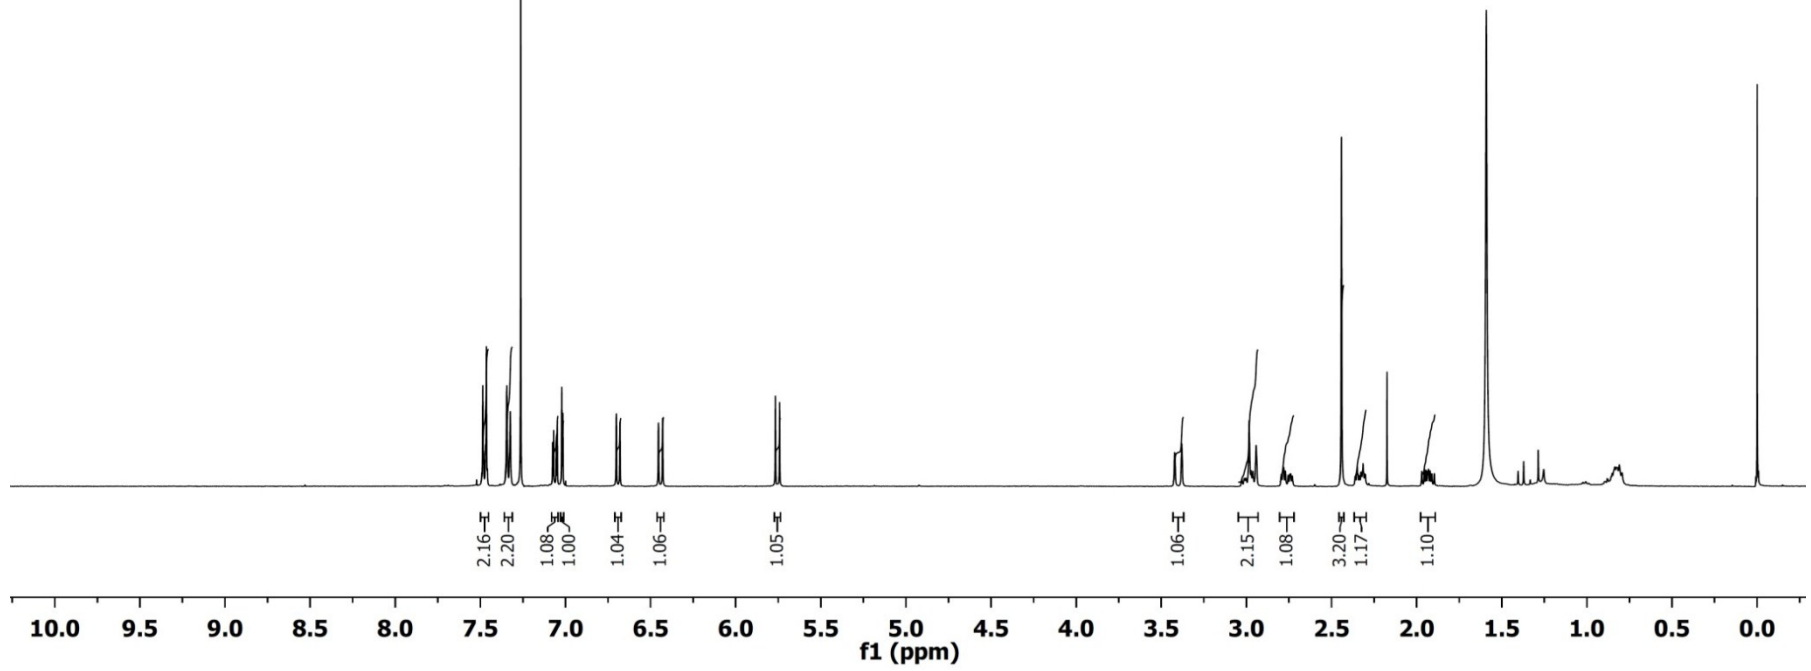

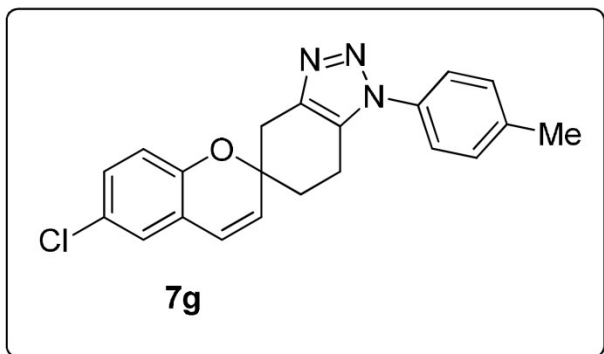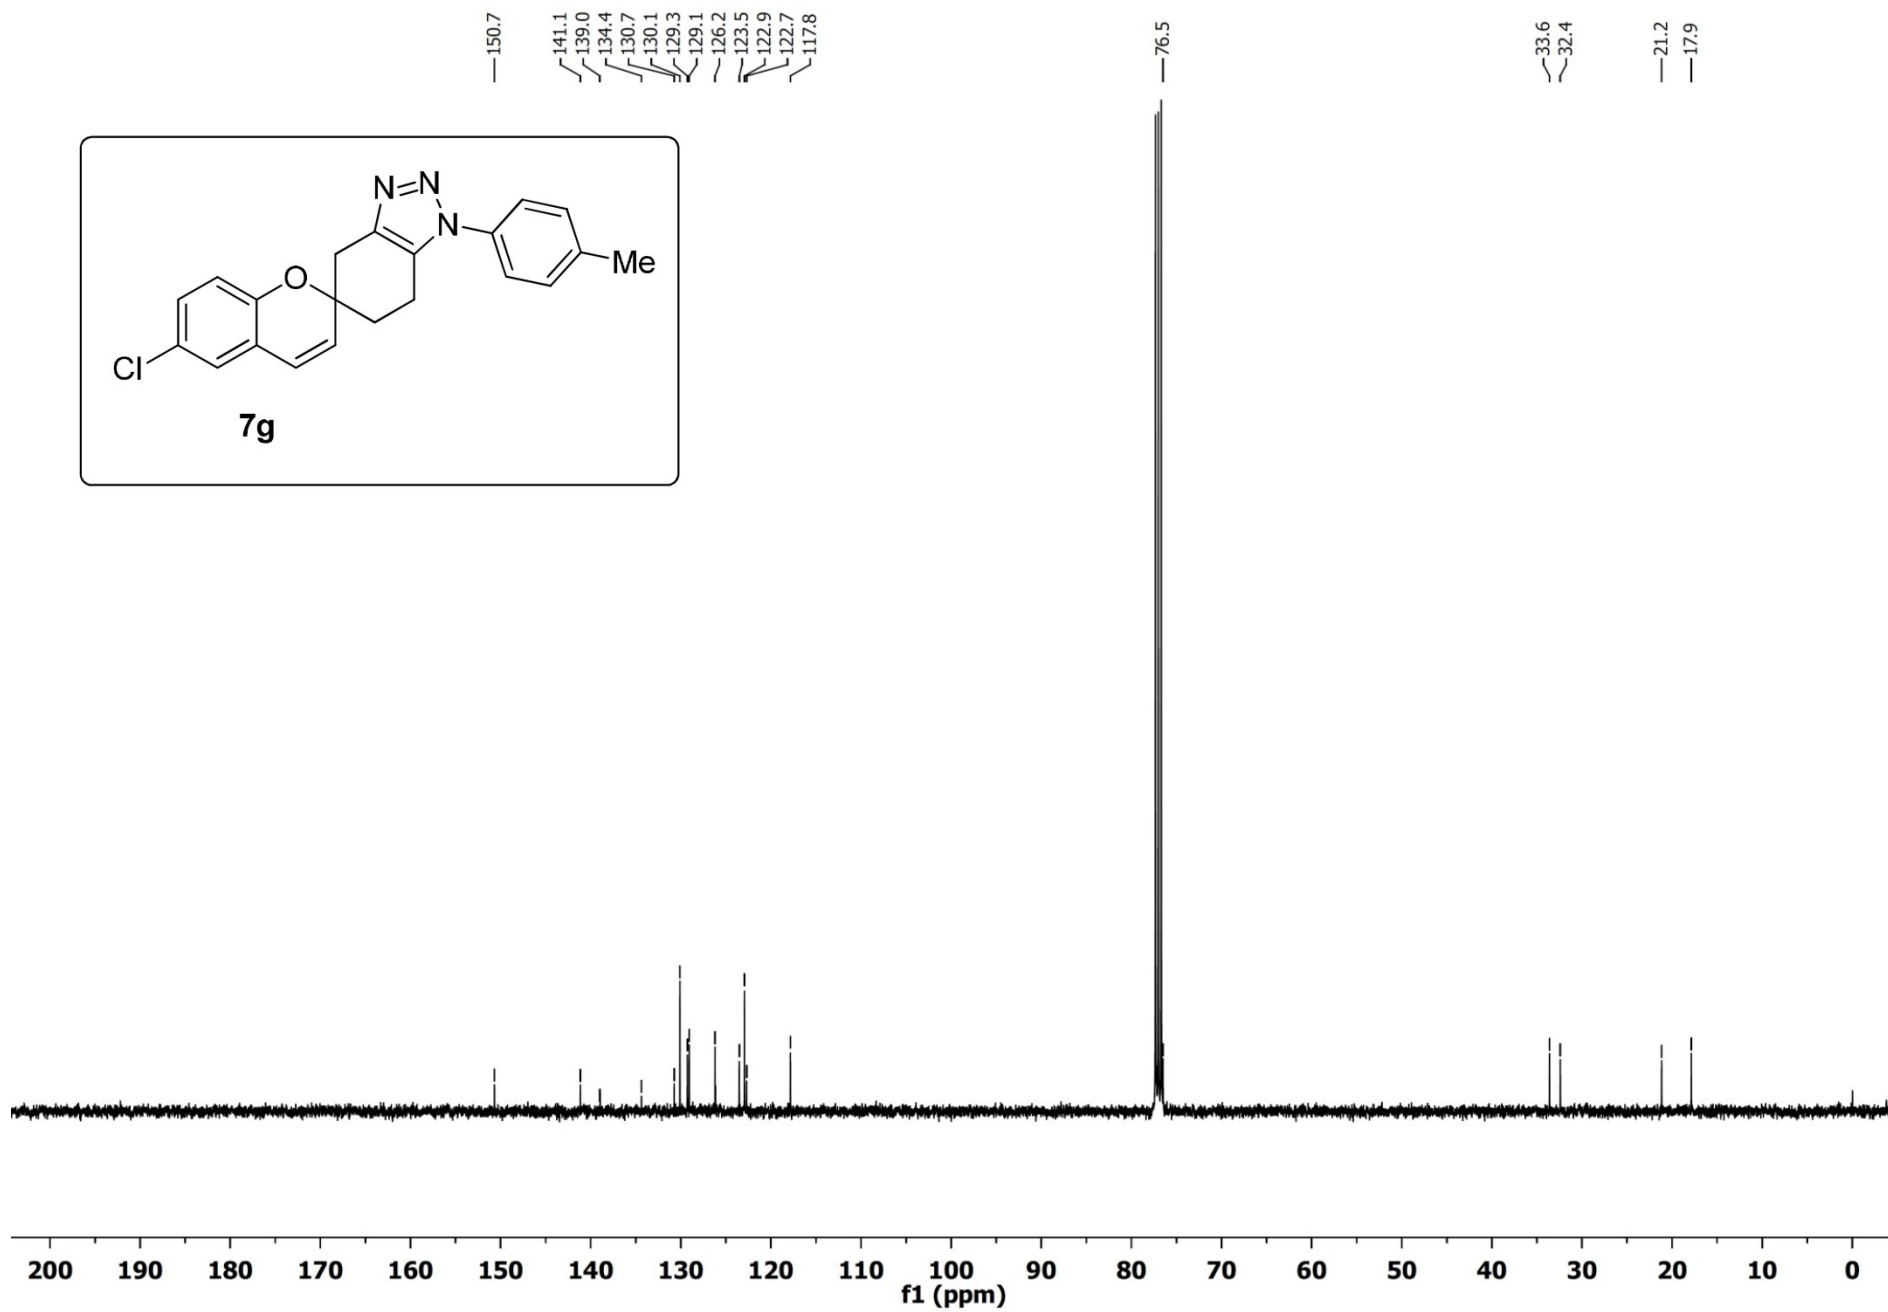

# ==== Organic and Biomolecular Chemistry Division, IICT ====

Date Acquired : 11/14/2017 2:39:08 PM  
Sample Name : NSK  
Sample ID : SG-7  
Data File : 13-16-363-SG-7-G.lcd  
Method File : FCL+@-lcm

Sample Information

ESI-MS Spectrum  
NSK 13-16-363-SG-7-G.lcd

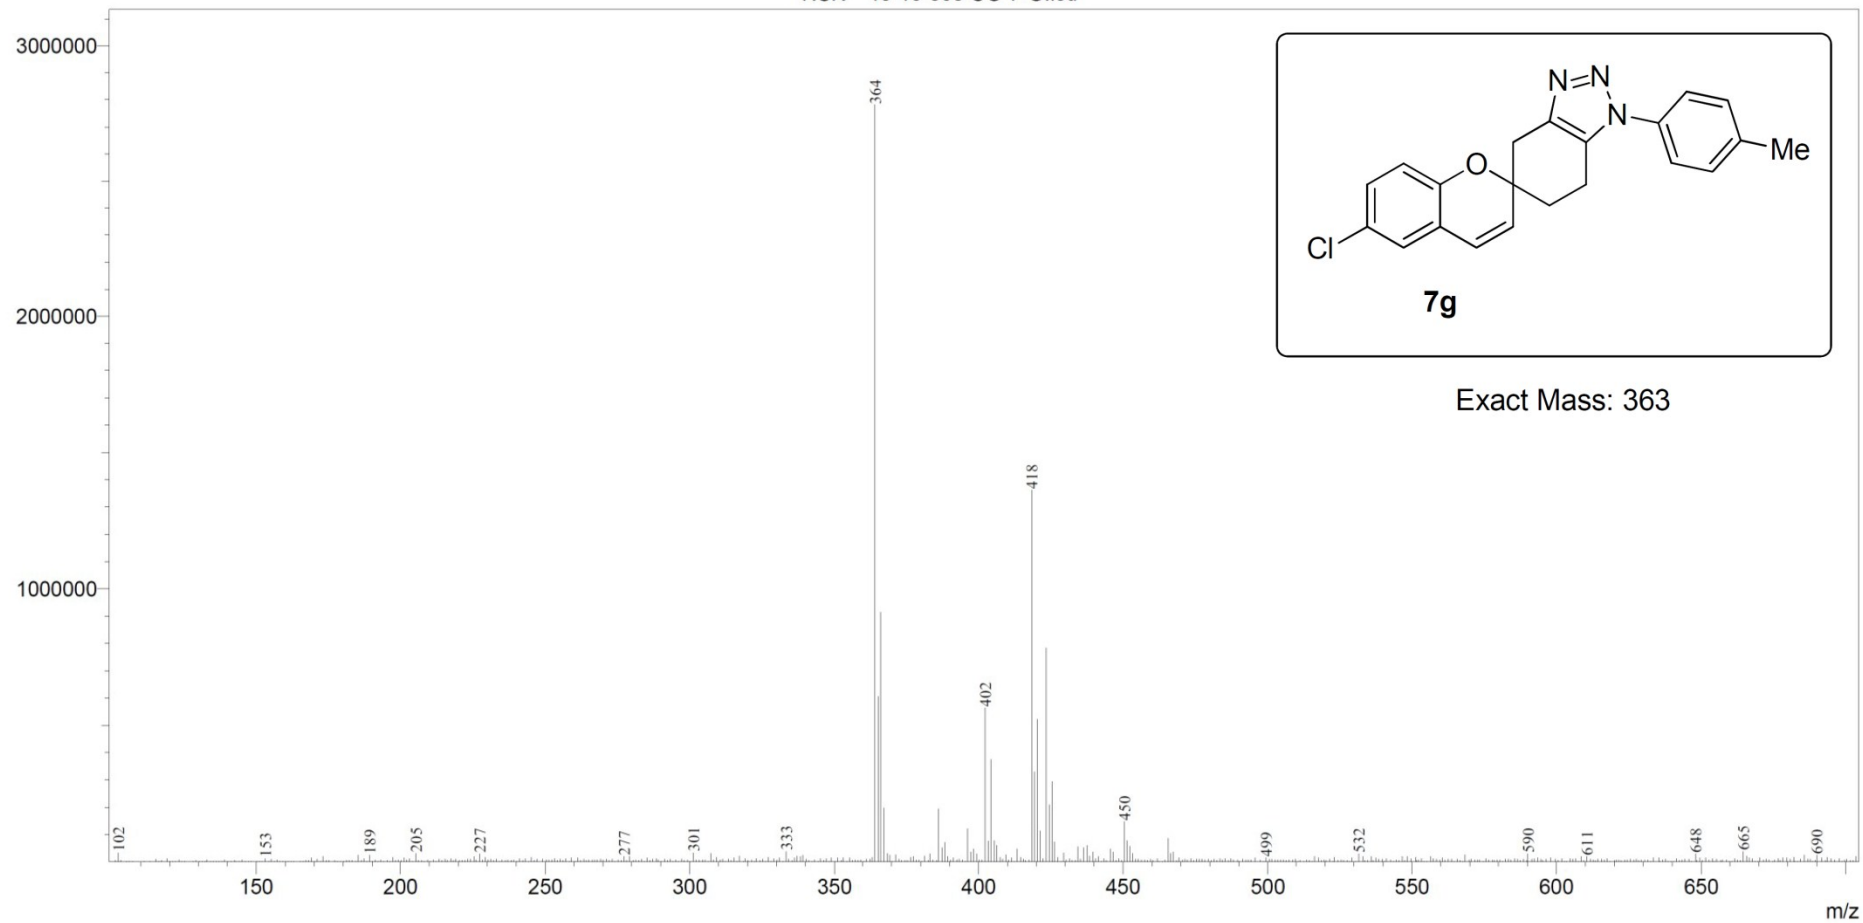



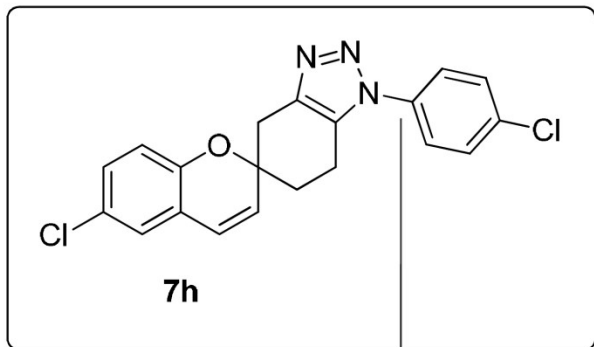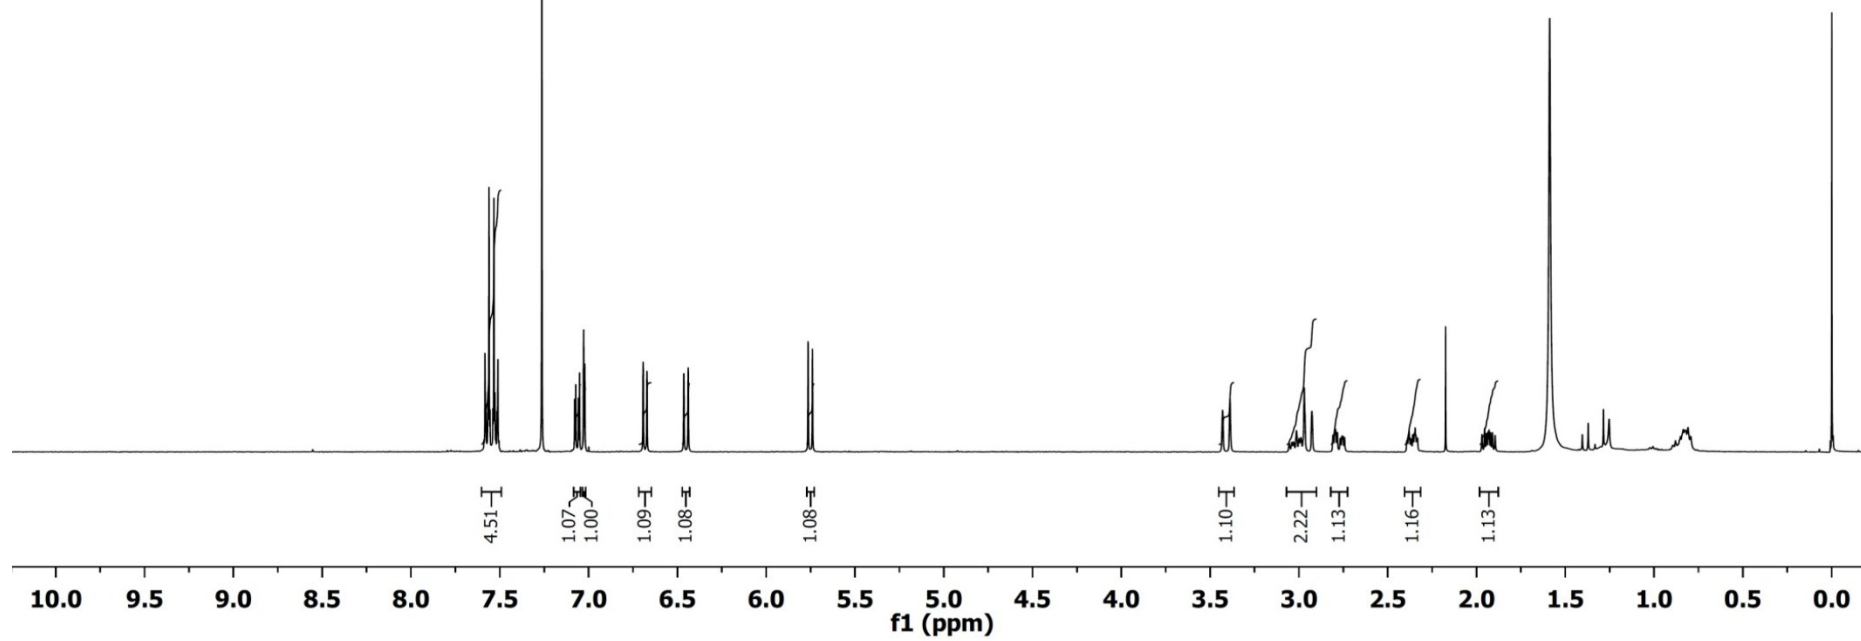

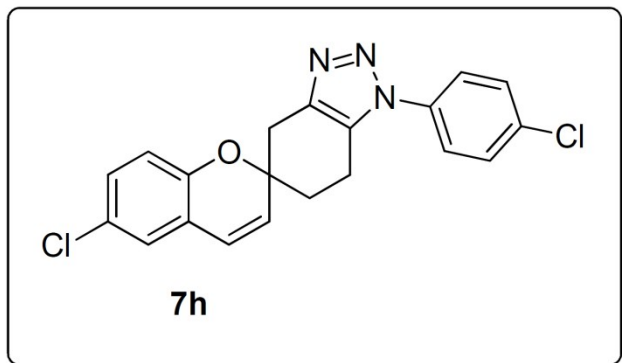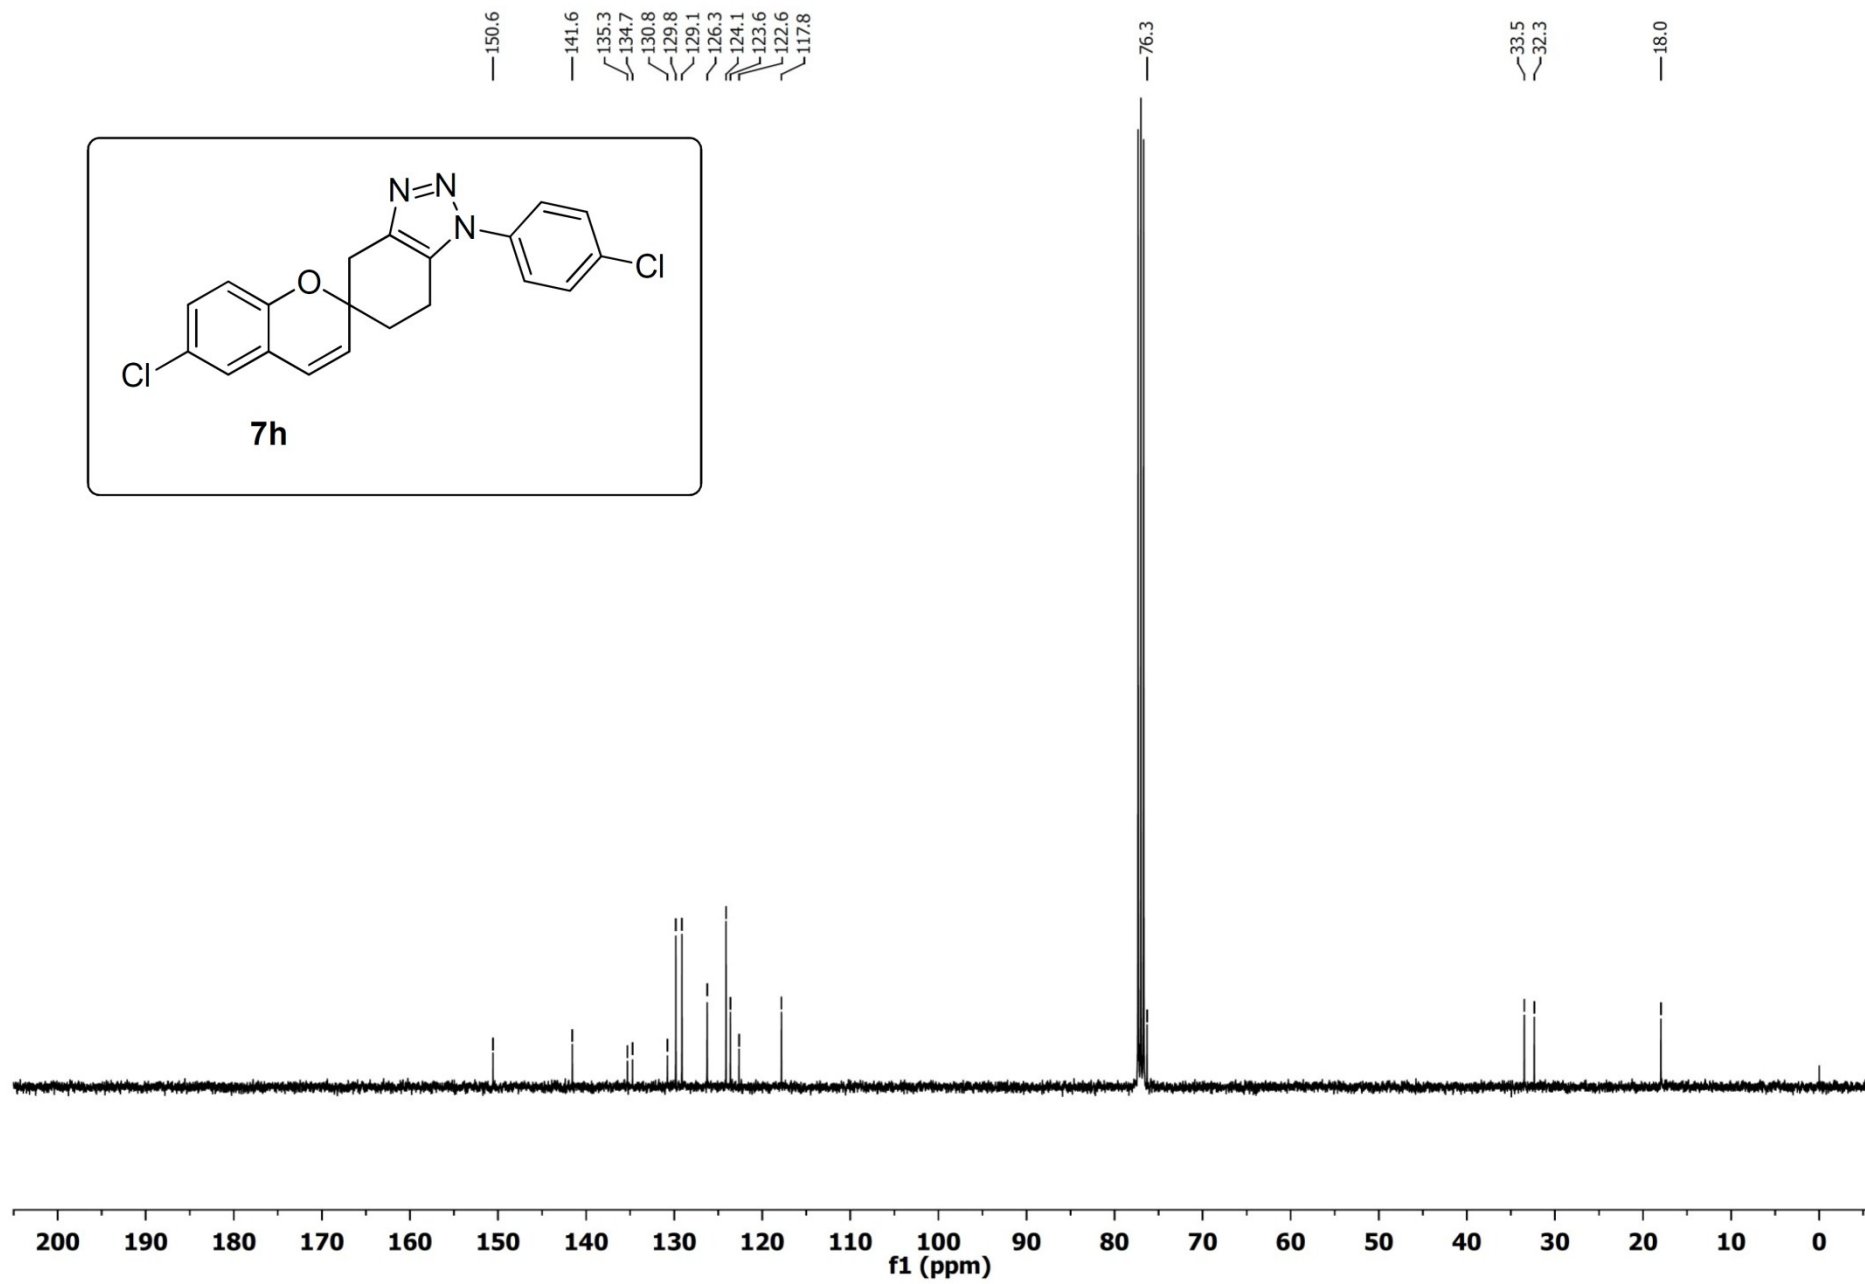

# ==== Organic and Biomolecular Chemistry Division, IICT ====

Date Acquired : 11/14/2017 2:41:57 PM  
Sample Name : NSK  
Sample ID : SG-7  
Data File : 13-17-384-SG-7-H.lcd  
Method File : FCL-+@-.lcm

Sample Information

ESI-MS Spectrum  
NSK 13-17-384-SG-7-H.lcd

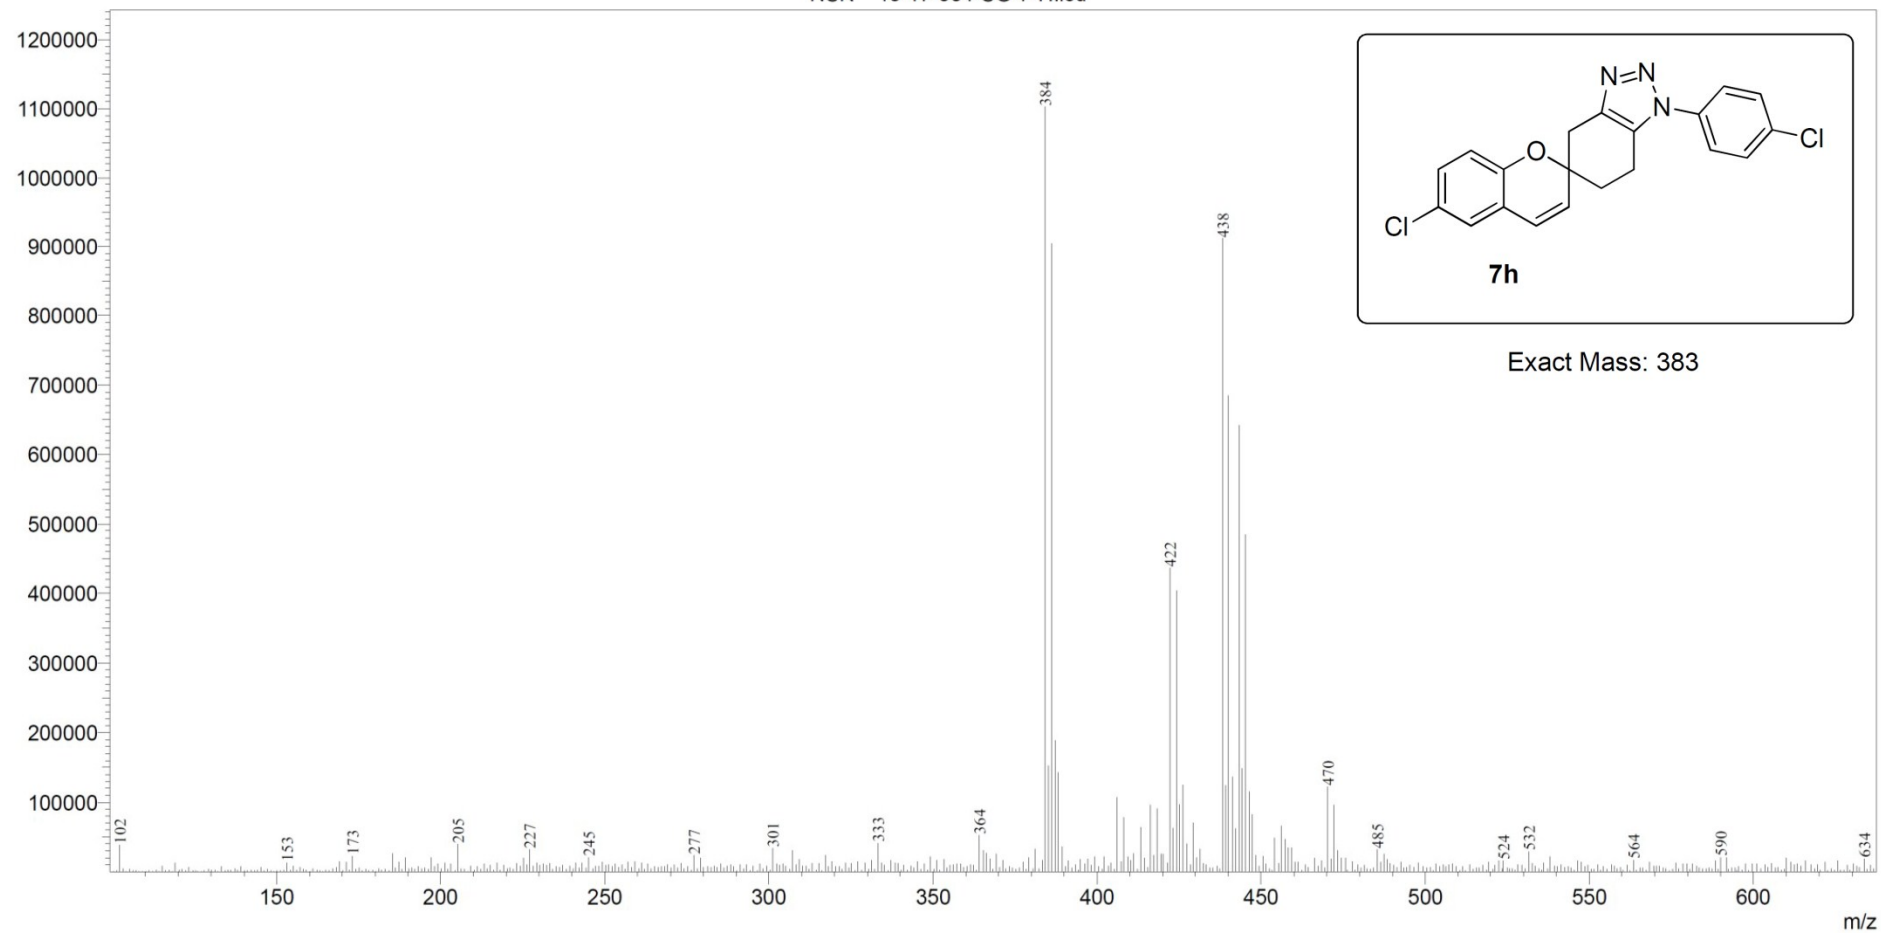

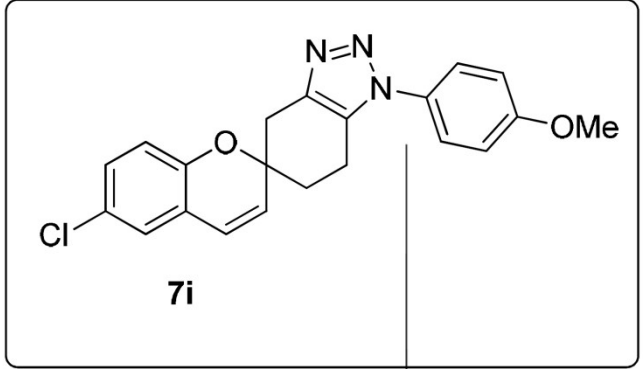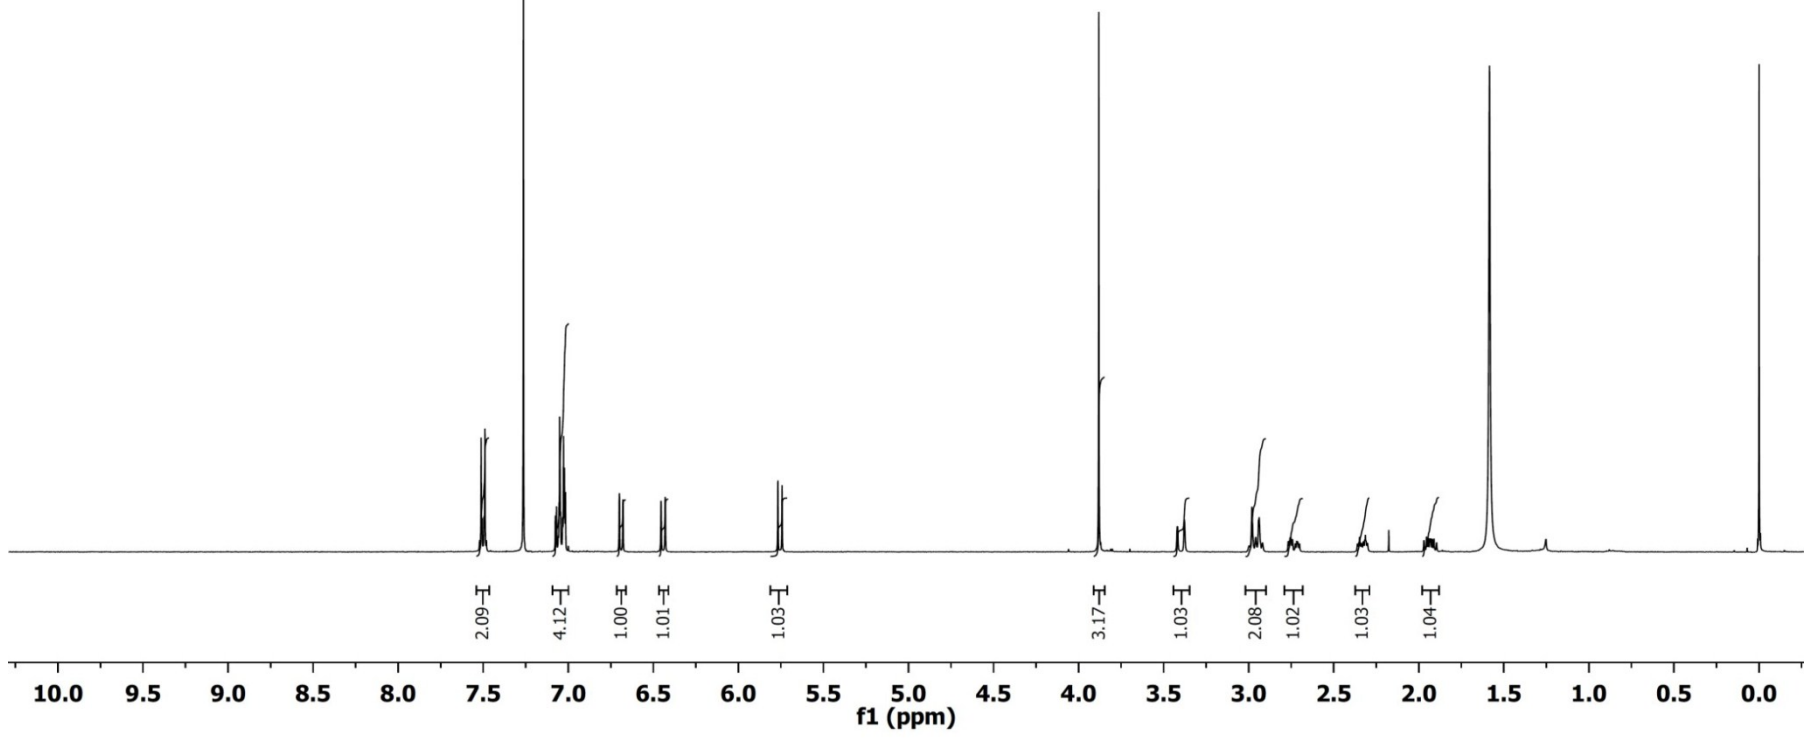

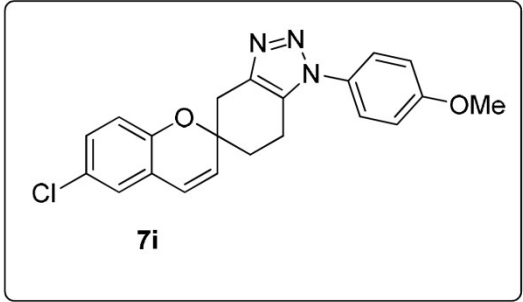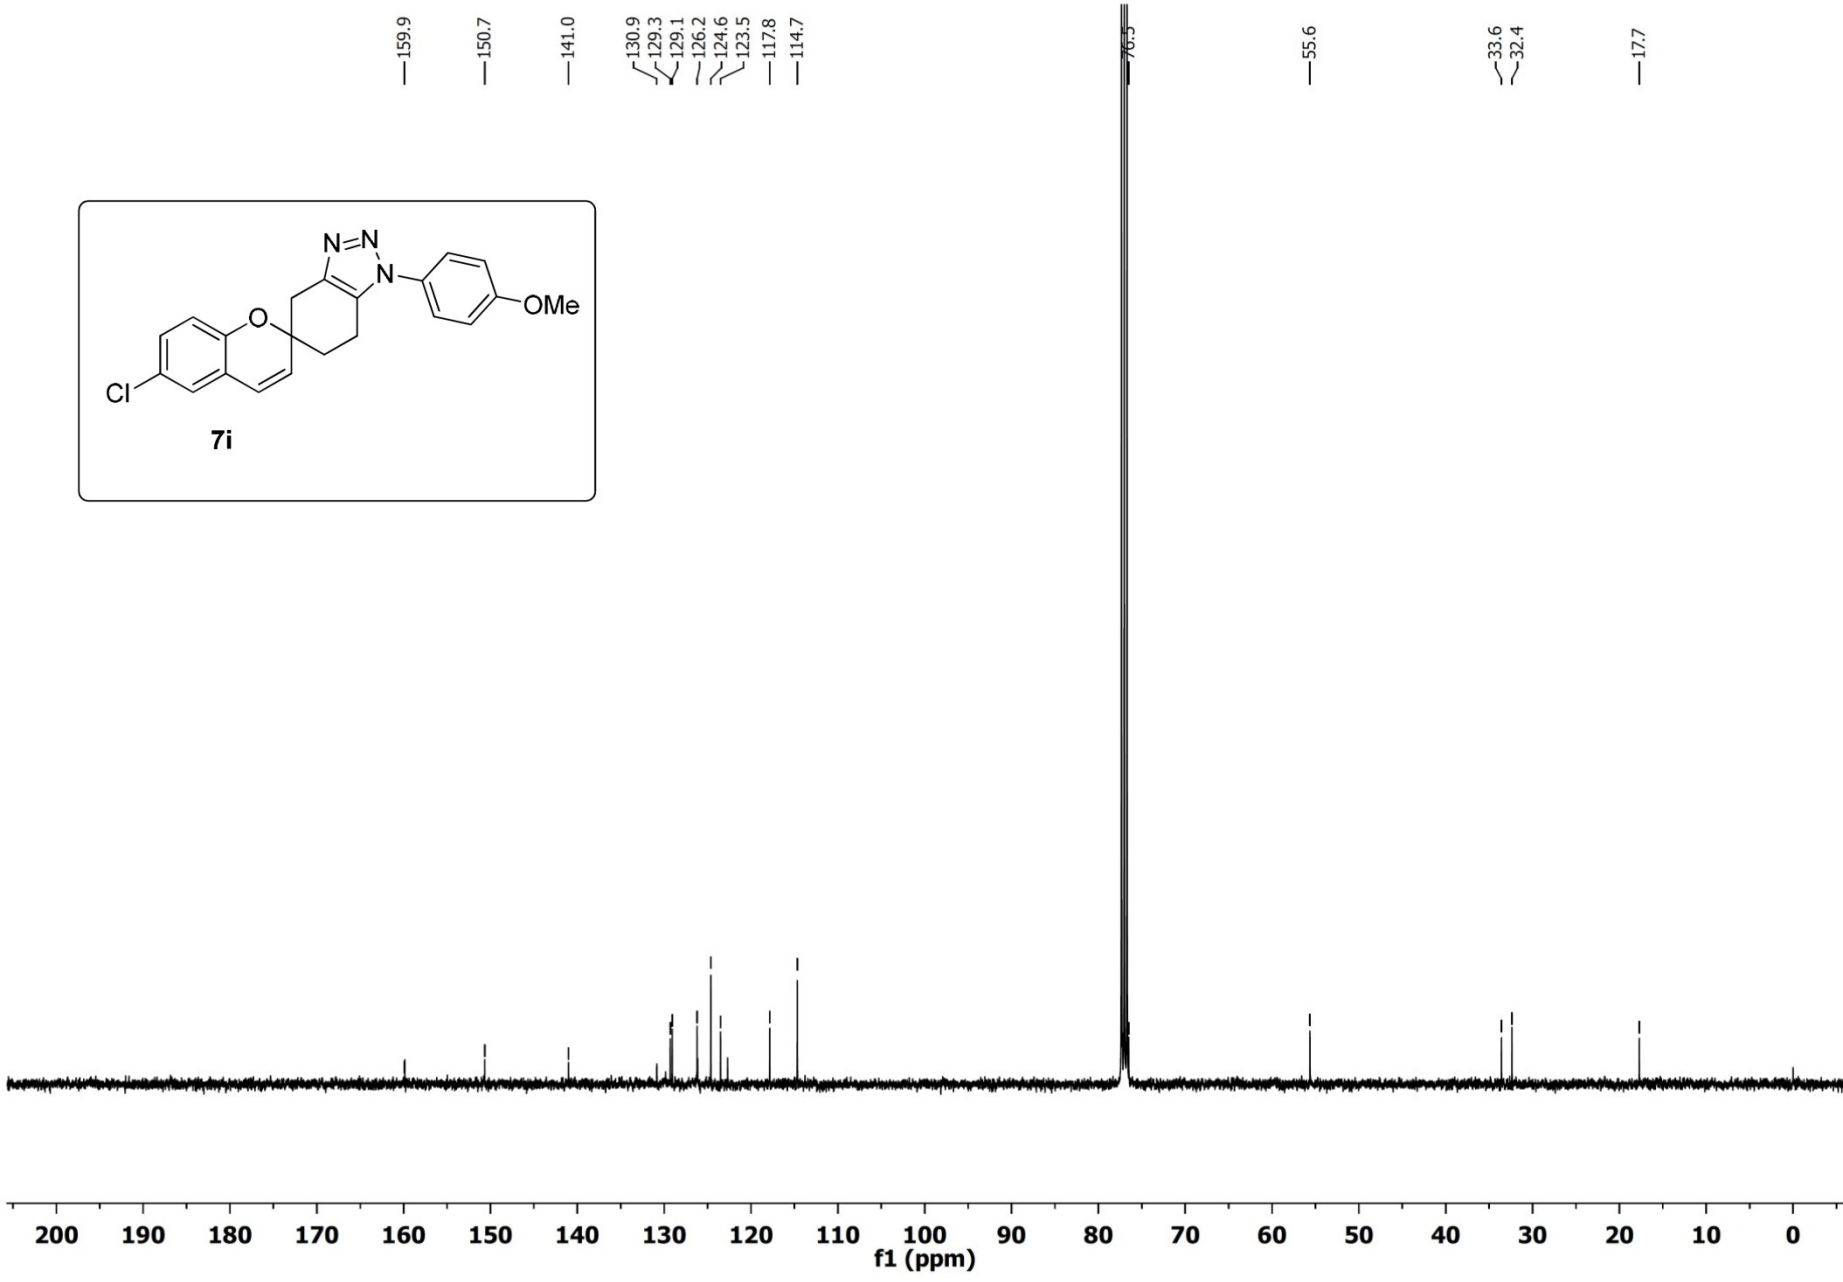

# ==== Organic and Biomolecular Chemistry Division, IICT ====

## Sample Information

Date Acquired : 11/14/2017 2:44:47 PM  
Sample Name : NSK  
Sample ID : SG-7  
Data File : 13-18-379-SG-7-1.lcd  
Method File : FCL-+@-.lcm

ESI-MS Spectrum  
NSK 13-18-379-SG-7-1.lcd

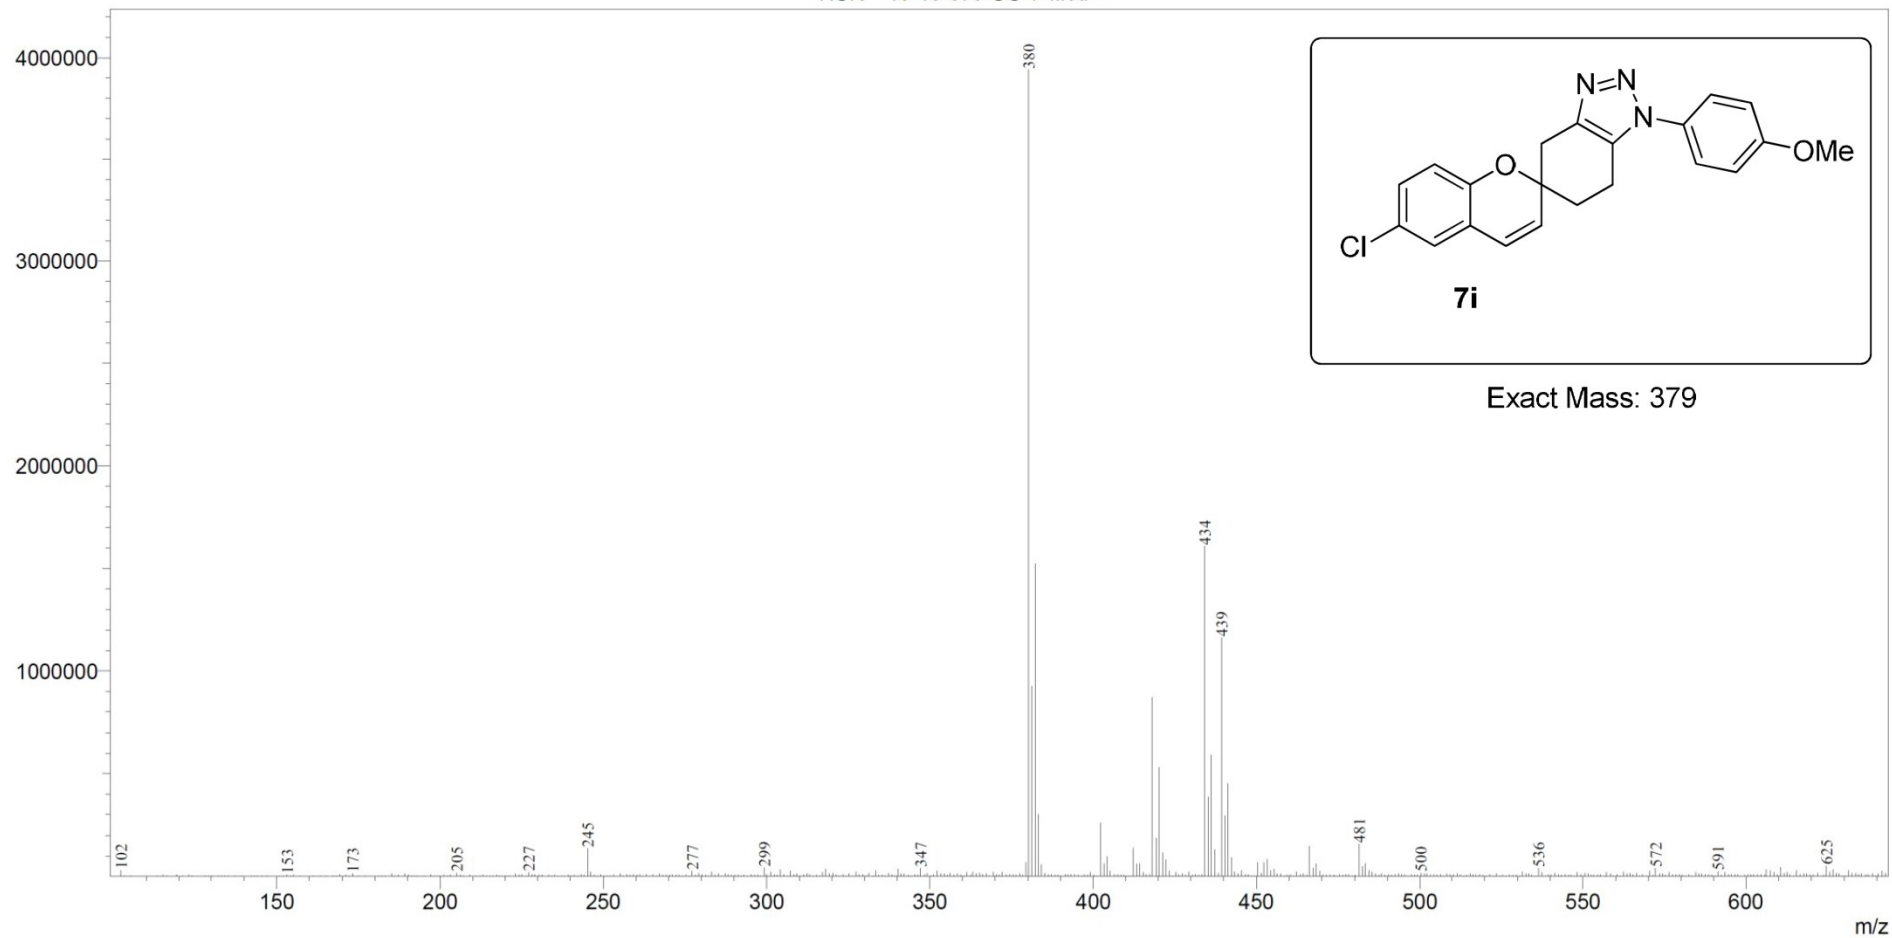

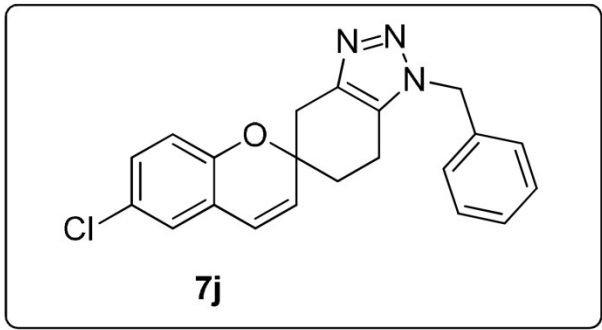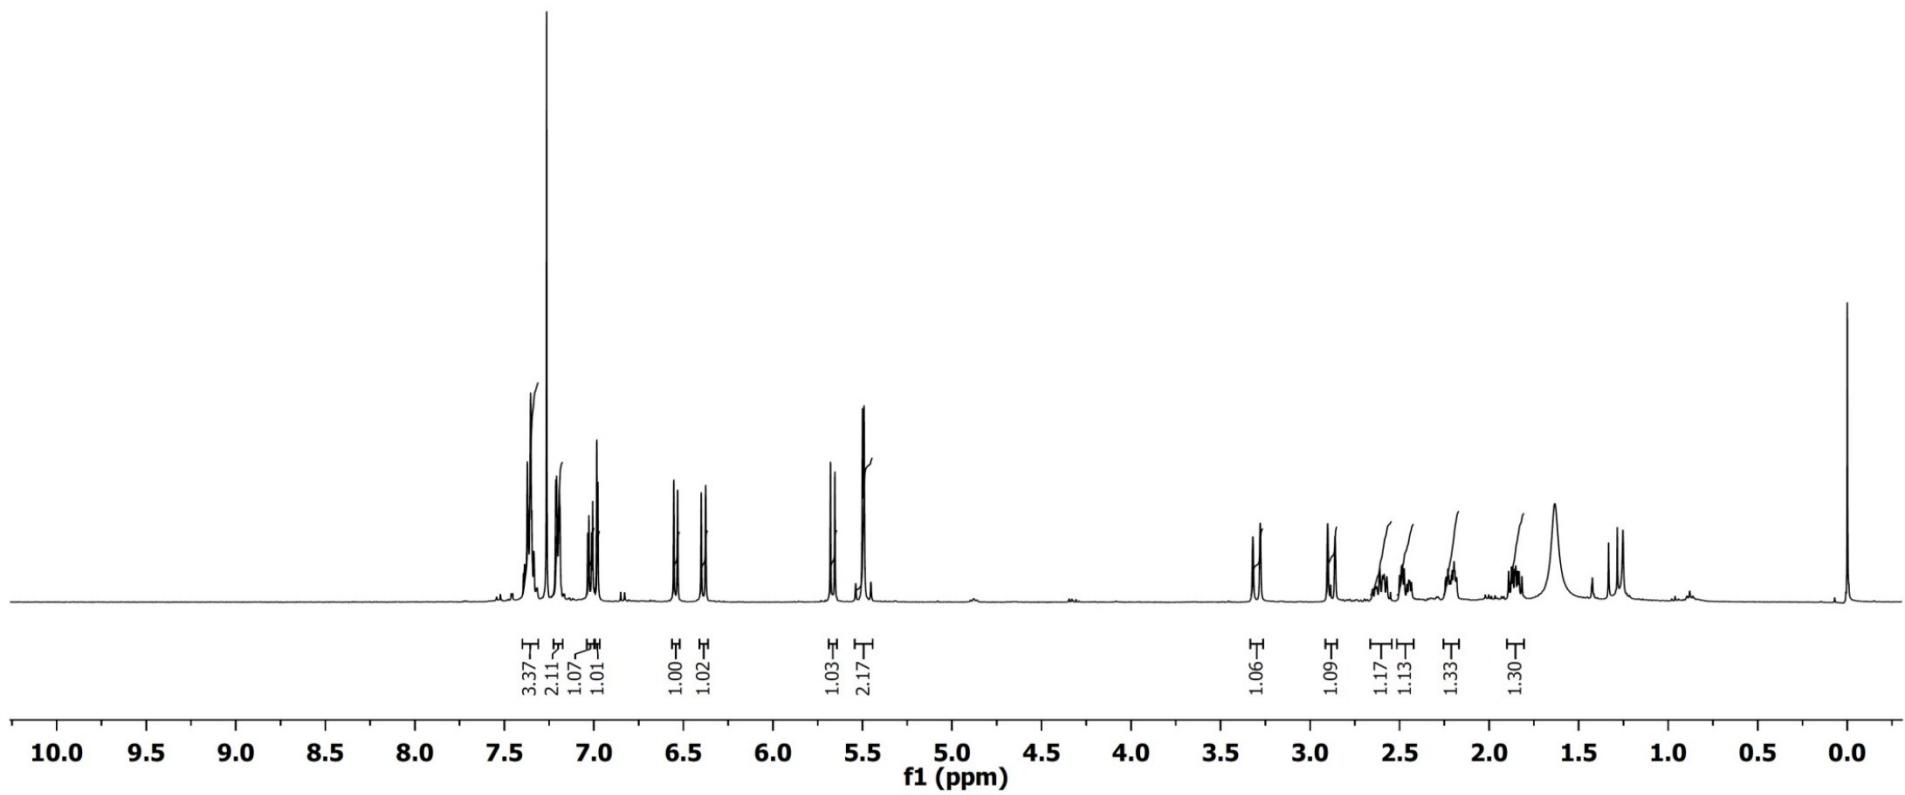

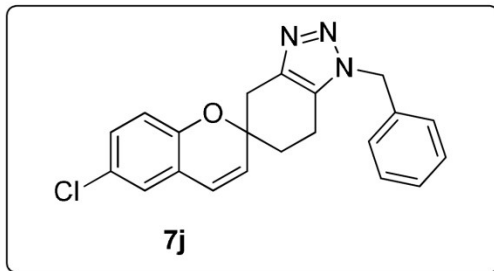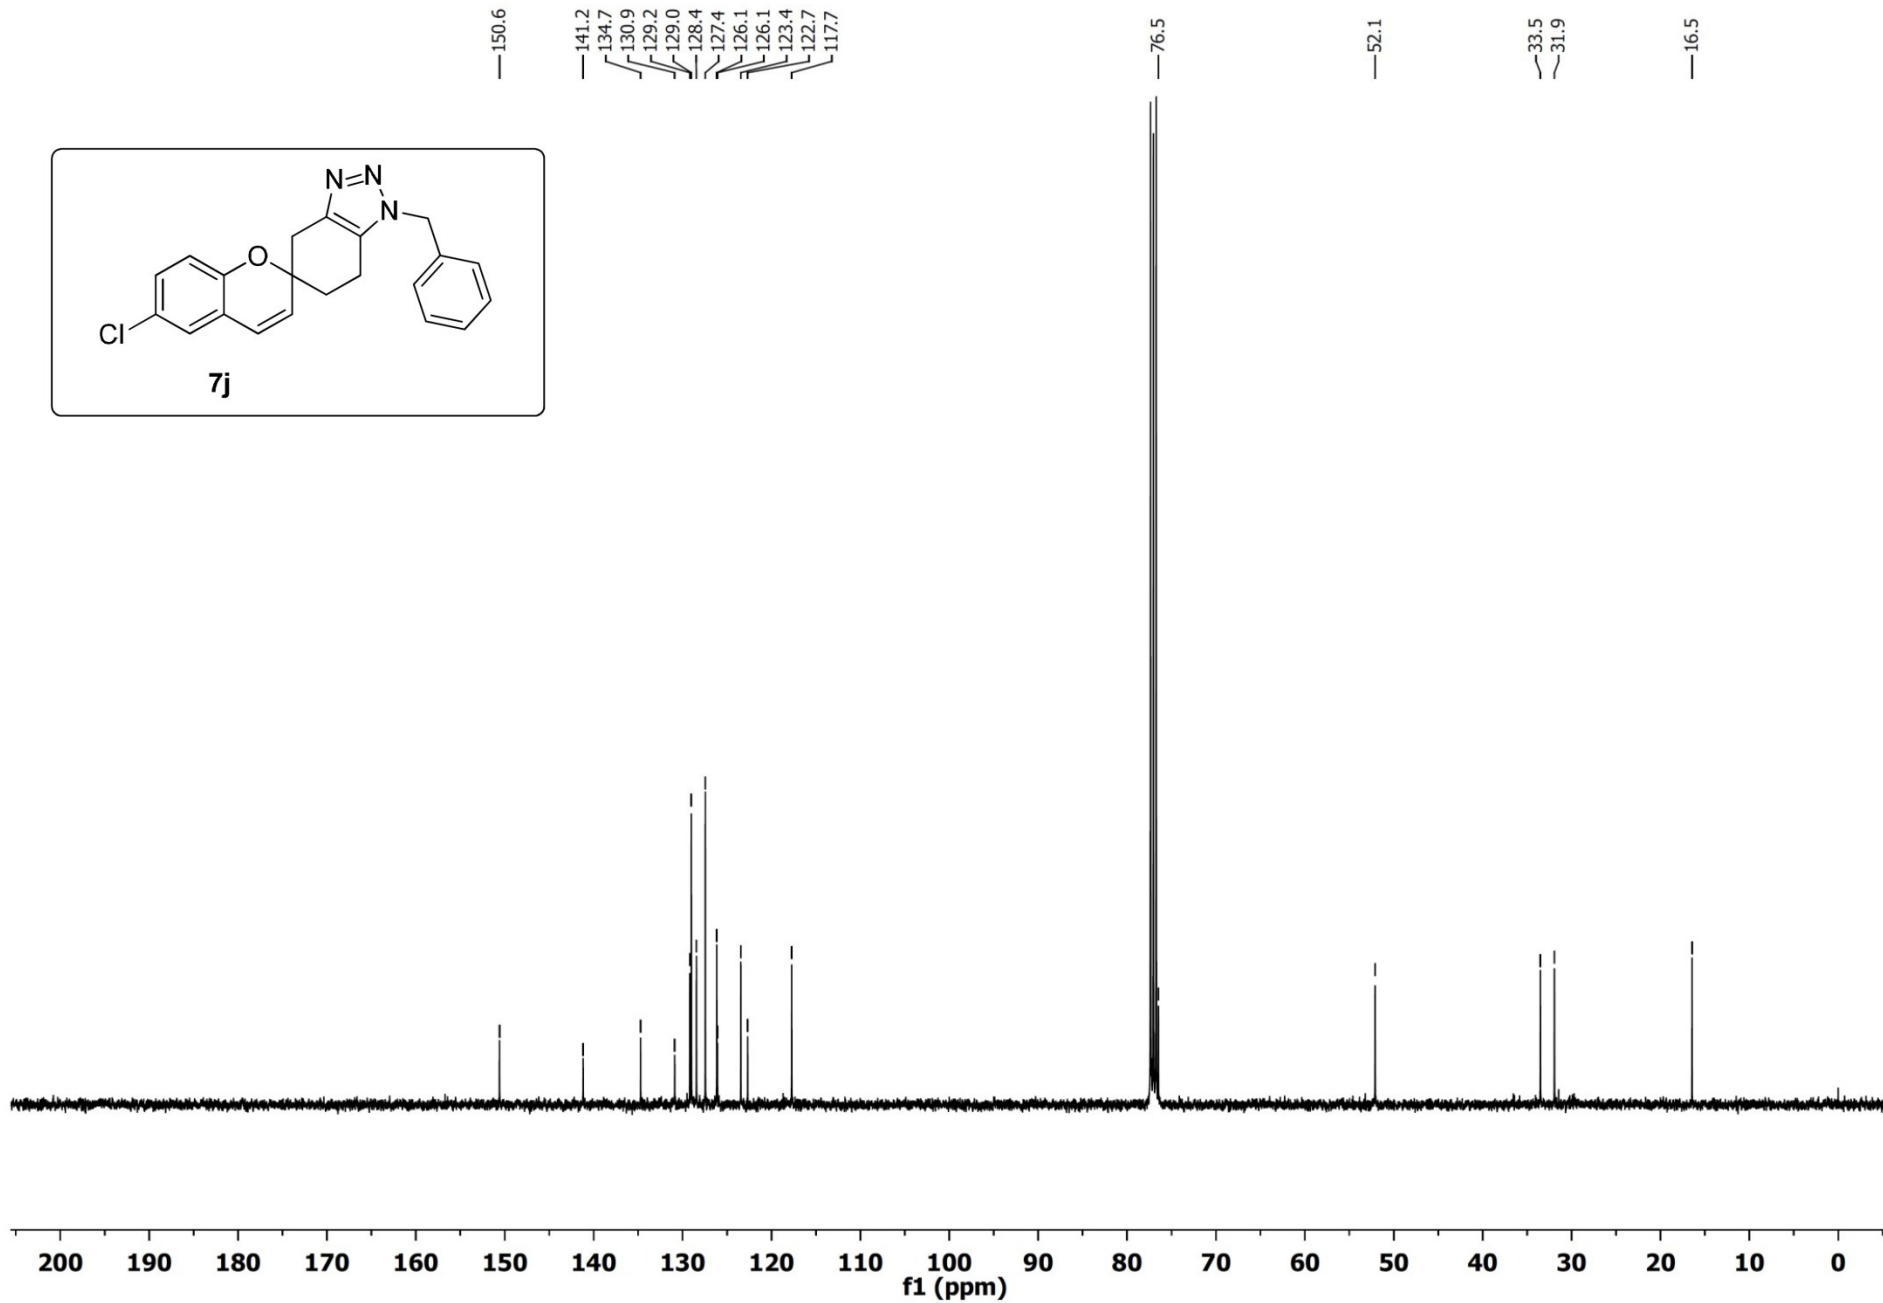



# ==== Organic and Biomolecular Chemistry Division, IICT ====

## Sample Information

Date Acquired : 11/14/2017 2:47:34 PM  
Sample Name : NSK  
Sample ID : SG-7  
Data File : 13-19-363-SG-7-J.lcd  
Method File : FCL-+@-.lcm

## ESI-MS Spectrum NSK 13-19-363-SG-7-J.lcd

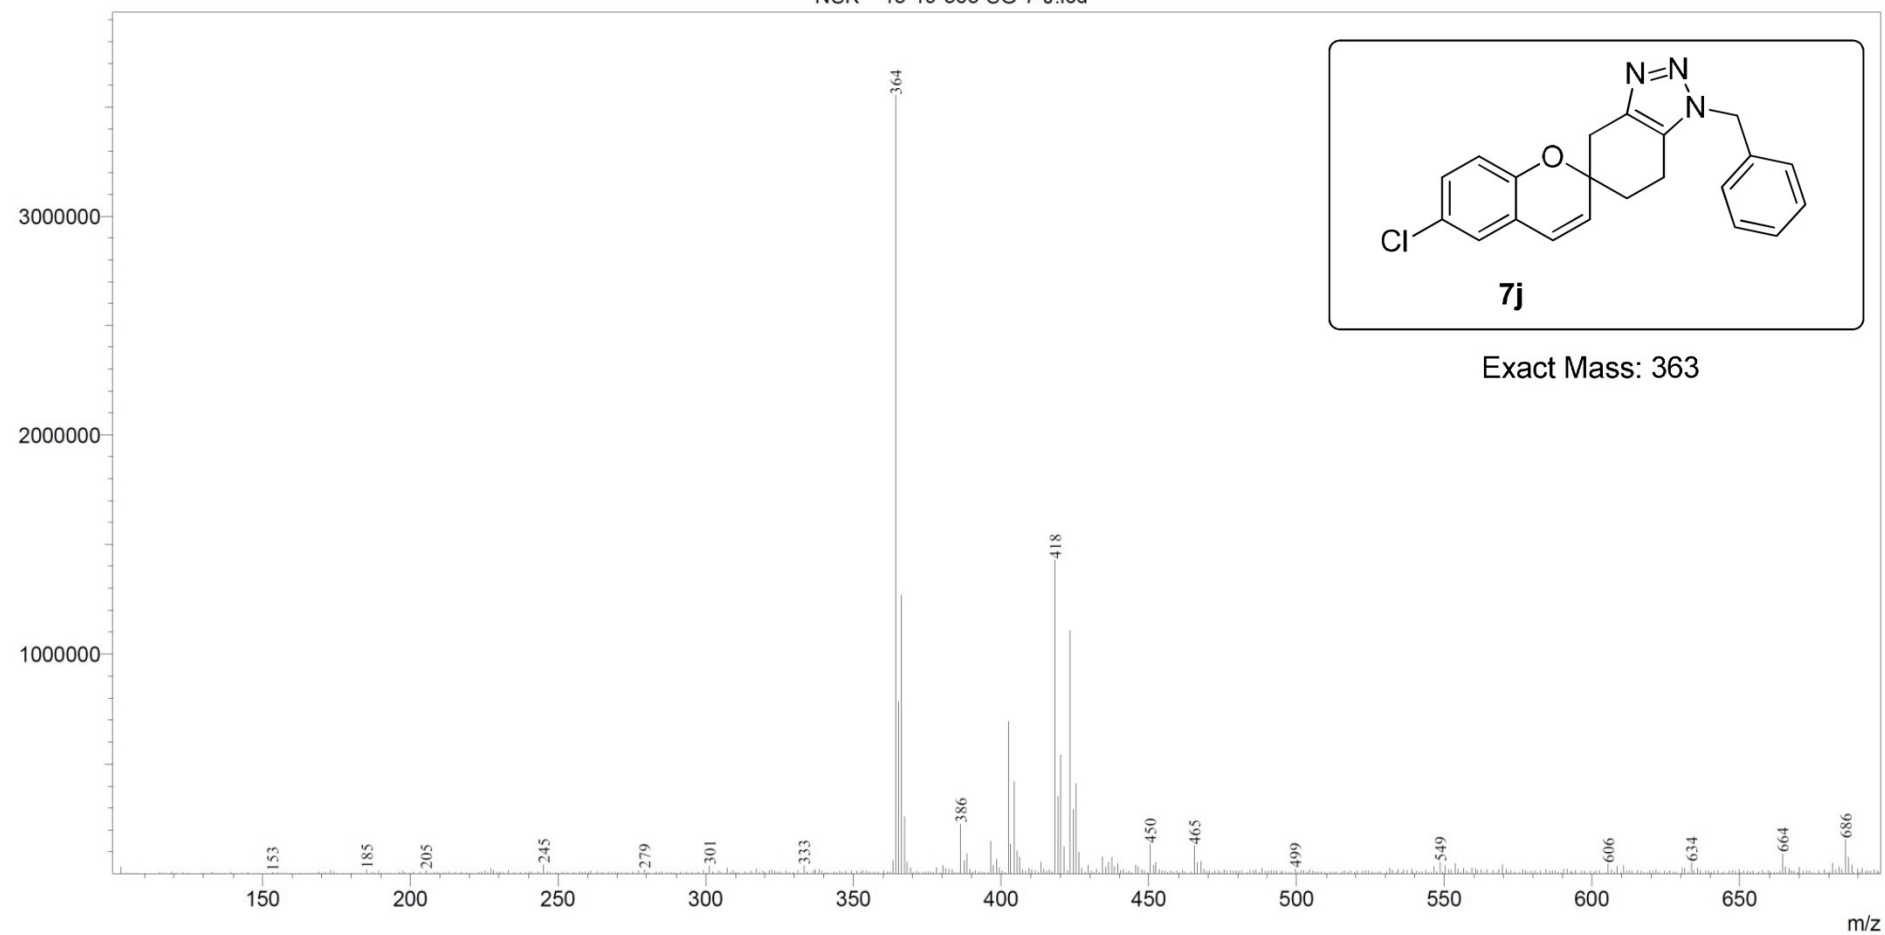

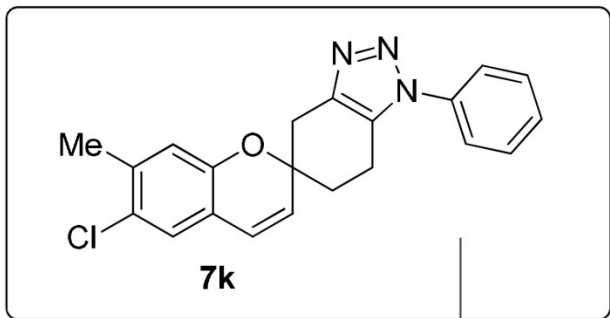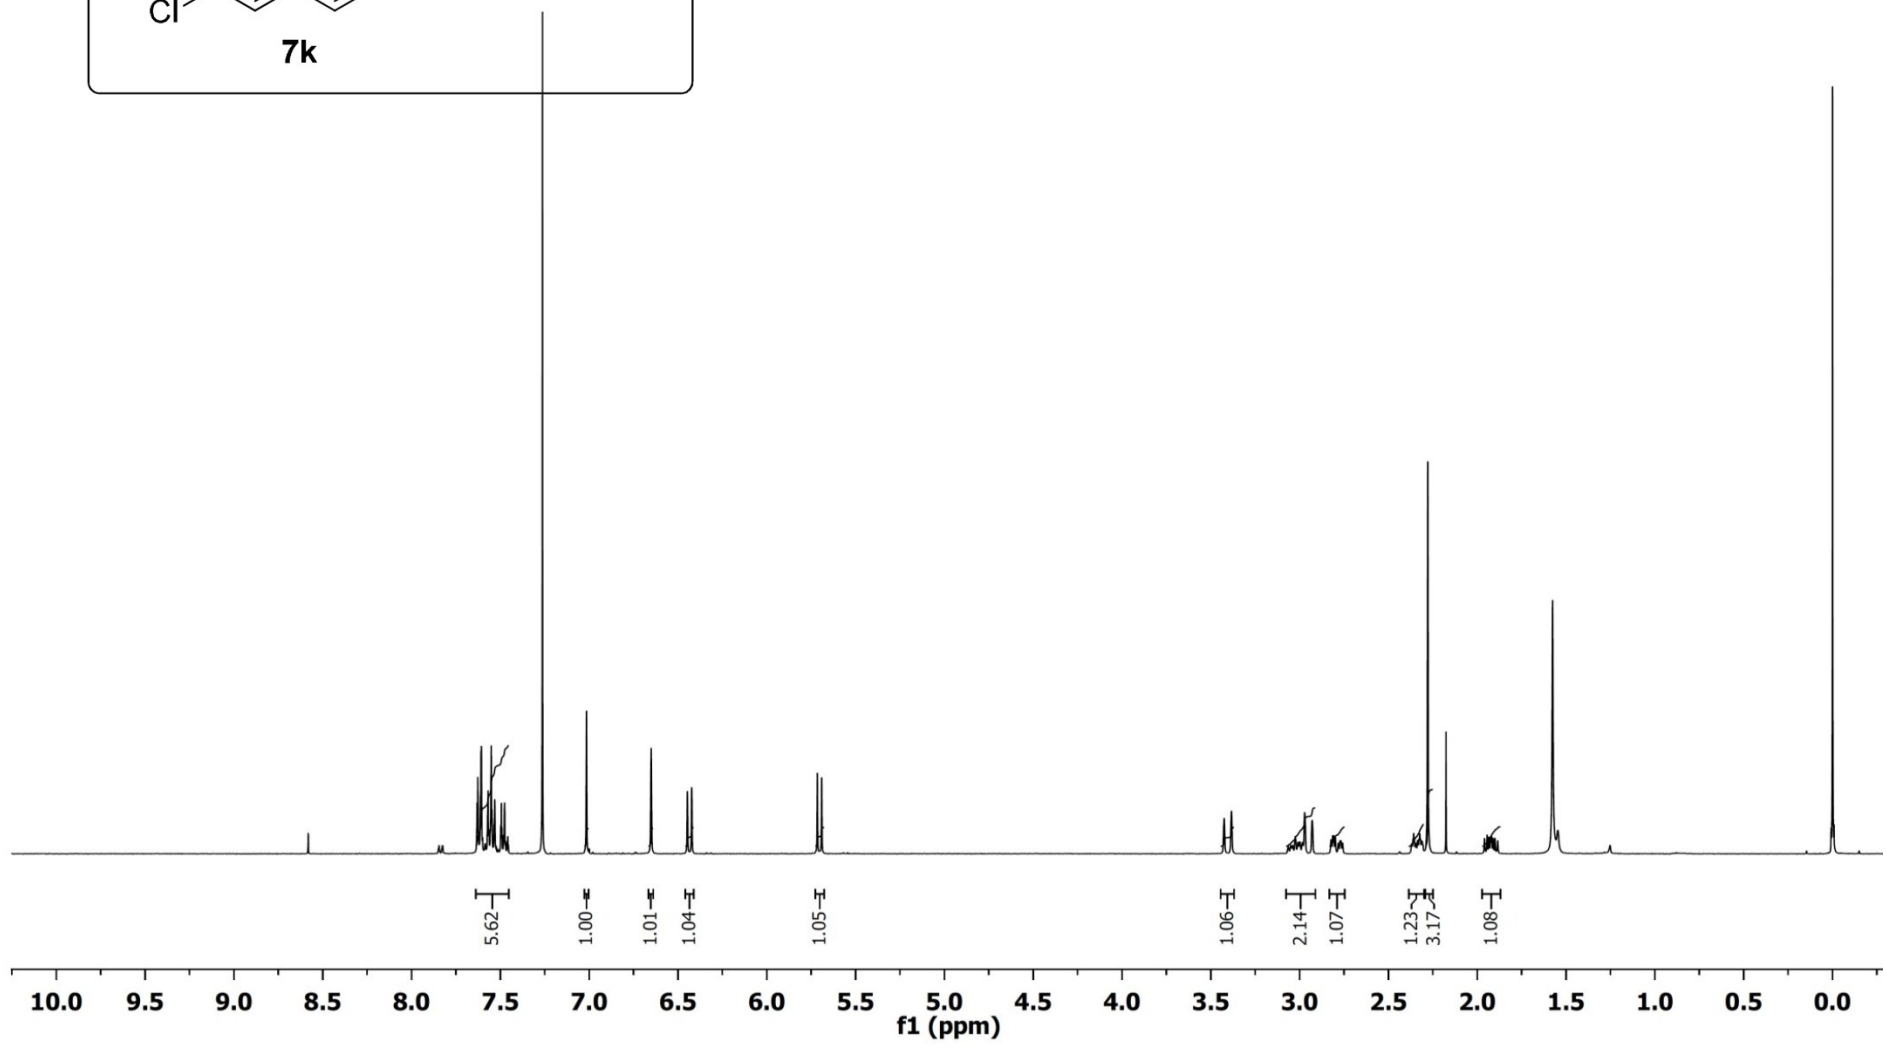

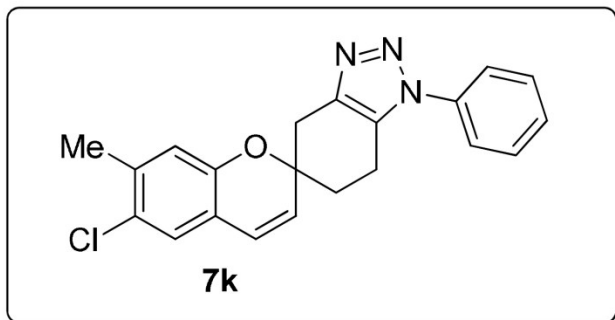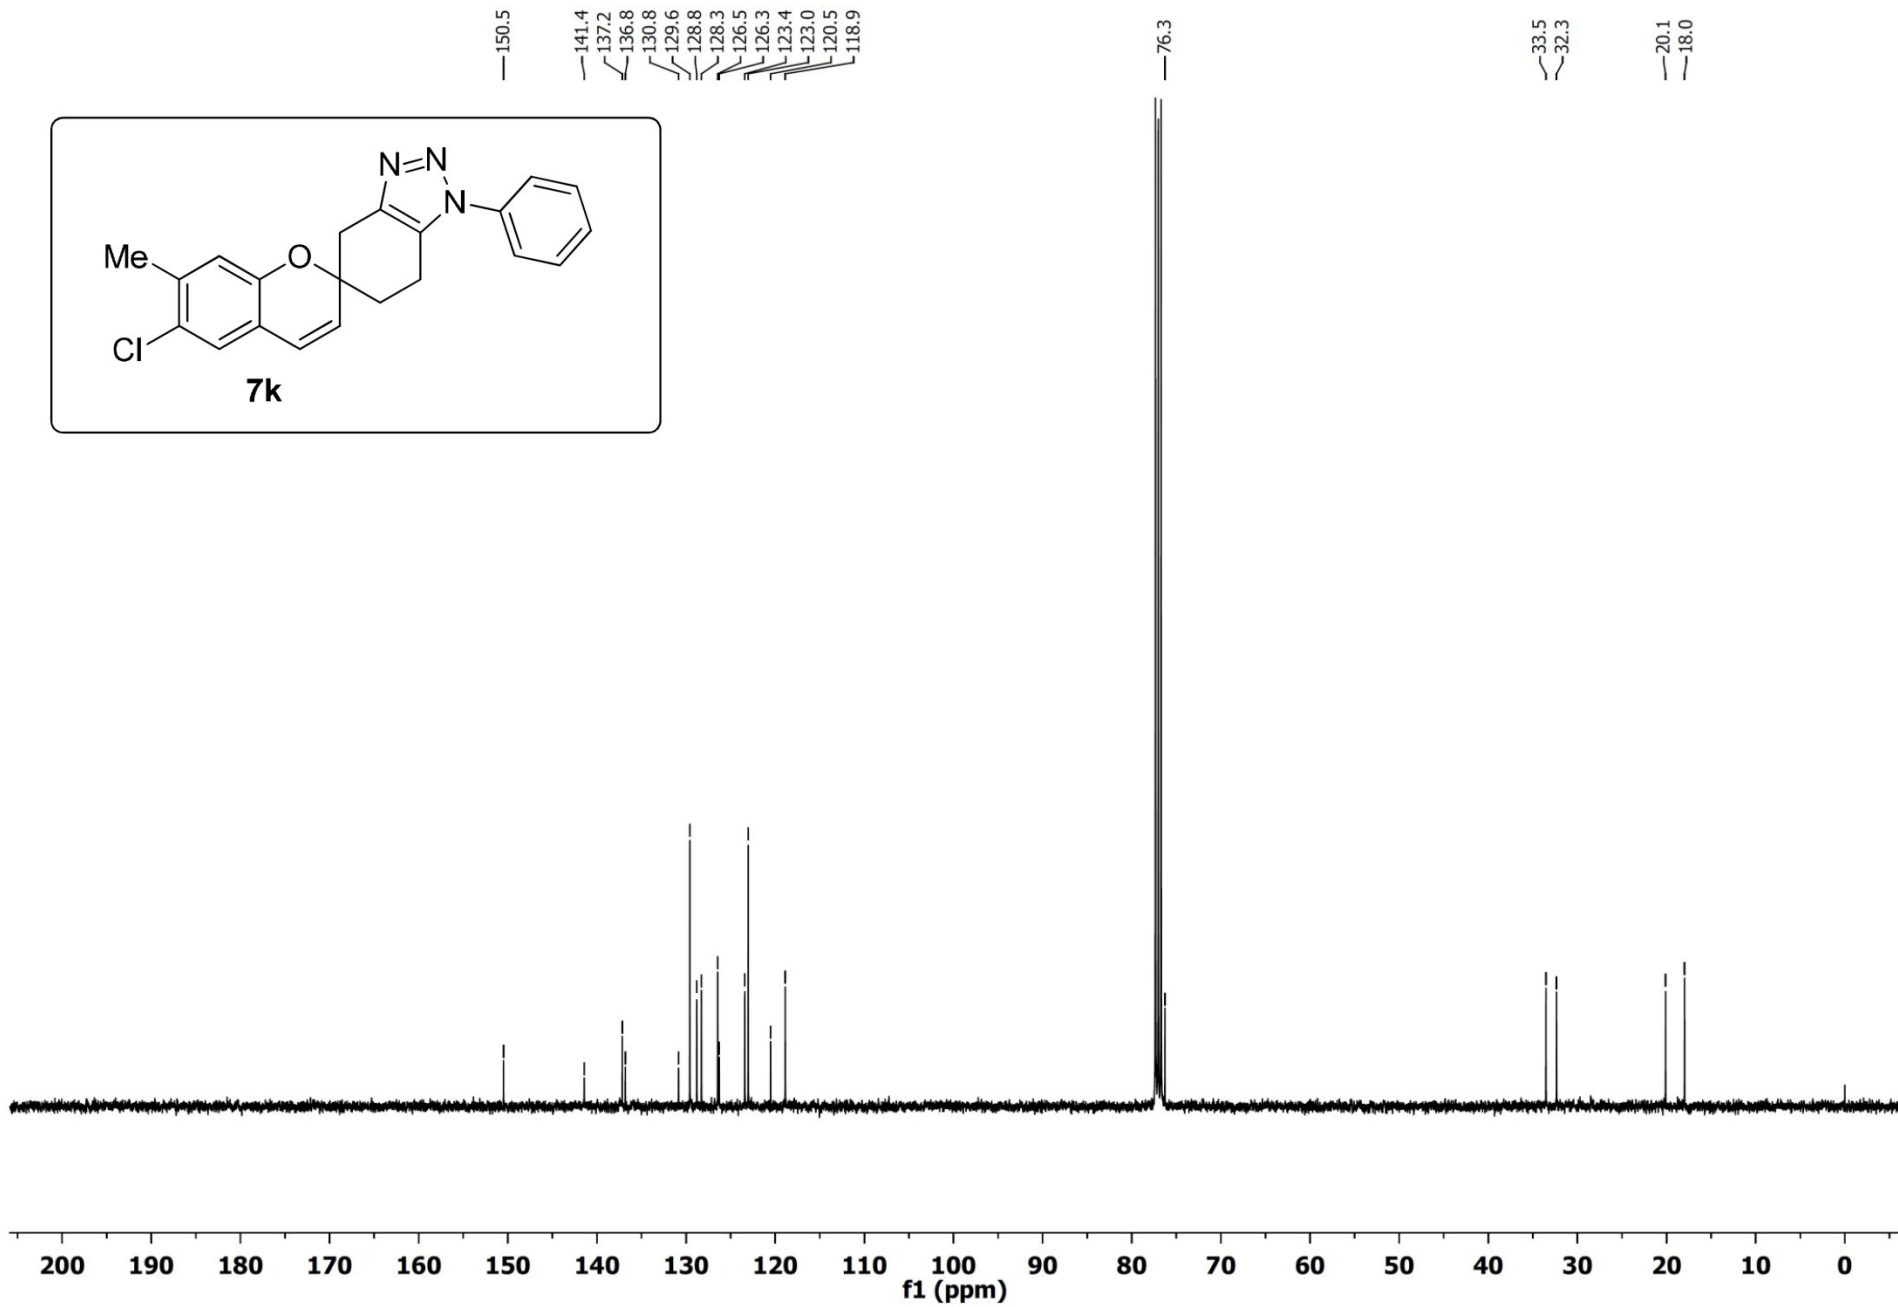

# ==== Organic and Biomolecular Chemistry Division, IICT ====

## Sample Information

Date Acquired : 11/14/2017 2:50:24 PM  
Sample Name : NSK  
Sample ID : SG-7  
Data File : 13-20-363-SG-7-K.lcd  
Method File : FCL-+@-.lcm

ESI-MS Spectrum  
NSK 13-20-363-SG-7-K.lcd

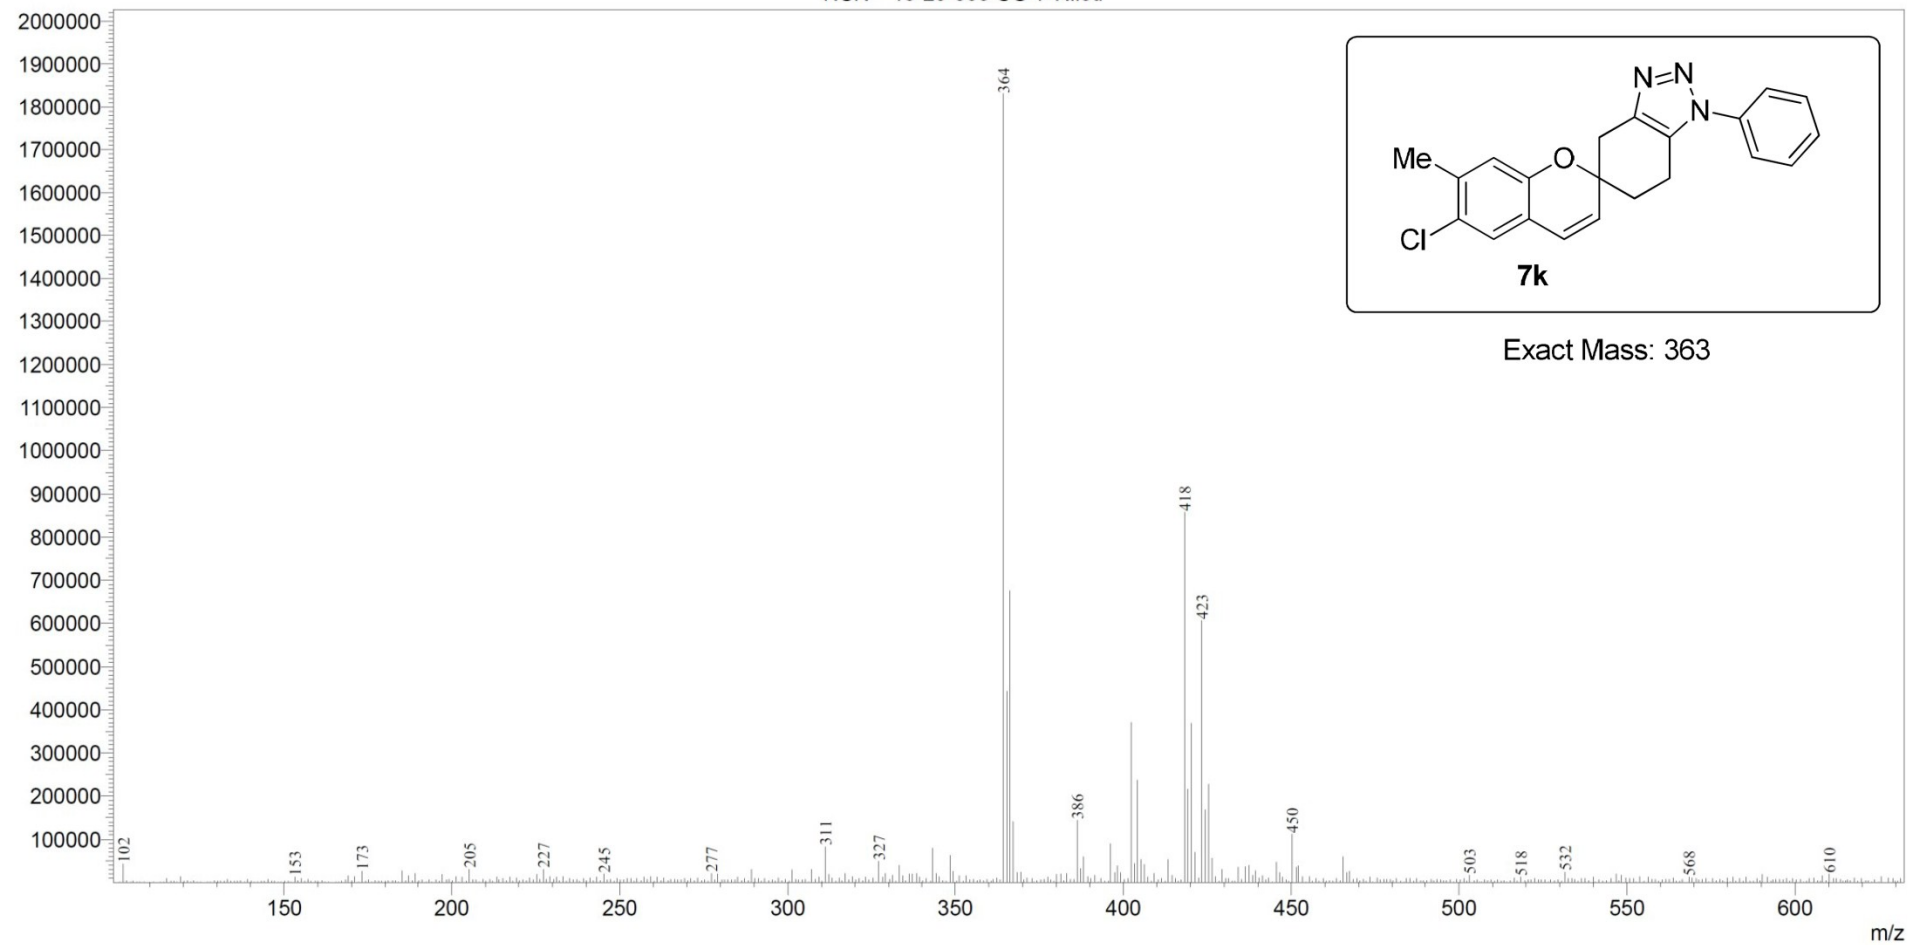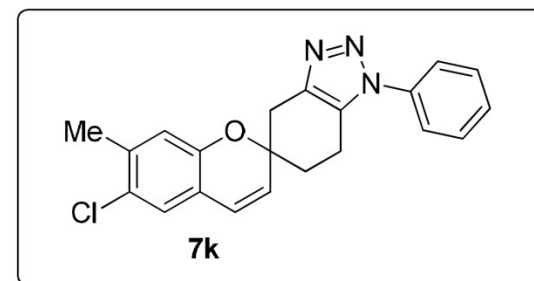

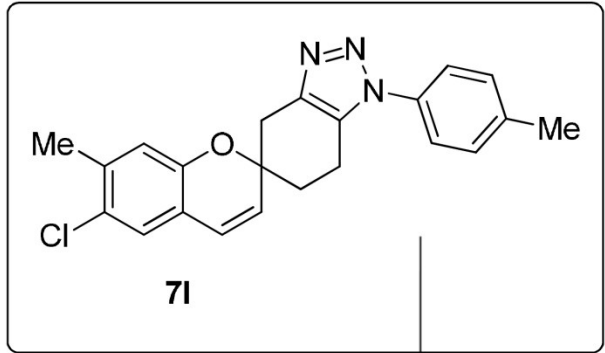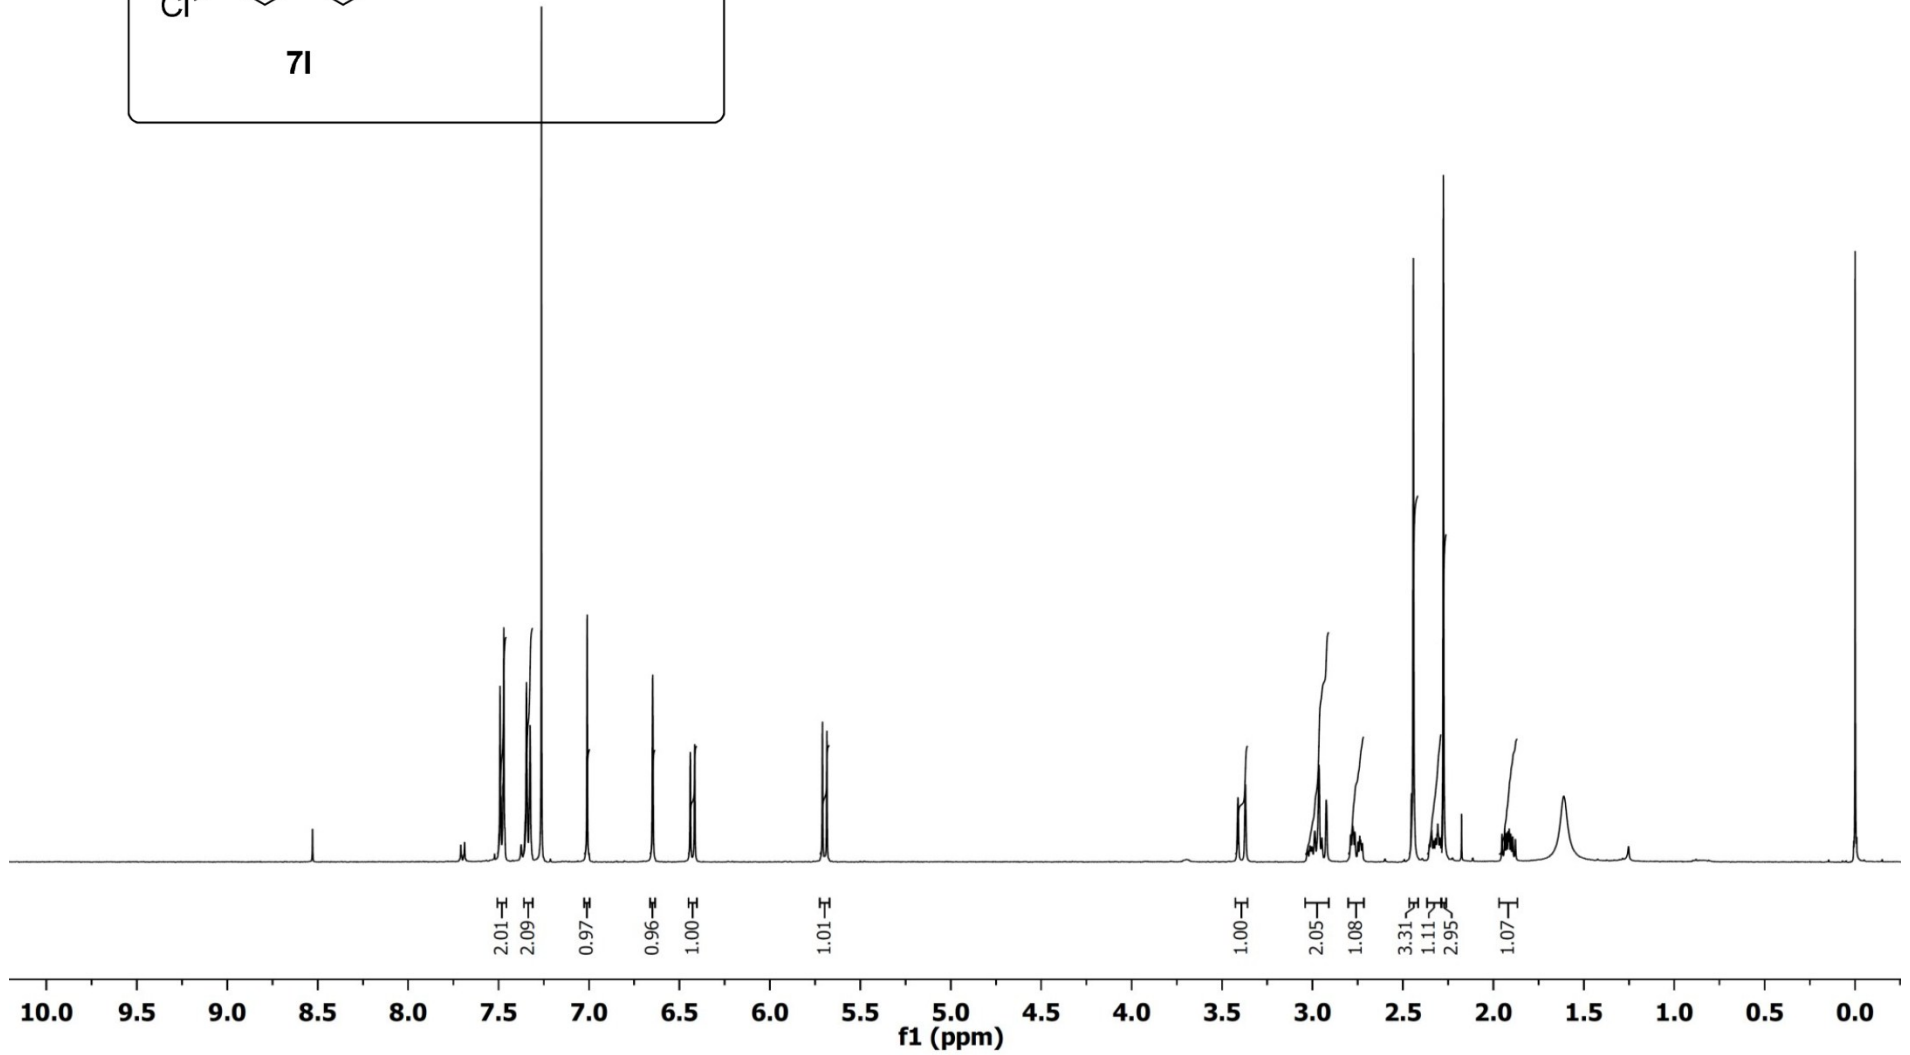

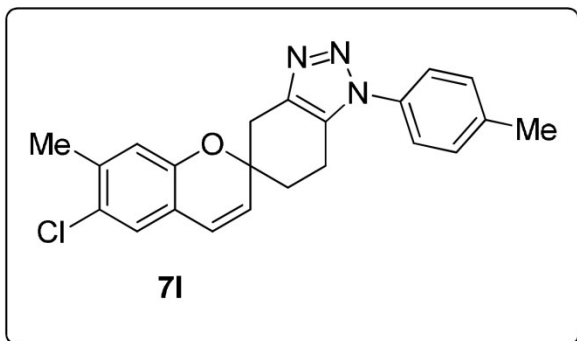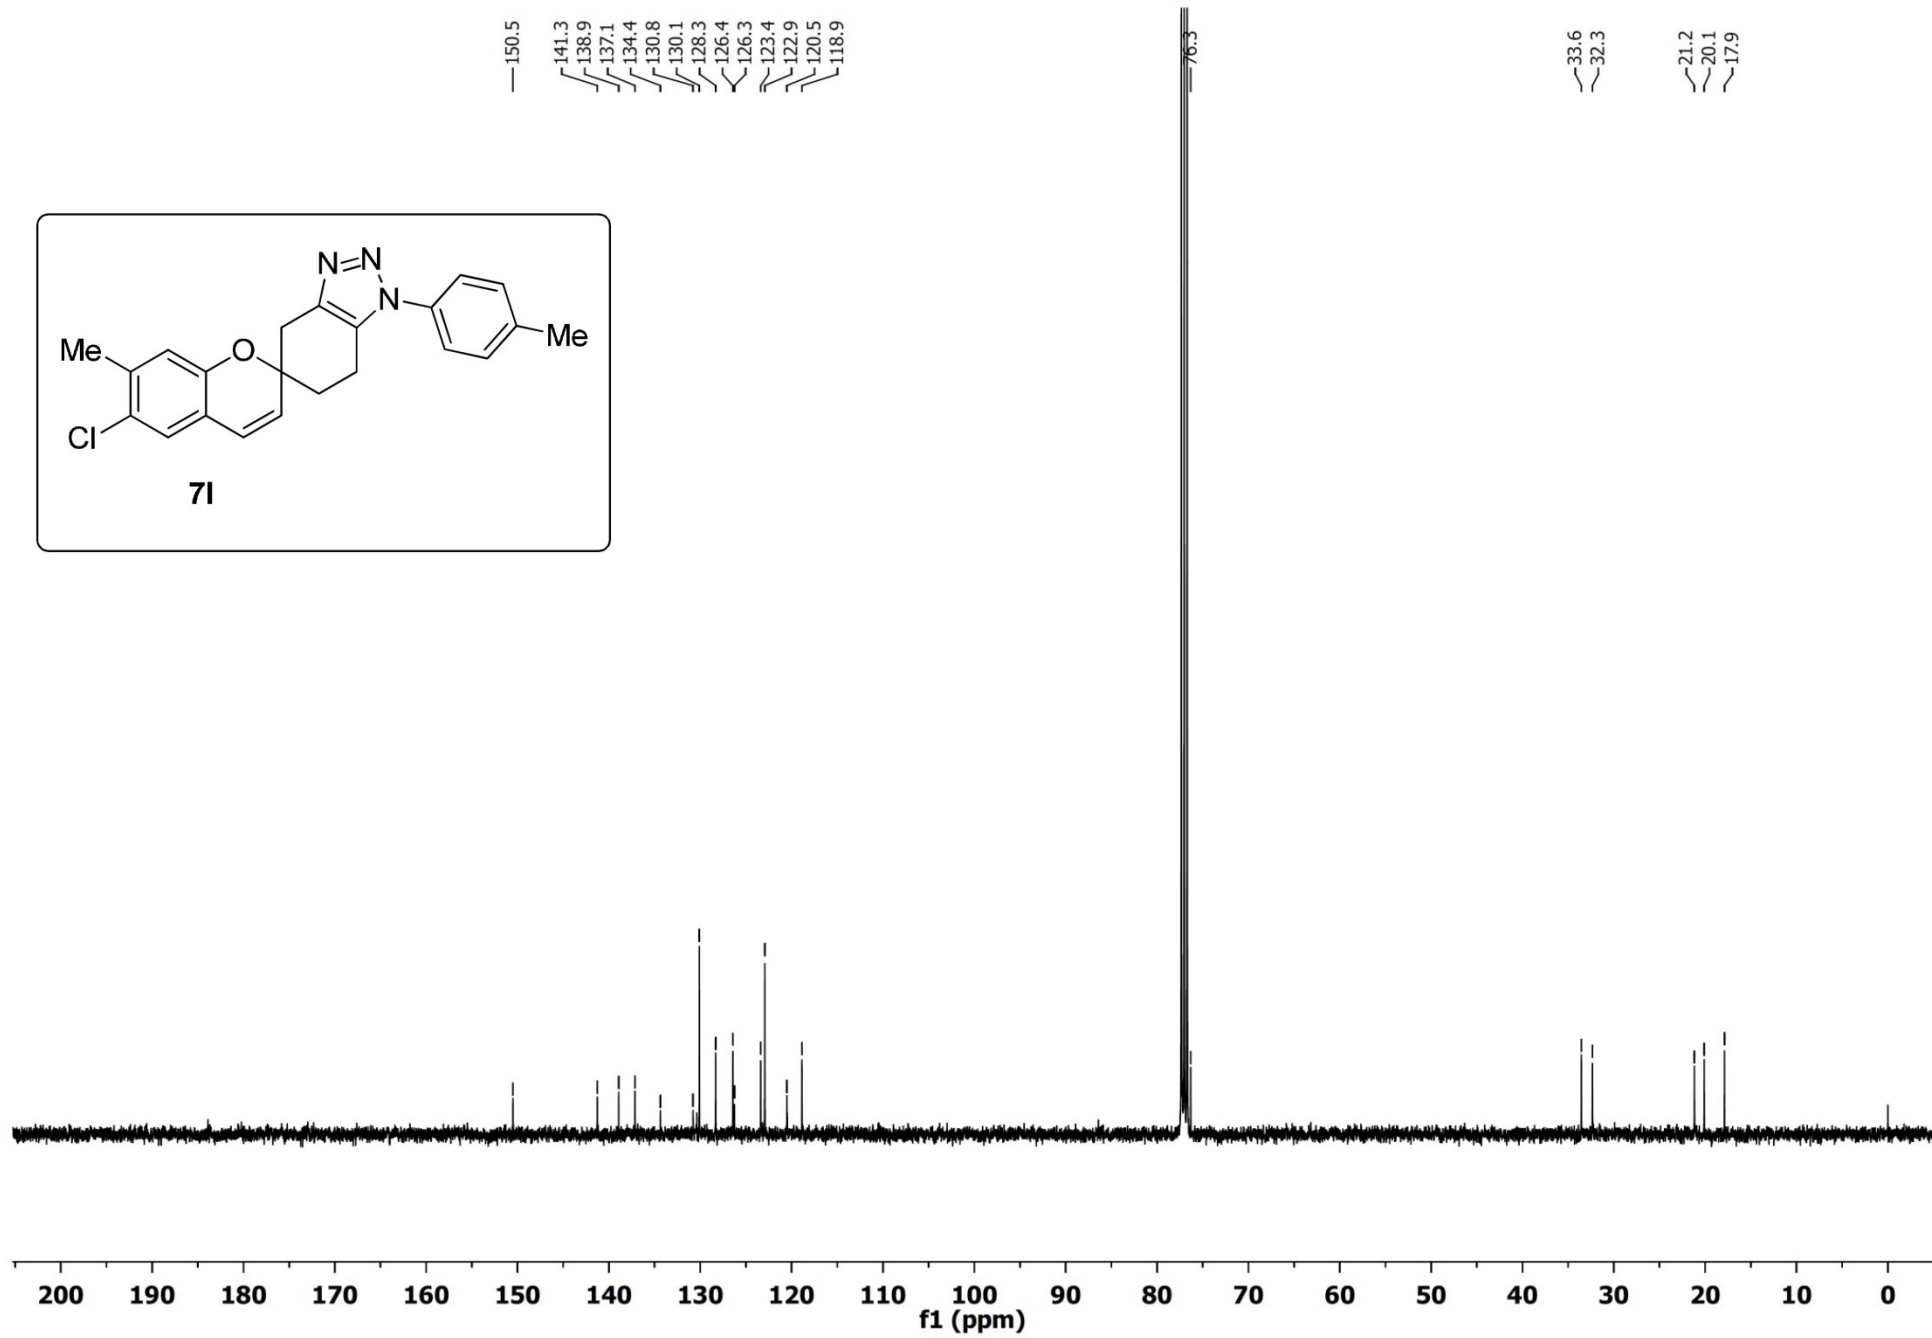

### Qualitative Plot Window Report

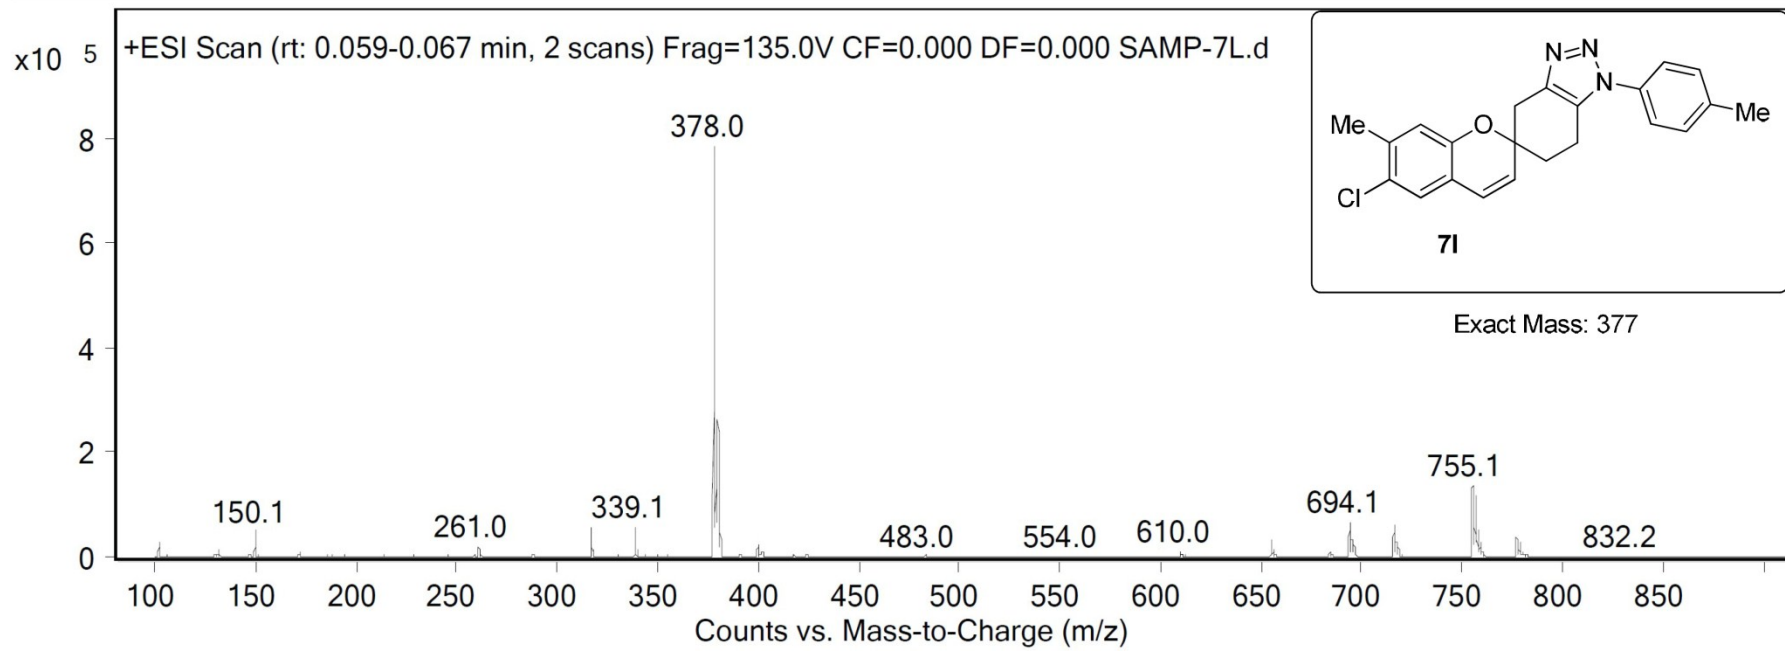

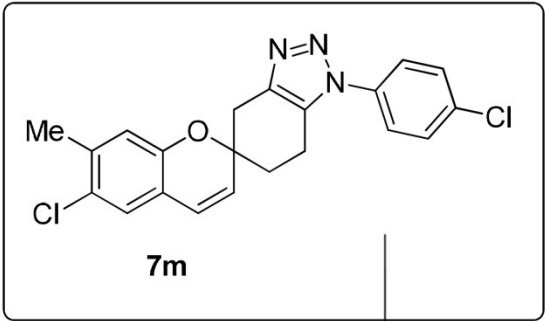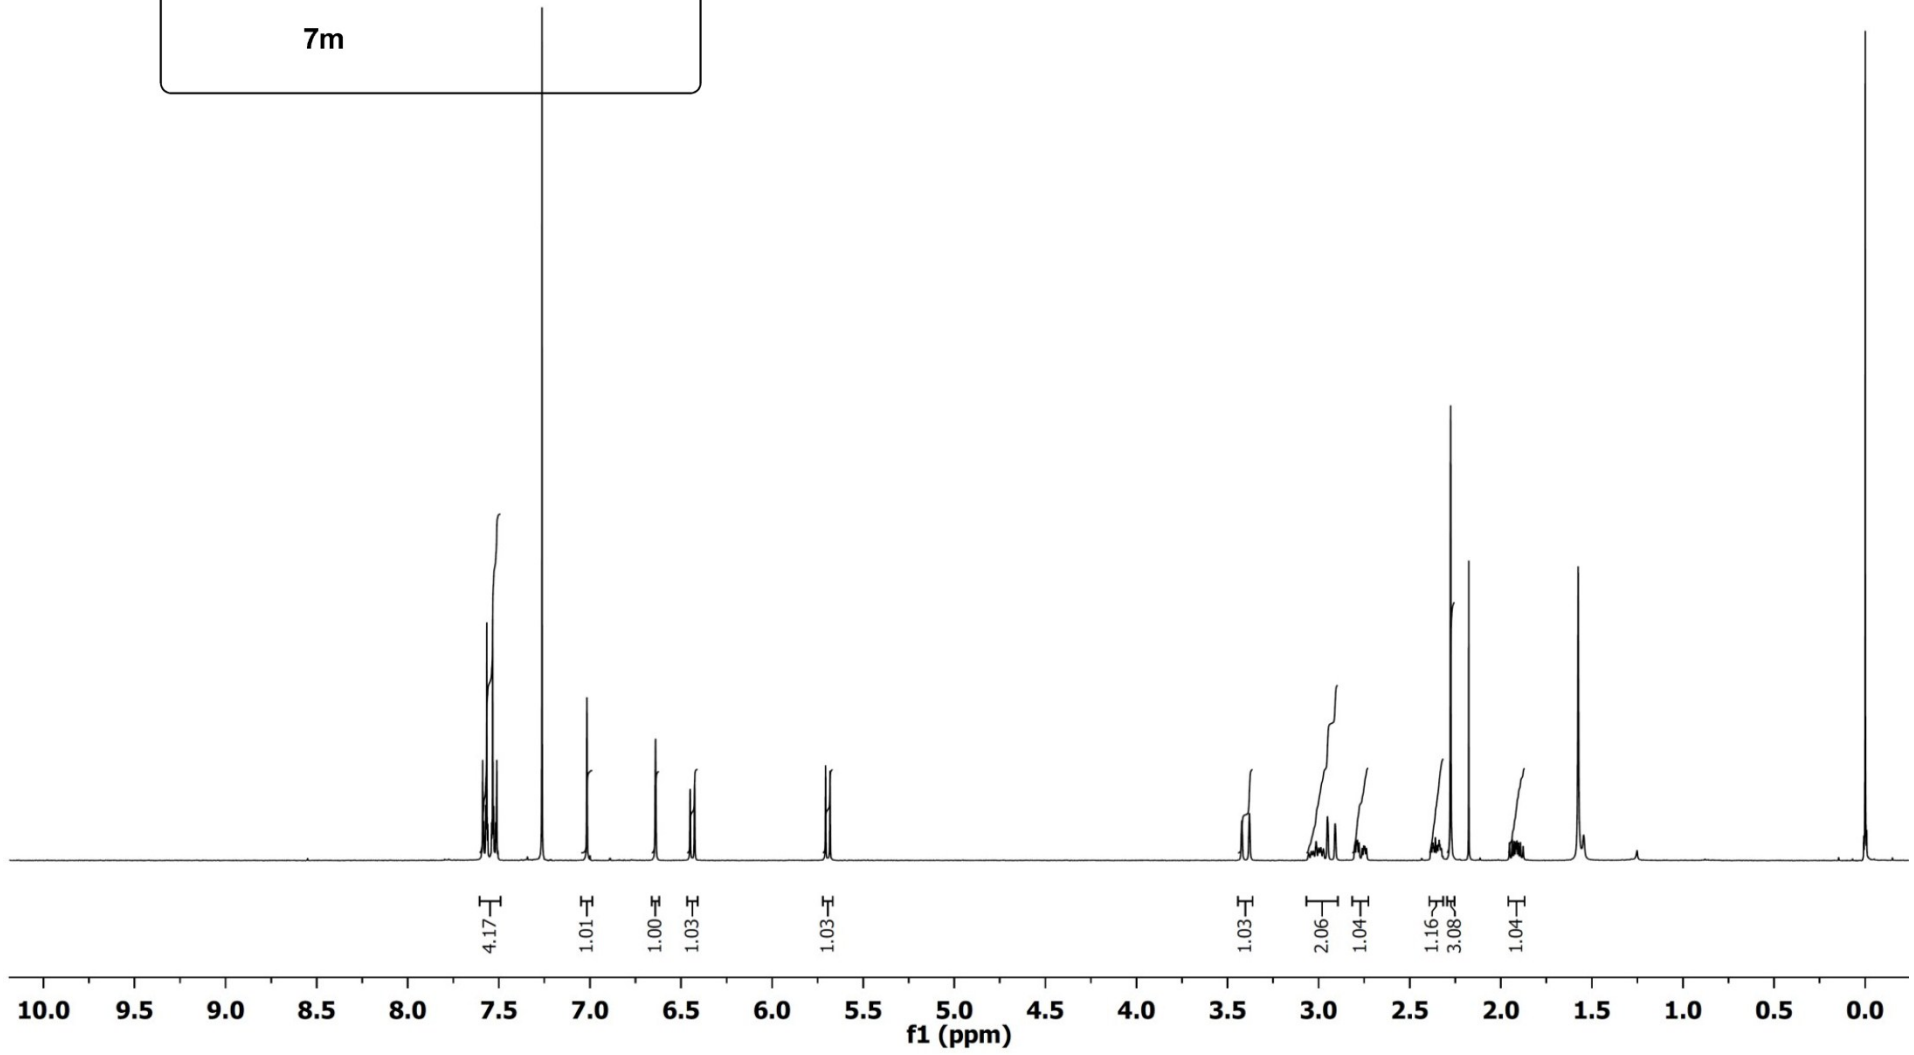



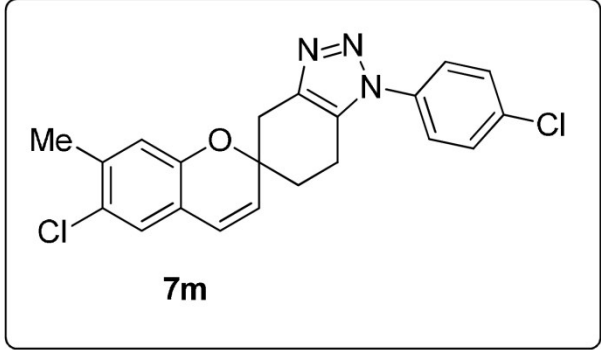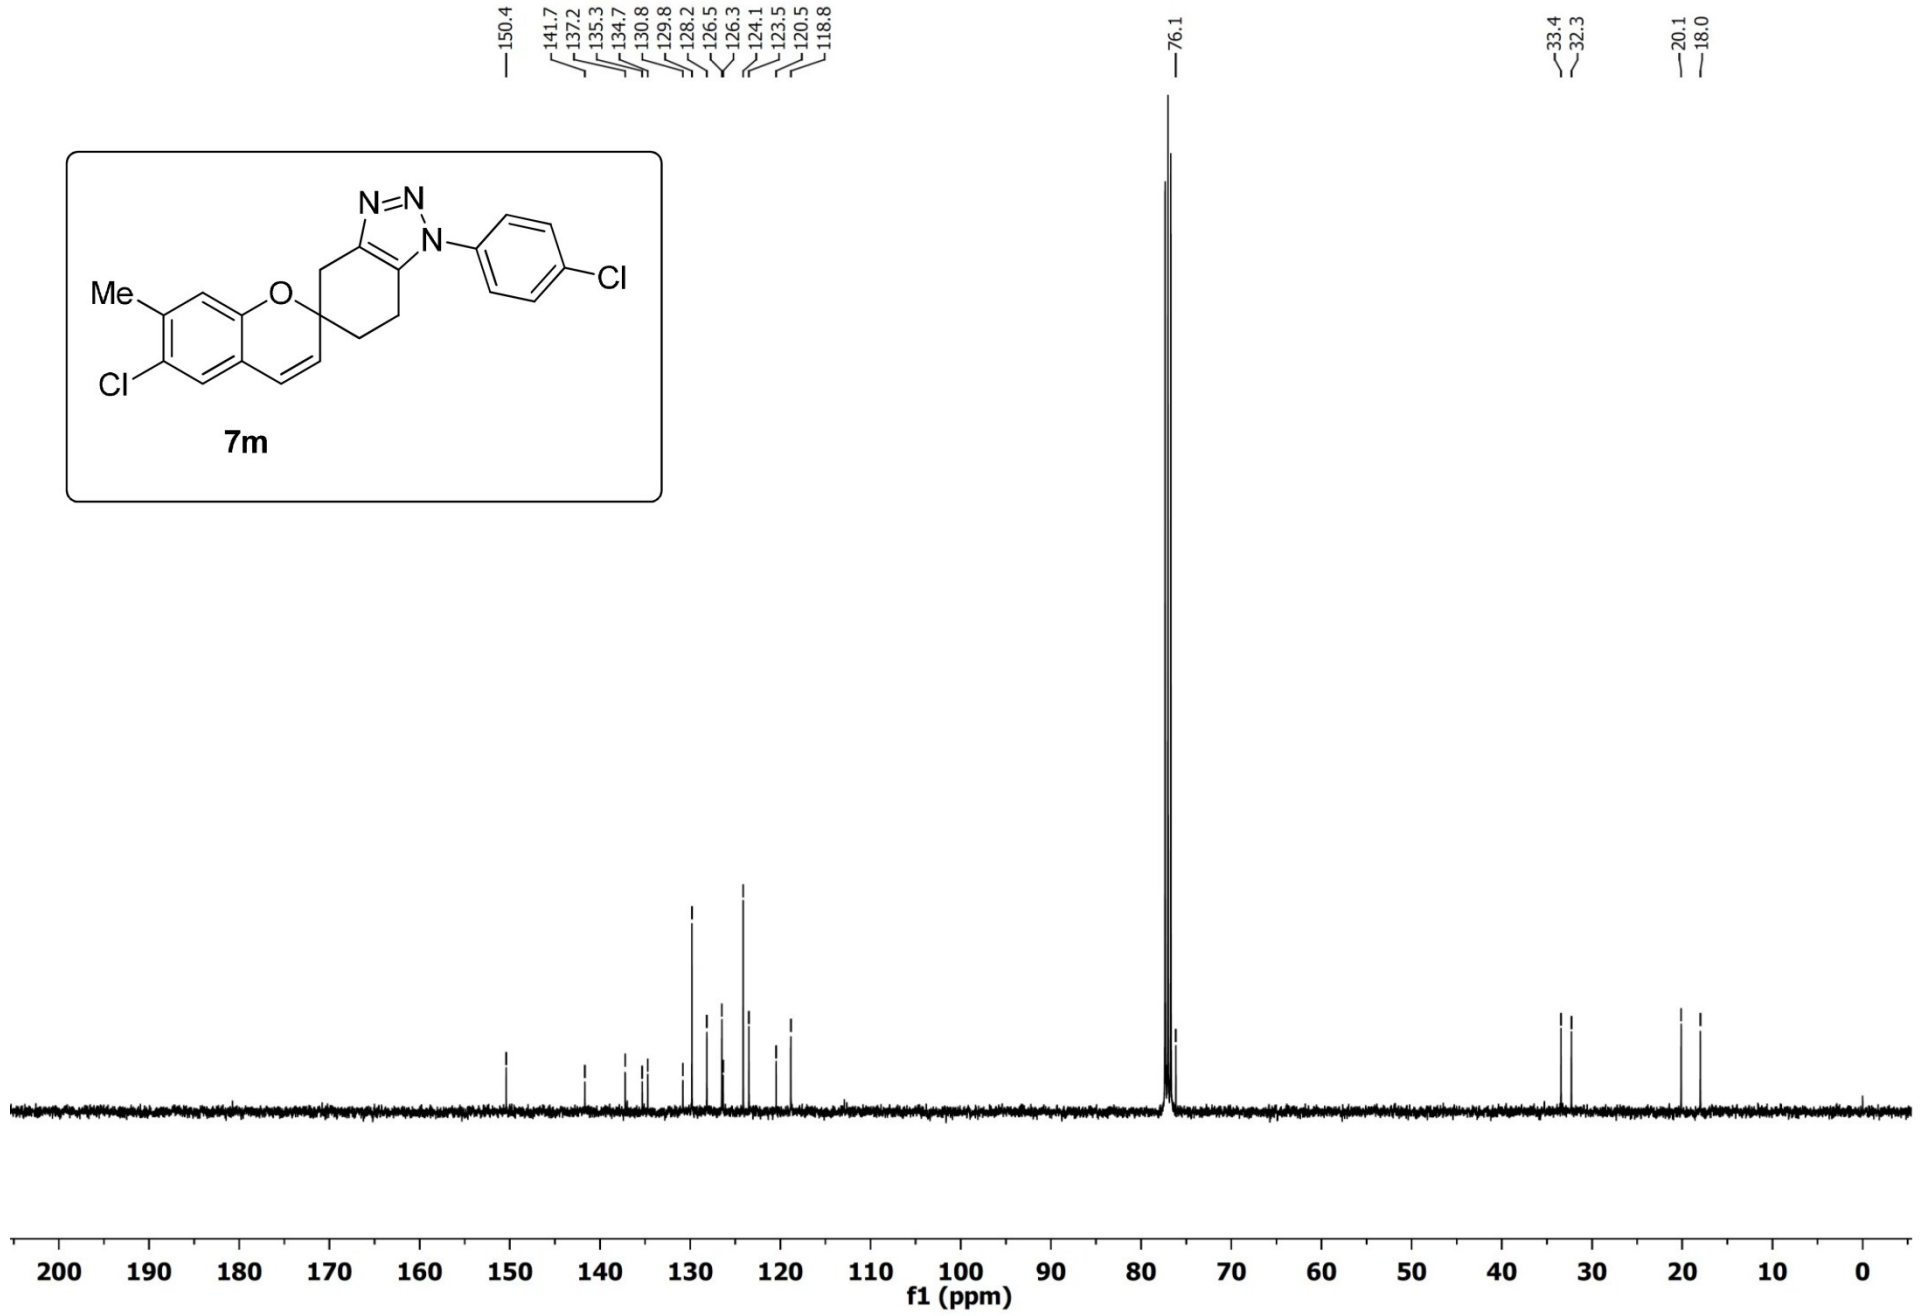

### Qualitative Plot Window Report

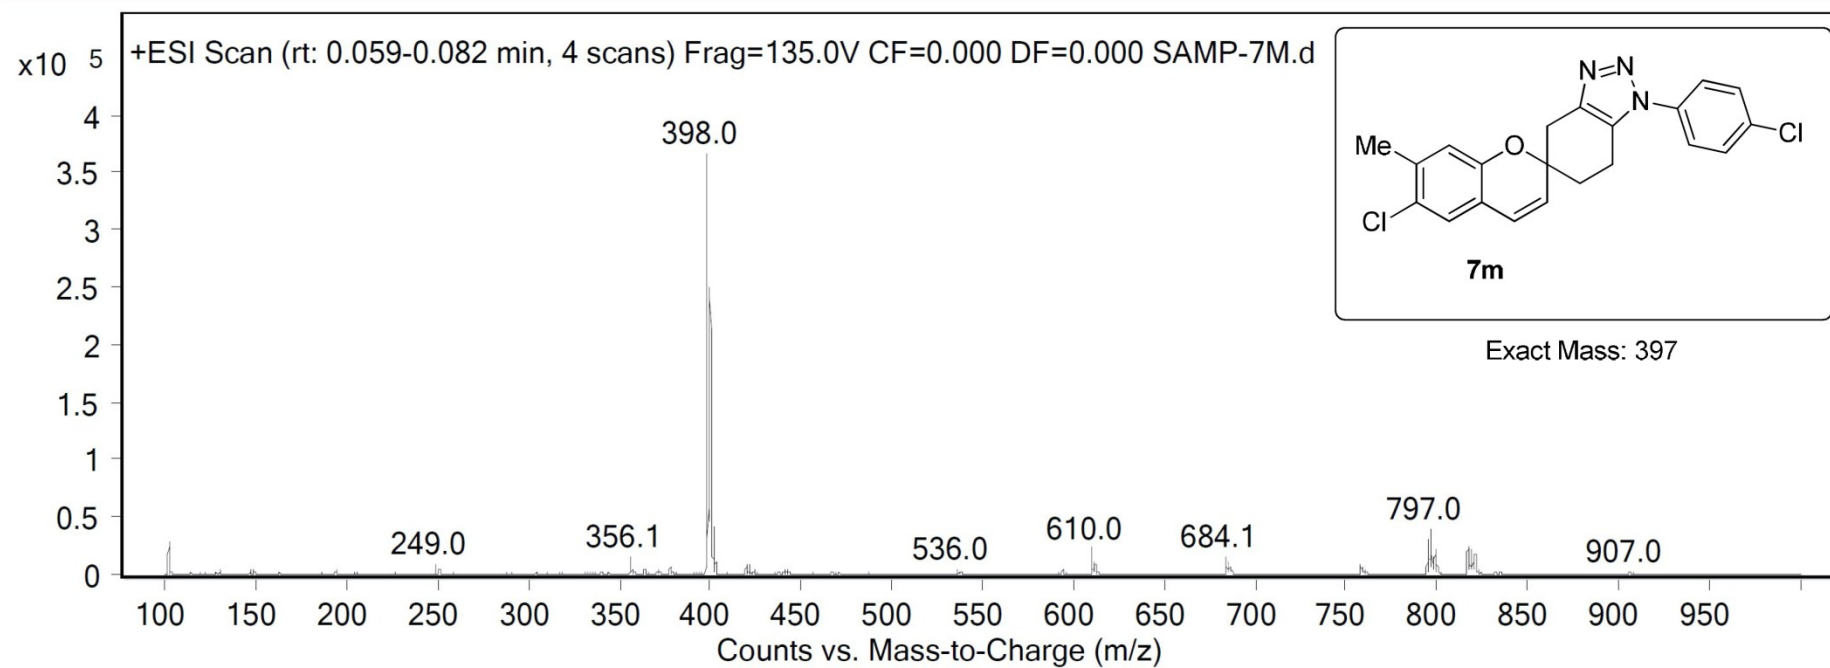

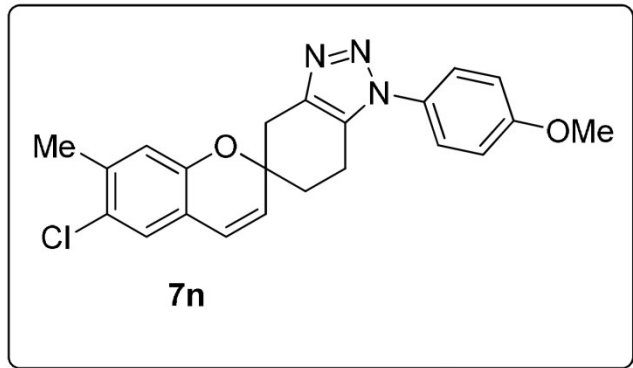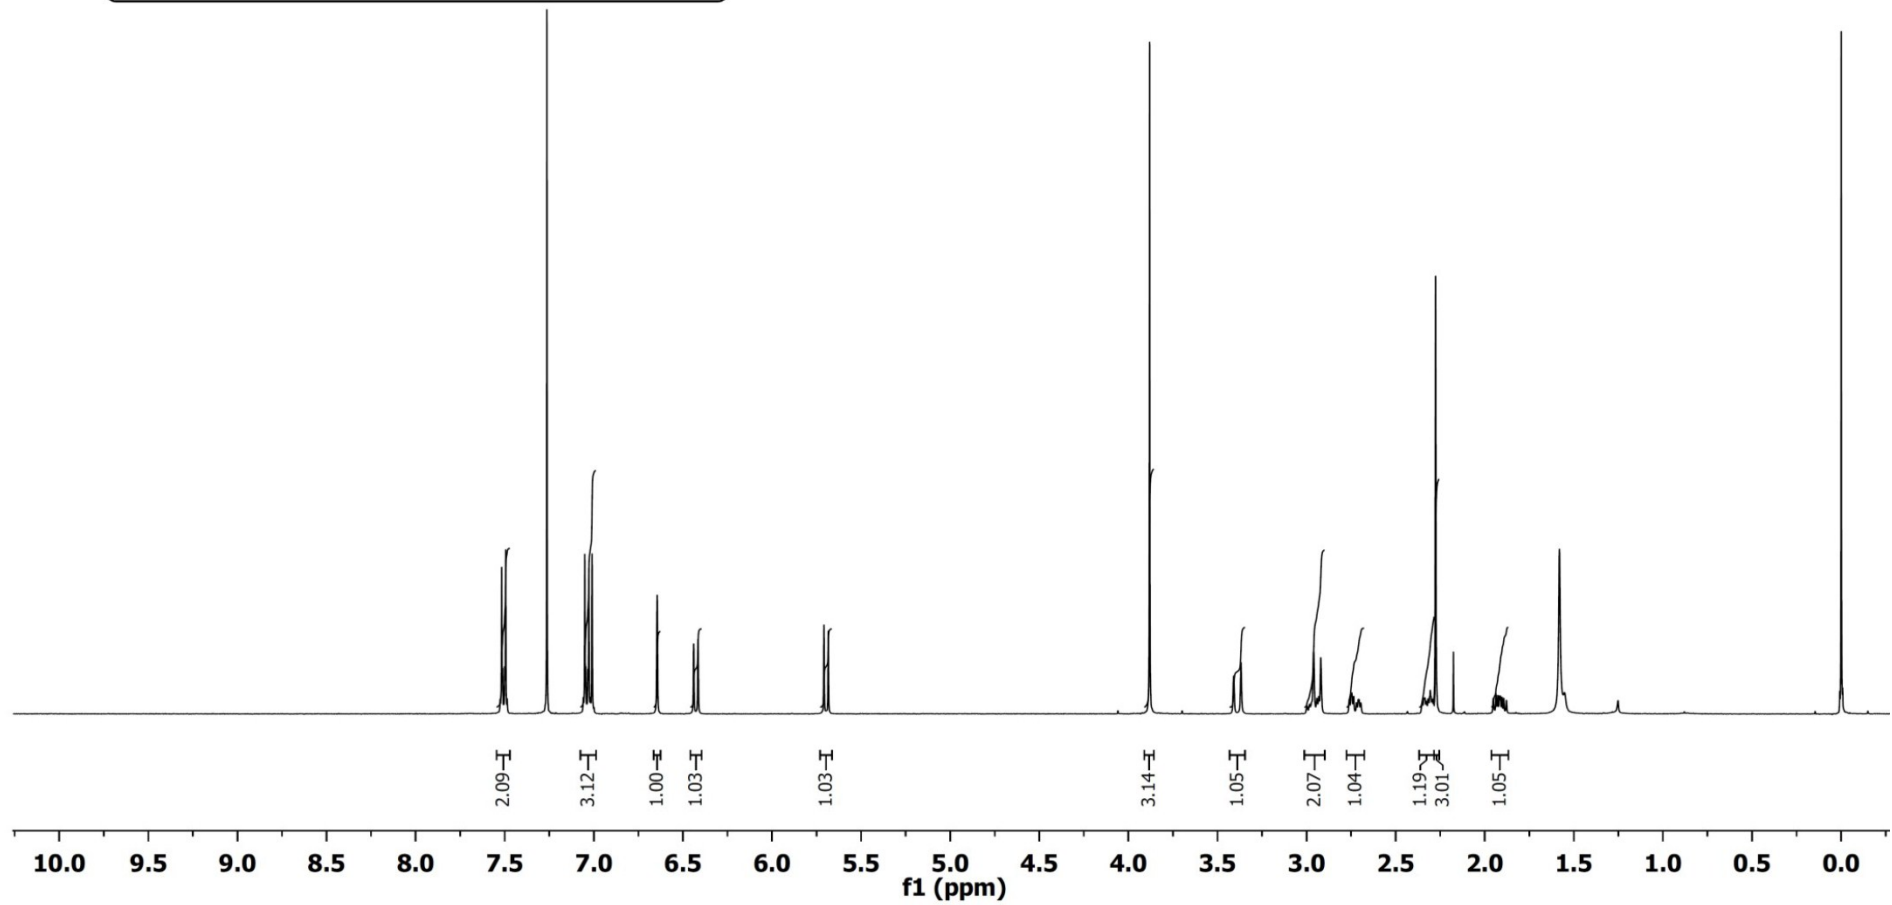

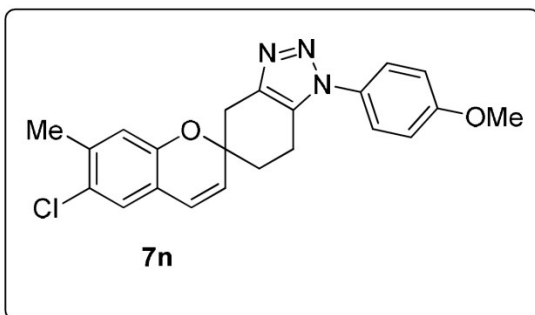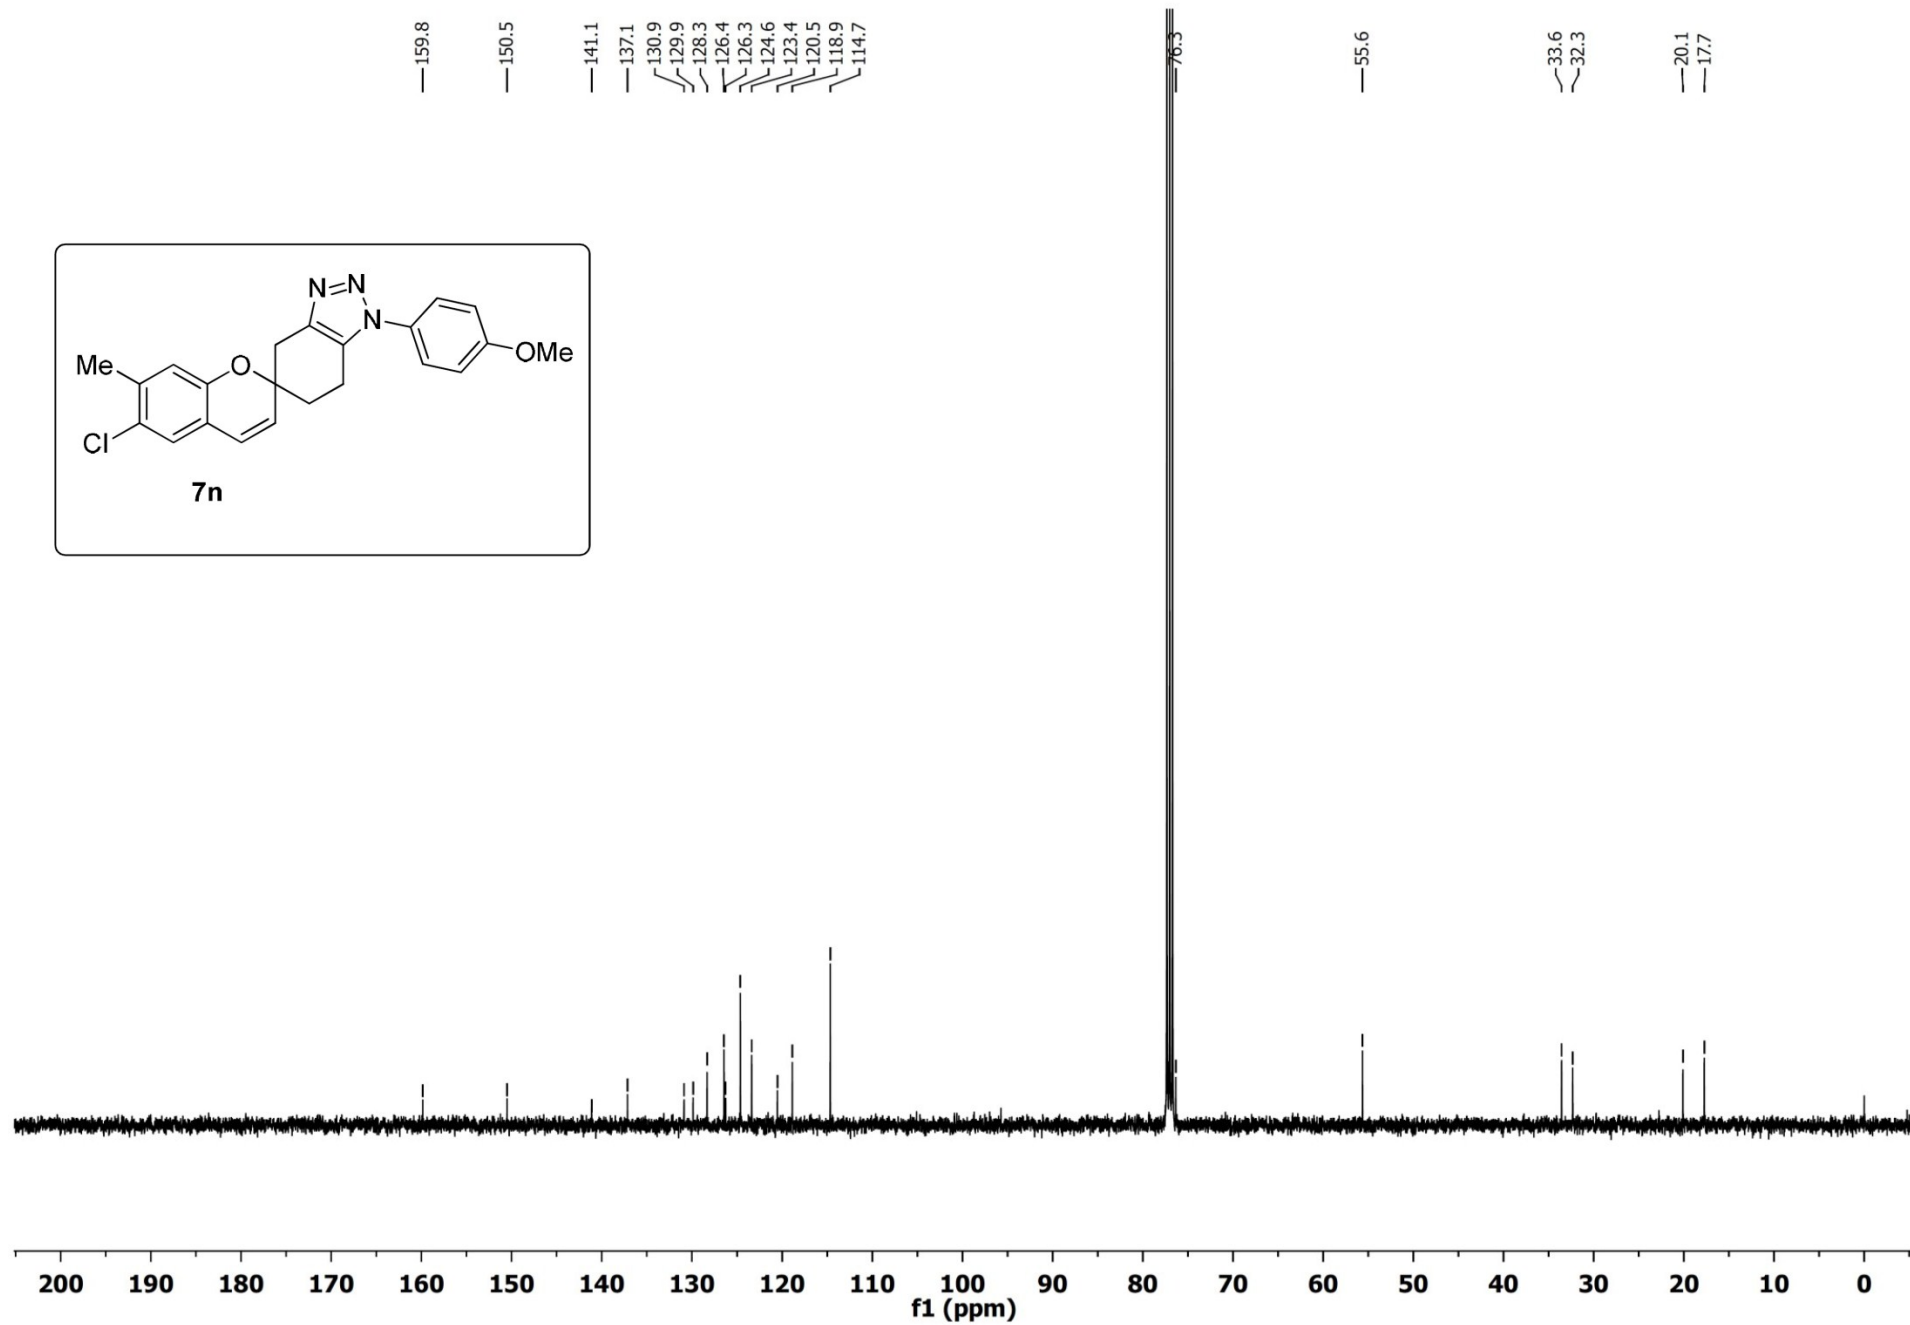

### Qualitative Plot Window Report

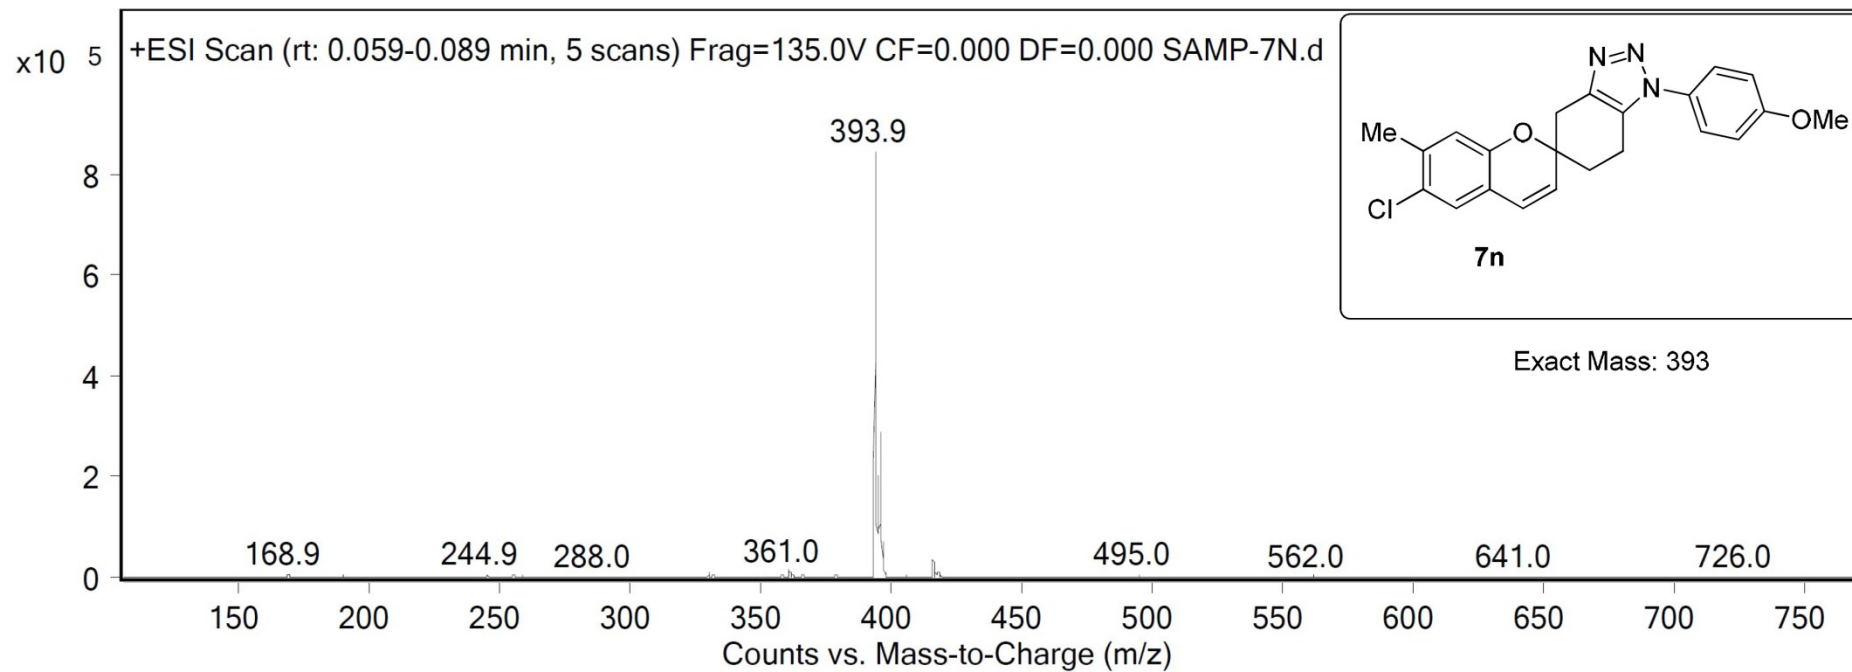

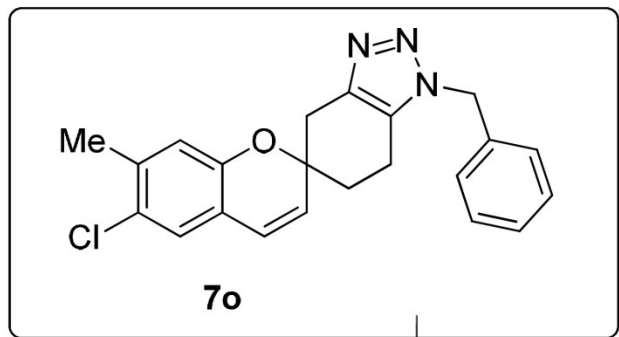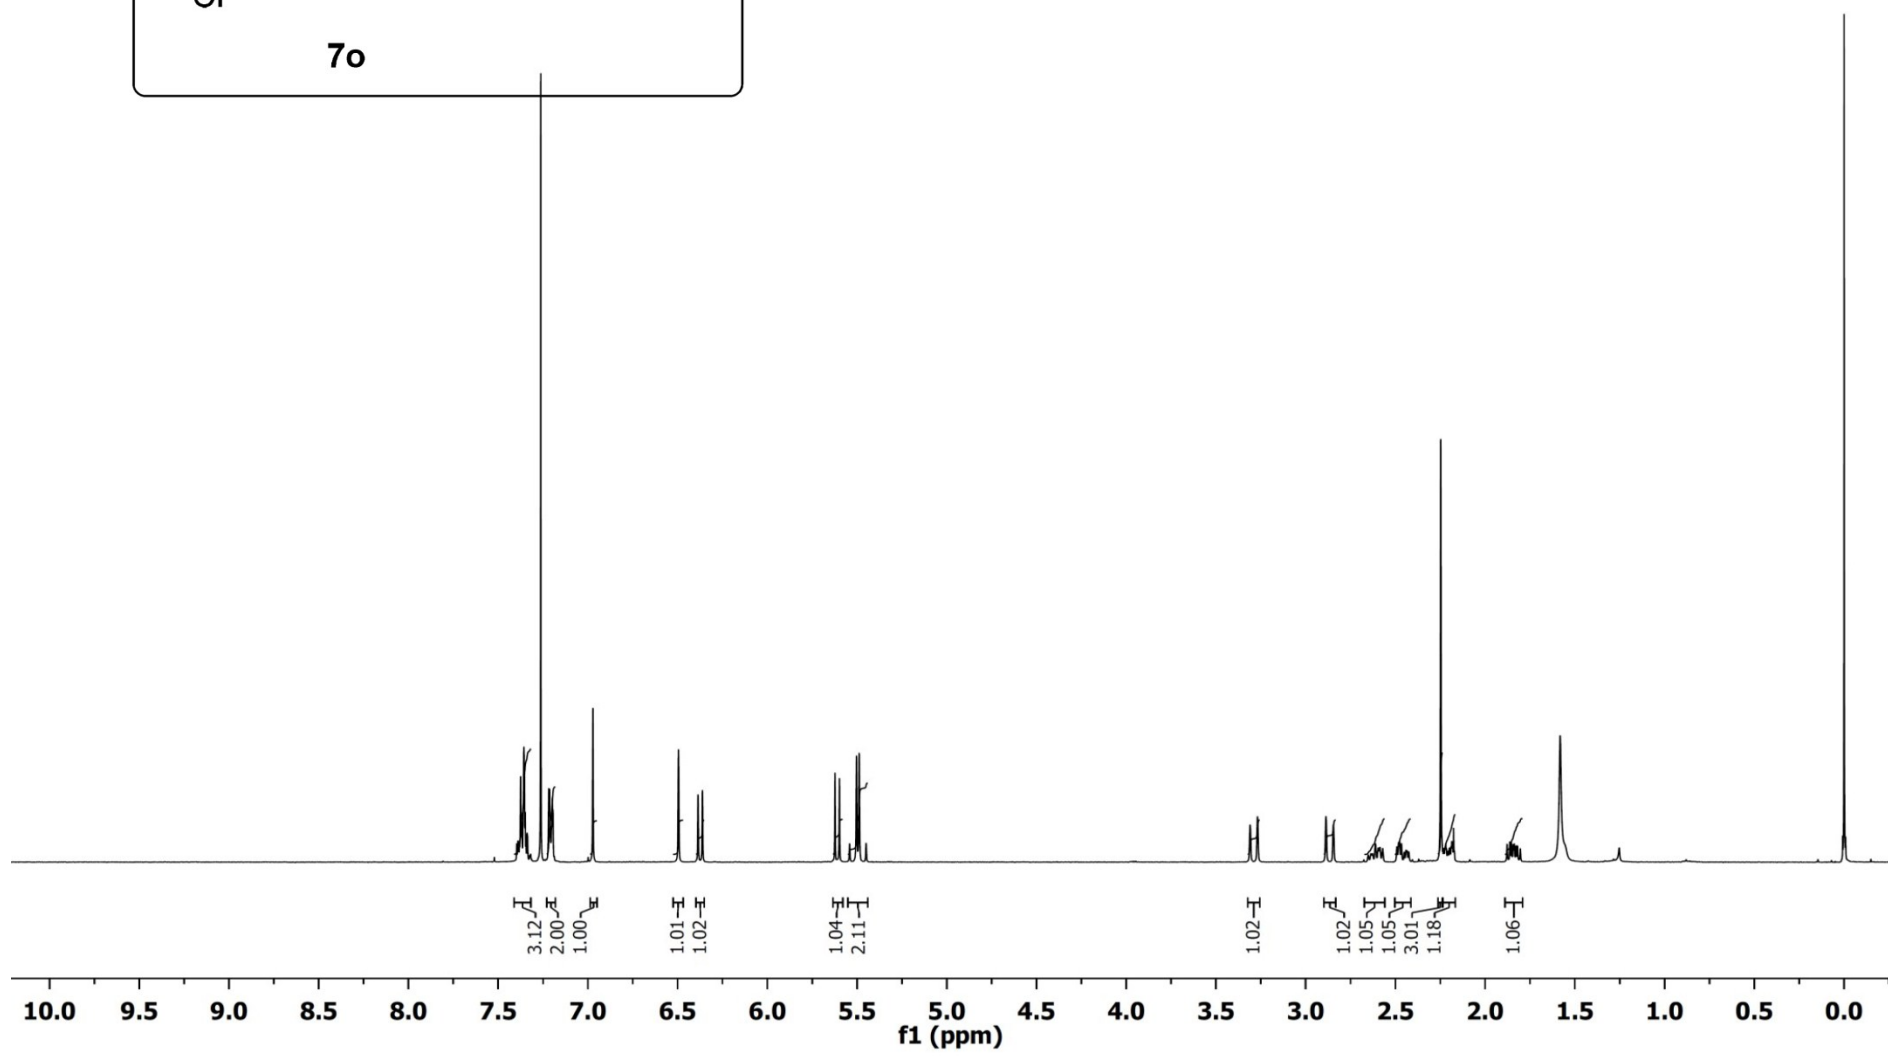

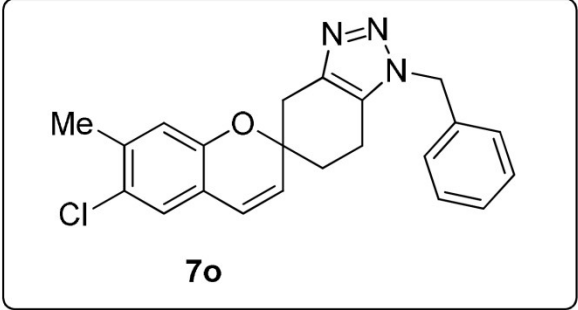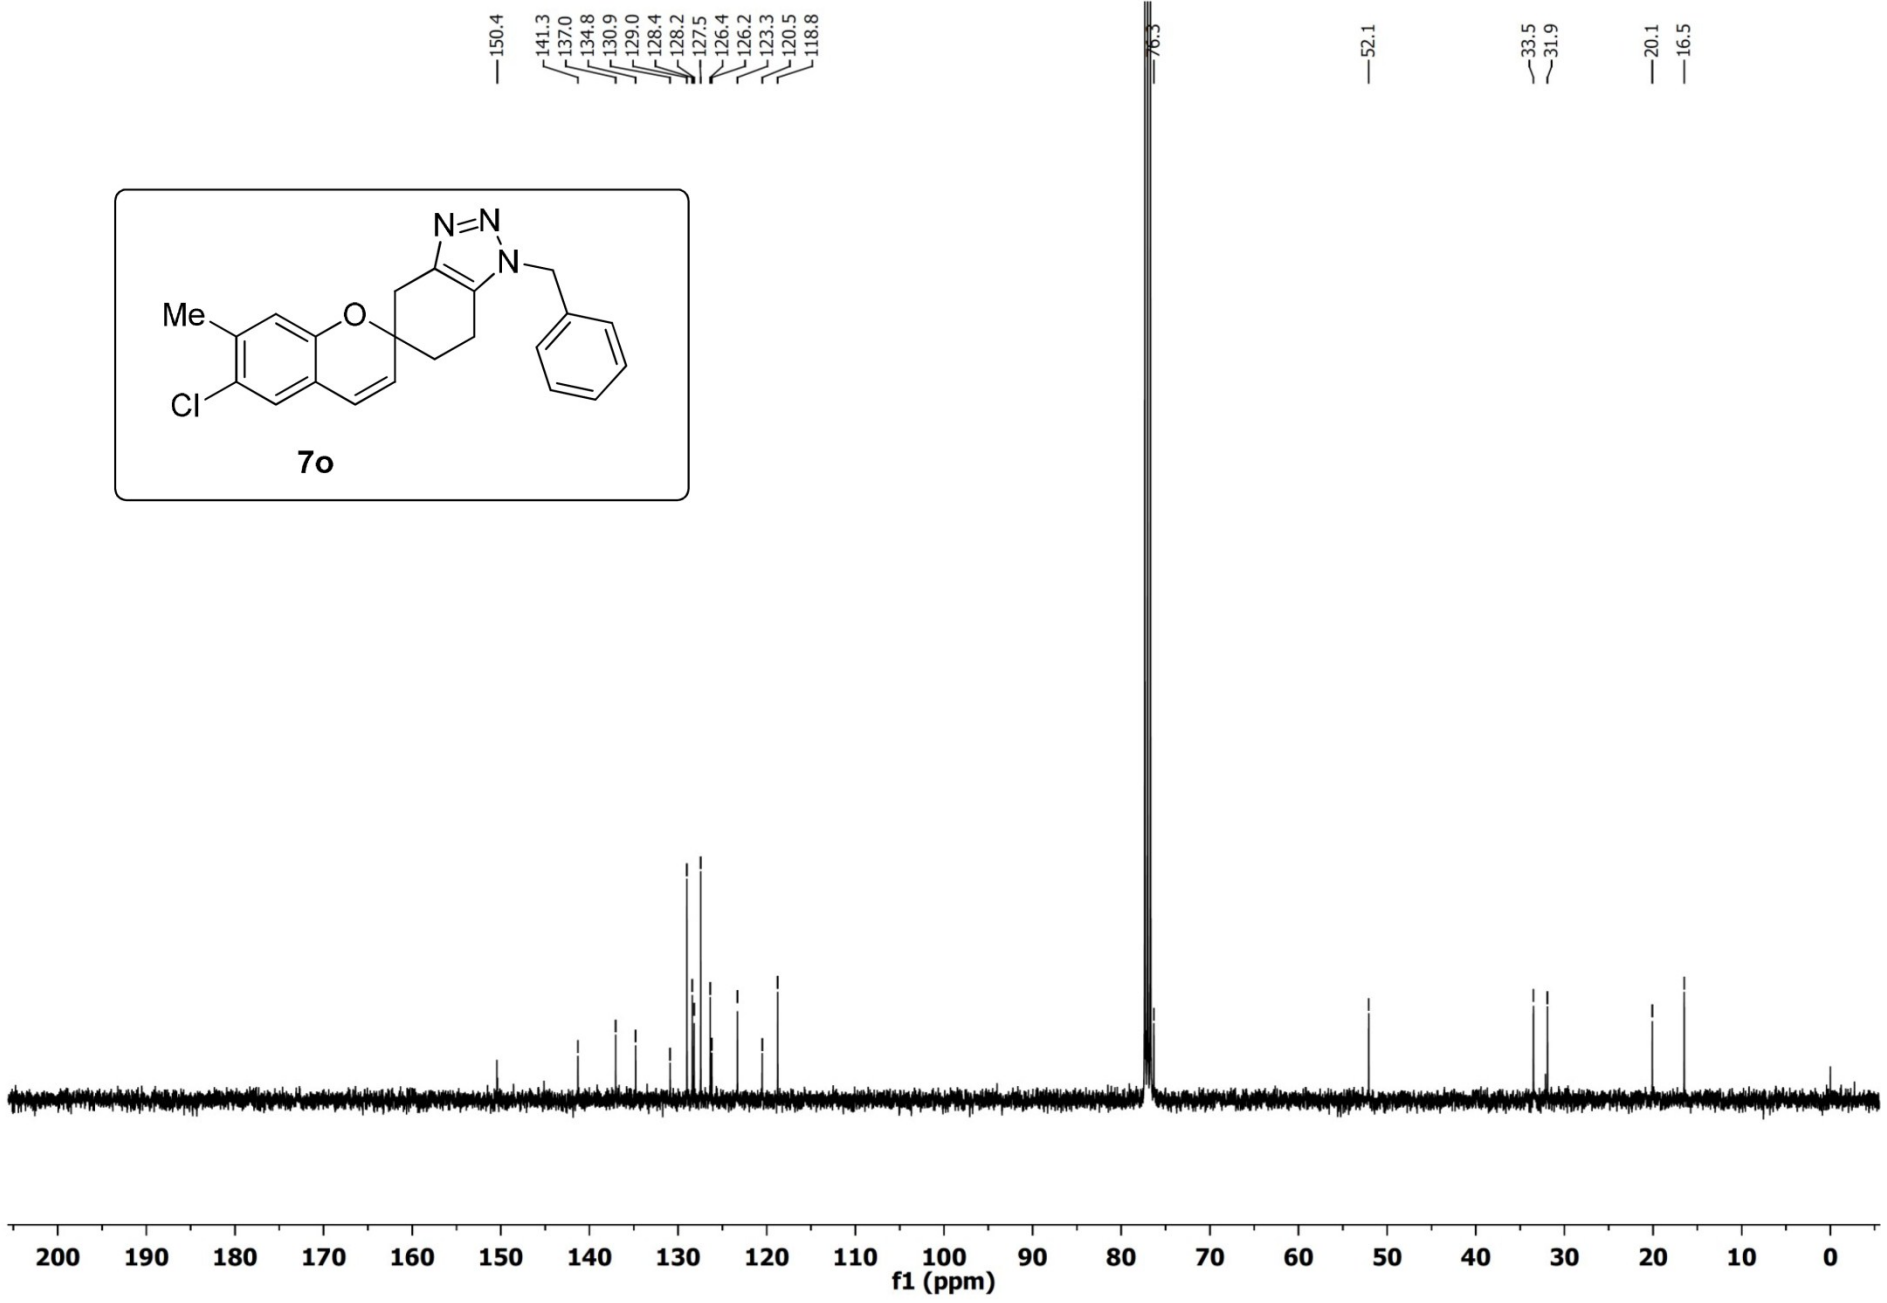

### Qualitative Plot Window Report

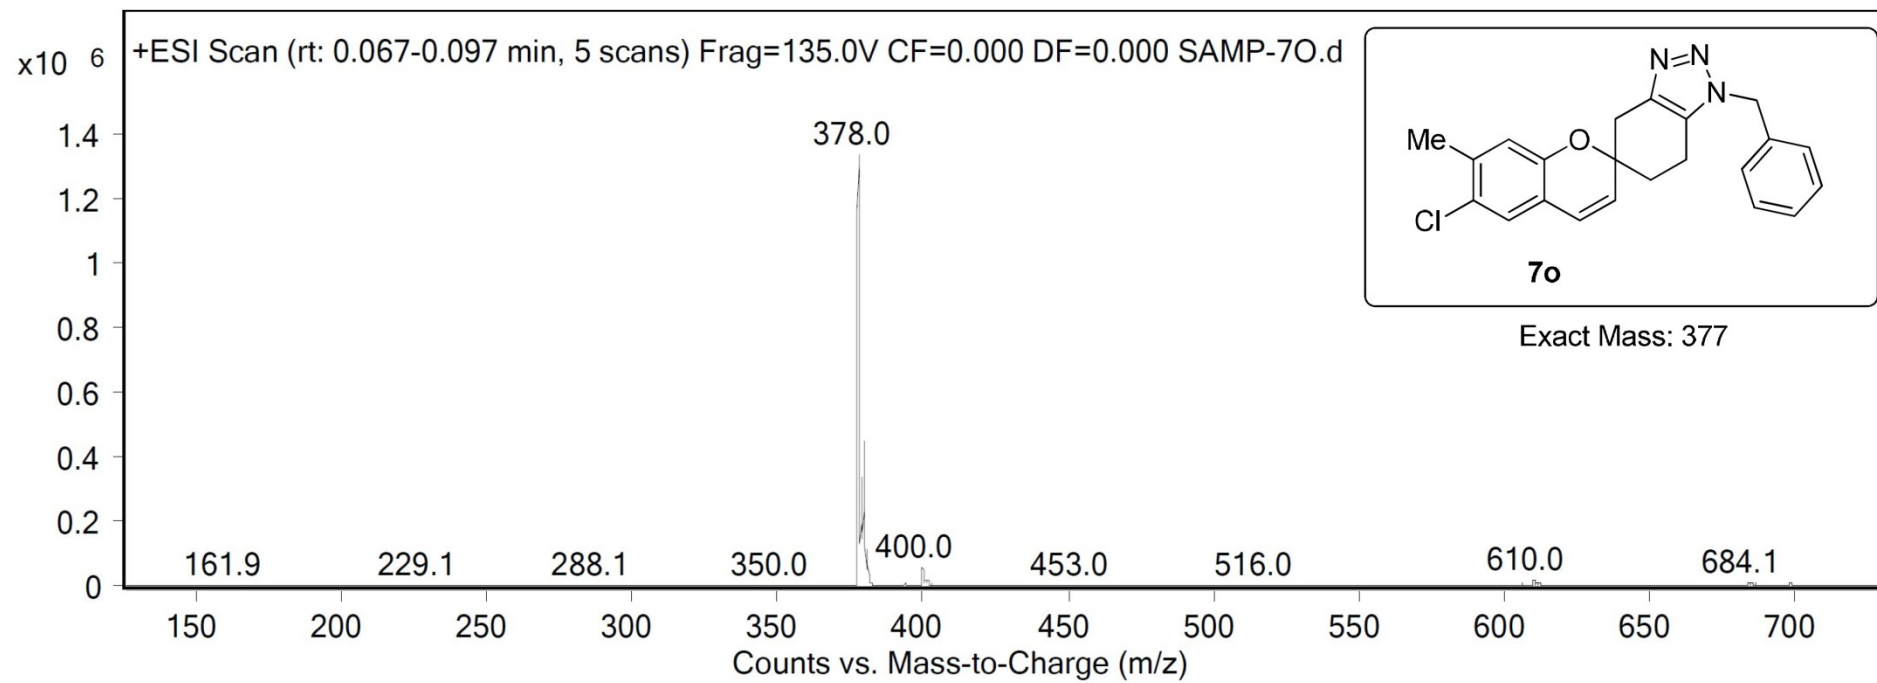

Supplement: c8ra03197e1.pdf [file c8ra03197e1.pdf]
